# Supplementary material for: TDP-43 prevents retrotransposon activation in the Drosophila motor system through regulation of Dicer-2 activity
Source: PubMed Central journal article supplement (PMC7334854; doi:10.1186/s12915-020-00816-1), 2020-07-03
Supplement: 12915_2020_816_MOESM1_ESM.pdf [file 12915_2020_816_MOESM1_ESM.pdf]

Customer name: Fabien Feiglin  
 Project name: W1118 vs. Delta 23  
 Chip: Affymetrix Drosophila Genome 2.0 Array  
 Organism: Drosophila  
 Analysis level: Gene

Data Overview: Regulated probesets

|                               | Up-regulated                  |                 | Down-regulated | All     |
|-------------------------------|-------------------------------|-----------------|----------------|---------|
|                               | Number of regulated probesets | Min fold-change | 1.50           | 1.50    |
| Average fold-change           | 3.30                          | 4.12            | 3.74           | 3.74    |
| Median of fold-change         | 1.92                          | 1.92            | 1.93           | 1.93    |
| Max fold-change               | 191.34                        | 462.37          | 462.37         | 462.37  |
| Gene with the max fold-change | CG10178                       | CG16173         | CG16173        | CG16173 |

List of the 1253 Regulated Probesets (Fold-change ≥ 1.5; P-Value ≤ 0,05)

| Affymetrix Probeset ID | Gene Symbol    | Gene Name                            | Regulation | Fold-Change | P-Value   | Representative Public ID | FlyBase ID   | Entrez Gene ID (NCBI) | Intensity Delta 23 | Intensity W1118 |
|------------------------|----------------|--------------------------------------|------------|-------------|-----------|--------------------------|--------------|-----------------------|--------------------|-----------------|
| 1628950_at             | CG10178        | ---                                  | up         | 191.34      | 1.97E-02  | CG10178-RA               | FBar0032884  | 35105                 | 7.75               | 1483.30         |
| 1628952_at             | Cyp28a1        | Cyp28a1                              | up         | 164.76      | 3.00E-04  | CG10241-RA               | FBar0013774  | 45556                 | 8.04               | 1283.83         |
| 1639594_at             | CG40485        | ---                                  | up         | 54.56       | 1.66E-02  | CG40485-RB               | FBar0059973  | 3355106               | 84.30              | 4599.29         |
| 1634209_at             | pim            | pimples                              | up         | 41.89       | 1.77E-04  | CG5052-RA                | FBar0003087  | 34404                 | 21.02              | 84.57           |
| 1632636_at             | Fbp1           | Protein-1                            | up         | 30.46       | 1.85E-02  | CG17285-RA               | FBar0000638  | 35966                 | 111.86             | 365.11          |
| 1629315_at             | TEK1N-C        | TEK1N-C                              | up         | 25.42       | 6.90E-04  | CG10541-RA               | FBar0003638  | 38653                 | 46.43              | 1180.34         |
| 1626774_s_at           | robo           | Roundabout 1                         | up         | 21.11       | 4.90E-03  | CG13521-RA               | FBar0006631  | 37603                 | 39.27              | 828.95          |
| 1627096_s_at           | CG16778        | BIT-protein-III                      | up         | 19.64       | 1.14E-03  | CG16778-RA               | FBar0000375  | 38007                 | 22.15              | 434.95          |
| 1630161_at             | CG9489         | ---                                  | up         | 19.14       | 6.98E-04  | CG9489-RA                | FBar0003129  | 43974                 | 18.07              | 327.77          |
| 1630728_s_at           | pfr            | pholylase                            | up         | 15.81       | 1.02E-03  | CG1205-RA                | FBar0003082  | 35735                 | 43.75              | 691.90          |
| 1636797_at             | CG14107        | ---                                  | up         | 12.25       | 3.31E-04  | CG14107-RA               | FBar0003631  | 39498                 | 7.78               | 96.23           |
| 1633461_at             | CG14394        | ---                                  | up         | 12.24       | 2.98E-02  | CG14394-RA               | FBar0003979  | 41568                 | 107.74             | 1267.46         |
| 1623655_at             | Yp2            | yolk protein 2                       | up         | 11.07       | 9.84E-04  | CG2079-RA                | FBar0005391  | 31938                 | 1160.91            | 1278.86         |
| 1640853_at             | CG18020        | ---                                  | up         | 10.99       | 1.92E-02  | CG18020-RA               | FBar0003543  | 38544                 | 6.11               | 67.16           |
| 1640446_s_at           | ---            | ---                                  | up         | 10.86       | 3.81E-04  | Transposon 39            | ---          | ---                   | 42.87              | 455.44          |
| 1637560_at             | CG42329        | CG14343                              | up         | 10.32       | 6.20E-03  | CG5156-RA                | FBar0292229  | 33312                 | 24.07              | 248.33          |
| 1623256_at             | GstE1          | glutathione-S-transferase            | up         | 8.50        | 6.88E-07  | CG5184-RA                | FBar0003435  | 32108                 | 748.82             | 6365.75         |
| 1629915_at             | CG43275        | ---                                  | up         | 7.81        | 3.88E-03  | CG43275-RA               | FBar0003129  | 33279                 | 6.75               | 52.70           |
| 1632045_at             | CG5697         | ---                                  | up         | 7.63        | 3.85E-02  | CG5697-RA                | FBar0003848  | 42483                 | 93.79              | 715.67          |
| 1627324_at             | lola           | longitudinals lacking                | up         | 7.61        | 7.98E-06  | CG12052-RH               | FBar0000580  | 44548                 | 47.81              | 363.89          |
| 1640335_at             | Frag2          | fat body protein P8                  | up         | 7.32        | 2.45E-03  | CG3762-RA                | FBar0003082  | 35735                 | 19.70              | 144.13          |
| 1624894_s_at           | dock           | dreadlocks                           | up         | 7.19        | 1.65E-03  | CG3727-RA                | FBar0001053  | 33262                 | 162.64             | 1169.39         |
| 1638772_at             | CG18107        | ---                                  | up         | 7.06        | 4.96E-04  | CG18107-RA               | FBar0003430  | 37101                 | 2122.99            | 14978.95        |
| 1638969_at             | Cpr5A          | ---                                  | up         | 6.92        | 2.11E-03  | CG10112-RA               | FBar0003492  | 36613                 | 99.65              | 690.04          |
| 1629479_s_at           | lok            | lfdgling of Klp38B                   | up         | 6.63        | 2.65E-03  | CG10746-RB               | FBar0002030  | 44880                 | 1080.82            | 7164.52         |
| 1632527_at             | CG13705        | ---                                  | up         | 6.25        | 3.20E-03  | CG13705-RA               | FBar0003582  | 38587                 | 134.63             | 841.74          |
| 1623410_at             | Pxd            | Peroxidase                           | up         | 6.23        | 5.45E-03  | CG11695                  | FBar0000497  | 2789871               | 502.91             | 3133.03         |
| 1633780_at             | CG13793        | ---                                  | up         | 6.11        | 4.08E-03  | CG13793-RA               | FBar0003582  | 34047                 | 17.19              | 105.05          |
| 1635312_at             | ---            | ---                                  | up         | 6.02        | 6.67E-03  | SD06617                  | ---          | ---                   | 17.12              | 103.01          |
| 1633045_at             | CheA7a         | CheA7a                               | up         | 5.96        | 2.08E-06  | CG15033-RA               | FBar0003948  | 41672                 | 1591.31            | 1151.88         |
| 1640666_at             | CG31205        | ---                                  | up         | 5.94        | 8.98E-04  | CG31205-RA               | FBar0001208  | 31826                 | 2654.74            | 2694.07         |
| 1627841_at             | CG11170        | ---                                  | up         | 5.88        | 3.98E-05  | CG11170-RB               | FBar0003476  | 37533                 | 57.06              | 335.36          |
| 1634091_at             | Cpr19          | Shear-19                             | up         | 5.84        | 2.01E-04  | CG6524-RA                | FBar0000338  | 41692                 | 53.13              | 310.28          |
| 1625433_at             | Scp1           | calcium binding protein              | up         | 5.71        | 1.83E-02  | CG1948-RA                | FBar0001529  | 3355102               | 842.63             | 4663.57         |
| 1633120_at             | ---            | ---                                  | up         | 5.55        | 9.33E-03  | HDC06051                 | ---          | ---                   | 11.18              | 62.09           |
| 1630905_at             | CG33093        | ---                                  | up         | 5.53        | 4.68E-01  | CG33093-RA               | FBar0003093  | 42664                 | 386.82             | 206.82          |
| 1641746_at             | Cpr11B         | ---                                  | up         | 5.48        | 2.09E-05  | CG2555-RA                | FBar0003398  | 32203                 | 276.74             | 1376.52         |
| 1638374_at             | Opr19b         | Odorant-binding protein 19b          | up         | 4.88        | 3.31E-07  | CG1670-RA                | FBar0001110  | 33038                 | 181.92             | 887.33          |
| 1628671_at             | drot           | drosomycin-F                         | up         | 4.76        | 1.25E-02  | CG3262-RA                | FBar0002282  | 317854                | 2398.02            | 11266.86        |
| 1640680_at             | CG4850         | ---                                  | up         | 4.68        | 1.93E-02  | CG4850-RA                | FBar0003763  | 40470                 | 116.73             | 740.25          |
| 1626086_at             | CG10621        | selenocysteine methyltransferase     | up         | 4.56        | 6.91E-03  | CG10621-RA               | FBar0002726  | 35152                 | 368.19             | 1680.04         |
| 1630927_s_at           | Pxd            | Peroxidase                           | up         | 4.56        | 2.75E-02  | CG11695                  | FBar0000497  | 2789871               | 391.37             | 1763.61         |
| 1640686_at             | CG9890         | ---                                  | up         | 4.52        | 3.81E-03  | CG9890-RA                | FBar0003926  | 42955                 | 99.24              | 624.86          |
| 1640870_s_at           | CG17322        | ---                                  | up         | 4.32        | 1.56E-04  | CG17322-RD               | FBar0002070  | 35139                 | 98.68              | 426.62          |
| 1639982_at             | CG15369        | ---                                  | up         | 4.26        | 2.79E-02  | CG15369-RA               | FBar0003105  | 31892                 | 26.16              | 111.46          |
| 1635215_at             | CG11437        | ---                                  | up         | 4.21        | 1.70E-03  | CG11437-RA               | FBar0001163  | 40470                 | 127.06             | 147.06          |
| 1626545_at             | Yp1            | yolk protein 1                       | up         | 4.16        | 3.85E-03  | CG2985-RA                | FBar0000404  | 31939                 | 5914.61            | 2426.34         |
| 1624704_at             | CG4741         | ---                                  | up         | 4.10        | 8.78E-03  | CG4741-RA                | FBar0003040  | 37939                 | 55.85              | 228.20          |
| 1641317_at             | squ            | Squash                               | up         | 4.03        | 7.13E-04  | HDC20844                 | ---          | ---                   | 279200             | 817.39          |
| 1628830_at             | CG6044 // Lcp1 | --- // cuticle p.1                   | up         | 4.00        | 1.45E-02  | CG1650-RA                | FBar0002531  | 35871 // 37558        | 42.92              | 171.71          |
| 1637123_at             | CG33281        | ---                                  | up         | 3.98        | 1.42E-02  | CG1507-RA                | FBar0003281  | 2789938               | 39.47              | 157.23          |
| 1632656_s_at           | Vmet           | Vesicular monoamine transporter      | up         | 3.97        | 3.96E-02  | CG3139-RA                | FBar0003192  | 33916                 | 23.89              | 69.89           |
| 1638475_at             | CG16885        | ---                                  | up         | 3.95        | 1.17E-02  | CG16885-RA               | FBar0003238  | 34811                 | 701.33             | 2769.32         |
| 1632705_at             | ninaD          | neither inactivation nor afterpotent | up         | 3.93        | 6.23E-03  | CG1783-RA                | FBar0002939  | 326160                | 120.21             | 471.84          |
| 1627281_at             | CG31117        | ---                                  | up         | 3.92        | 2.86E-02  | CG31117-RA               | FBar0003144  | 33444                 | 40.72              | 98.07           |
| 1630085_s_at           | Pentrophin-A   | pentrophin A                         | up         | 3.90        | 1.07E-03  | CG17058-RA               | FBar0002270  | 33023                 | 415.30             | 1621.16         |
| 1640857_at             | CG10208        | ---                                  | up         | 3.89        | 1.63E-06  | CG10208-RA               | FBar0003118  | 42814                 | 326.53             | 1270.42         |
| 1631432_at             | CG32749        | ---                                  | up         | 3.83        | 2.92E-02  | CG32749-RA               | FBar0003948  | 41672                 | 751.24             | 289.86          |
| 1624195_at             | sug            | sugarbabe                            | up         | 3.78        | 1.62E-02  | CG3850-RA                | FBar0003782  | 36424                 | 213.43             | 805.70          |
| 1623710_at             | CG5847         | ---                                  | up         | 3.70        | 5.77E-03  | CG5847-RA                | FBar0003698  | 40255                 | 26.29              | 245.48          |
| 1635131_at             | CG4425         | ---                                  | up         | 3.70        | 3.75E-03  | CG4425-RA                | FBar0003698  | 41692                 | 67.29              | 100.90          |
| 1631776_s_at           | raf            | proximal to raf                      | up         | 3.69        | 9.78E-06  | CG5841-RB                | FBar0003159  | 44529                 | 98.73              | 361.39          |
| 1625314_at             | CG2022         | ---                                  | up         | 3.66        | 2.21E-03  | CG2022-RA                | FBar0003292  | 40515                 | 241.55             | 883.29          |
| 1632960_at             | Cpr44Ae        | ---                                  | up         | 3.64        | 6.85E-06  | CG15006-RA               | FBar0003610  | 38509                 | 326.78             | 1195.25         |
| 1641461_at             | Ugt88Dg        | Ugt88Dg                              | up         | 3.63        | 3.38E-03  | CG68633-RA               | FBar0003354  | 36656                 | 586.56             | 1236.13         |
| 1625552_at             | Osi19          | Osi19                                | up         | 3.55        | 2.09E-02  | CG15189-RA               | FBar0003749  | 40776                 | 33.20              | 110.03          |
| 1626392_s_at           | Mer2           | Complementation group C              | up         | 3.47        | 6.91E-03  | Transposon 2             | ---          | ---                   | 36022              | 2154.60         |
| 1640830_at             | Actr29B        | Actr29B                              | up         | 3.45        | CG1747-RA | FBar0000445              | ---          | ---                   | 1169.44            | 4032.61         |
| 1624732_at             | GstE5          | Glutathione S transferase E5         | up         | 3.43        | 1.38E-04  | CG17527-RA               | FBar0003495  | 33110                 | 114.92             | 393.93          |
| 1638301_at             | CG8159         | ---                                  | up         | 3.41        | 5.71E-03  | CG8159-RA                | FBar00034010 | 36700                 | 246.45             | 840.47          |
| 1631725_s_at           | PRL-1          | PRL-1                                | up         | 3.40        | 3.25E-03  | CG49953-RB               | FBar0003358  | 34592                 | 1090.53            | 3366.26         |
| 1639098_s_at           | CG2837         | ---                                  | up         | 3.39        | 1.38E-04  | CG2837-RA                | FBar0003164  | 33696                 | 149.98             | 507.83          |
| 1623276_at             | CG31663        | ---                                  | up         | 3.38        | 5.23E-03  | CG31663-RA               | FBar0001663  | 33363                 | 142.17             | 480.80          |
| 1638911_at             | CG10335E       | Organic anion transporting polype    | up         | 3.37        | 1.12E-02  | CG5407-RA                | FBar0003174  | 33447                 | 285.15             | 891.25          |
| 1623834_at             | CG18641        | ---                                  | up         | 3.33        | 8.17E-03  | CG18641-RA               | FBar0003126  | 33429                 | 35.85              | 119.54          |
| 1630711_at             | Cpr97Ea        | ---                                  | up         | 3.32        | 3.58E-02  | CG6131-RA                | FBar0003480  | 43258                 | 2232.35            | 7409.45         |
| 1638015_s_at           | CG32860        | ---                                  | up         | 3.30        | 3.84E-02  | Transposon 97            | ---          | ---                   | 2403.65            | 789.15          |
| 1630577_at             | CG17378        | ---                                  | up         | 3.28        | 4.57E-03  | CG17378-RA               | FBar0003186  | 33681                 | 24.03              | 78.90           |
| 1632870_at             | CG32364        | ---                                  | up         | 3.28        | 2.44E-02  | CG32364-RA               | FBar0003364  | 33796                 | 72.91              | 236.20          |
| 1632626_s_at           | ---            | ---                                  | up         | 3.27        | 6.94E-03  | Transposon 48            | ---          | ---                   | 358.73             | 308.20          |
| 1638853_at             | Cpr47E         | ---                                  | up         | 3.21        | 1.80E-02  | CG13214-RA               | FBar0003603  | 36104                 | 255.90             | 820.84          |
| 1637536_at             | CG14303        | ---                                  | up         | 3.19        | 3.63E-02  | CG14303-RA               | FBar0003633  | 42236                 | 26.87              | 86.84           |
| 1632715_at             | CG42254        | OR30478                              | up         | 3.18        | 1.88E-02  | CG12854-RA               | FBar0003112  | 36644                 | 48.38              | 147.92          |
| 1628043_s_at           | ---            | ---                                  | up         | 3.17        | 1.57E-02  | HDC1916B                 | ---          | ---                   | 19.98              | 63.65           |
| 1637141_at             | CG3p33         | Odorant-binding protein 83q          | up         | 3.14        | 1.25E-02  | CG31588-RA               | FBar0004876  | 17078                 | 579.07             | 1817.22         |
| 1627588_at             | CG13483        | ---                                  | up         | 3.13        | 2.95E-05  | CG13483-RA               | FBar0003698  | 41692                 | 181.10             | 609.86          |
| 1631430_at             | CG14304        | ---                                  | up         | 3.13        | 3.41E-02  | CG14304-RA               | FBar0003829  | 42322                 | 429.02             | 429.02          |
| 1629629_at             | CGR4R          | hormone receptor                     | up         | 3.12        | 4.09E-02  | CG11325-RB               | FBar0002596  | 33942</               |                    |                 |

|              |                                   |                                             |    |      |          |               |                                    |                   |          |          |
|--------------|-----------------------------------|---------------------------------------------|----|------|----------|---------------|------------------------------------|-------------------|----------|----------|
| 163632_s_at  | CG2982                            | ---                                         | up | 2.32 | 4.30E-02 | CG2982-RB     | FbAn020704                         | 31374             | 523.98   | 1216.20  |
| 163697_s_at  | hsp42a                            | hsp42a                                      | up | 2.32 | 3.19E-02 | CG11005-RA    | FbAn01005-RA                       | 21614             | 211.81   | 693.25   |
| 163730_s_at  | Cpr76B                            | CG8299                                      | up | 2.31 | 1.50E-02 | CG8299-RA     | FbAn033881                         | 40123             | 811.55   | 824.19   |
| 1629530_s_at | IM23                              | Immune induced molecule 23                  | up | 2.31 | 1.89E-02 | CG15066-RA    | FbAn034328                         | 37099             | 831.85   | 16240.46 |
| 1632986_s_at | CG15088                           | ---                                         | up | 2.31 | 1.11E-03 | CG15088-RB    | FbAn034361                         | 31757             | 239.03   | 542.03   |
| 1637145_s_at | CG14787                           | ---                                         | up | 2.30 | 2.18E-02 | CG14787-RA    | FbAn011036                         | 87146             | 871.46   | 2017.78  |
| 1626967_s_at | CajpB                             | CajpB                                       | up | 2.30 | 5.53E-05 | CG8107-RA     | FbAn025886                         | 39125             | 1720.39  | 3948.86  |
| 1640125_s_at | CG8349                            | ---                                         | up | 2.29 | 1.80E-03 | CG8349-RB     | FbAn034046                         | 36742             | 155.44   | 356.31   |
| 1626184_s_at | ltpaA                             | ---                                         | up | 2.29 | 1.98E-03 | CG10742-RA    | FbAn01742-RA                       | 31214             | 155.44   | 212.34   |
| 1639714_s_at | ---                               | Yersinpanin 3A                              | up | 2.29 | 1.37E-02 | CR_16_GH14469 | FbAn025936                         | ---               | 136.37   | 311.94   |
| 1634742_s_at | Sodh2                             | Sorbitol dehydrogenase-2                    | up | 2.28 | 5.31E-04 | CG4988-RA     | FbAn020259                         | 41313             | 346.87   | 720.47   |
| 1637935_s_at | Som3d4                            | Serine protease inhibitor 1                 | up | 2.28 | 2.63E-02 | CG12172-RA    | FbAn024284                         | 45241             | 291.22   | 665.25   |
| 1624745_s_at | lps                               | Drosophila insulin-like peptide 5           | up | 2.28 | 4.98E-03 | HDC09365      | FbAn040448                         | 276892            | 534.47   | 1208.34  |
| 1639028_s_at | CG11714 // Fucal                  | --- // alpha-L-fucosidase                   | up | 2.28 | 8.09E-03 | CG33047-RA    | 0036169 // FbAn0003772654          | 131.15            | 129.03   | 296.03   |
| 1626333_s_at | ---                               | ---                                         | up | 2.28 | 2.30E-02 | CG116299      | ---                                | 203.64            | 45.75    | ---      |
| 1640833_s_at | CG42237                           | phospholipase A2                            | up | 2.25 | 1.31E-02 | CG4346-RA     | FbAn025082                         | 32261             | 203.64   | 468.02   |
| 1640397_s_at | CG34360                           | CG12802                                     | up | 2.25 | 1.27E-02 | CG34699-RA    | FbAn025018                         | 41277             | 79.17    | 177.84   |
| 1639461_s_at | CG17218                           | ---                                         | up | 2.24 | 3.19E-03 | CG17218-RA    | FbAn033421                         | 34646             | 538.55   | 1211.72  |
| 1633097_s_at | CG14770 // DsmGCG14770            | ---                                         | up | 2.24 | 4.11E-02 | CG14770-RA    | FbAn029573                         | 31085             | 430.81   | 965.27   |
| 1623565_s_at | CG17005                           | ---                                         | up | 2.24 | 2.07E-02 | CG17005-RA    | FbAn032109                         | 34249             | 49.33    | 110.34   |
| 1640205_s_at | RhoGAP71E                         | RhoGAP71E                                   | up | 2.23 | 6.15E-02 | CG32149-RB    | FbAn030518                         | 39943             | 154.90   | 345.07   |
| 1641389_s_at | cracked                           | ---                                         | up | 2.22 | 5.48E-04 | CG14959-RA    | FbAn035427                         | 38402             | 186.71   | 414.00   |
| 1627793_s_at | CG9134                            | ---                                         | up | 2.21 | 1.45E-02 | CG9134-RB     | FbAn033599                         | 38141             | 145.78   | 322.16   |
| 1623705_s_at | CG9488                            | ---                                         | up | 2.21 | 8.27E-04 | CG9488-RA     | FbAn031801                         | 31935             | 571.70   | 1253.28  |
| 1637490_s_at | CG13314                           | ---                                         | up | 2.21 | 1.65E-02 | CG13314-RA    | FbAn033949                         | 38030             | 316.53   | 257.39   |
| 1633268_s_at | Nha1                              | serine protease                             | up | 2.21 | 1.37E-02 | CG10896-RB    | FbAn031865                         | 33951             | 53.38    | 117.83   |
| 1629415_s_at | nutc                              | nutc                                        | up | 2.21 | 9.31E-03 | CG87104A      | FbAn031158                         | 38979             | 843.57   | 1893.17  |
| 1639999_s_at | CG2962                            | shrunken nuts                               | up | 2.20 | 1.33E-02 | CG2662-RA     | FbAn024993                         | 31254             | 101.12   | 222.38   |
| 1632403_s_at | CG12263                           | ---                                         | up | 2.20 | 4.95E-03 | CG12263-RA    | FbAn033436                         | 37118             | 166.83   | 366.87   |
| 1623389_s_at | CG8209                            | ---                                         | up | 2.20 | 1.01E-02 | CG8209-RA     | FbAn030630                         | 36209             | 331.61   | 833.11   |
| 1632664_s_at | Osl2                              | Osl2                                        | up | 2.20 | 4.25E-03 | CG11584-RA    | FbAn033749                         | 40708             | 52.81    | 115.67   |
| 1628100_s_at | CG33981 // fab1                   | BEST/GH01256 // Ptdins3p 5-kinase-III-delta | up | 2.19 | 3.12E-02 | CG6335-RA     | 0028741 // FbAn02037033 // 3885664 | 40.22             | 18.84    | ---      |
| 1632683_s_at | cupinD9                           | cupinD9                                     | up | 2.18 | 7.89E-03 | CG39991-11    | FbAn030111                         | 38999             | 45.70    | 266.05   |
| 1637077_s_at | CG3777                            | gag-nl-pd                                   | up | 2.18 | 6.30E-03 | CG3777-RB     | FbAn024889                         | 30979             | 874.77   | 1908.34  |
| 1627502_s_at | CG9304                            | ---                                         | up | 2.17 | 1.18E-02 | CG9304-RA     | FbAn033474                         | 37500             | 288.86   | 627.74   |
| 1636449_s_at | Dip-B                             | Dipeptidase B                               | up | 2.17 | 6.84E-03 | CG6285-RA     | FbAn030054                         | 44852             | 183.35   | 3992.11  |
| 1637723_s_at | modfiens7_2                       | modfiens7_2                                 | up | 2.17 | 3.81E-02 | CG32461-5B    | FbAn030241                         | 39241             | 106.79   | 1068.19  |
| 1641567_s_at | CG32850                           | la costa // lehal1/1Eed                     | up | 2.16 | 3.69E-02 | CG12794-RA    | FbAn028853                         | 32007 // 33120    | 224.00   | 484.34   |
| 1640485_s_at | CG18522 // DsmCG18522             | ---                                         | up | 2.16 | 7.20E-04 | CG32850-RA    | FbAn029280                         | 318248            | 2896.29  | 6240.05  |
| 1635531_s_at | roil                              | rolling stone                               | up | 2.16 | 1.07E-03 | CG18522-RA    | FbAn029347                         | 41994             | 1903.74  | 4481.11  |
| 1636208_s_at | CG15097                           | ---                                         | up | 2.16 | 1.44E-03 | CG9552-RA     | FbAn011706                         | 34222             | 689.84   | 1480.12  |
| 1630717_s_at | CG4017                            | ---                                         | up | 2.15 | 2.25E-03 | CG15097-RB    | FbAn034398                         | 37172             | 287.26   | 610.77   |
| 1630224_s_at | CG6410                            | ---                                         | up | 2.15 | 2.91E-02 | CG6410-RA     | FbAn034266                         | 37015             | 194.77   | 418.16   |
| 1629184_s_at | CG16978                           | ---                                         | up | 2.15 | 3.19E-03 | CG16978-RA    | FbAn034072                         | 35048             | 347.07   | 774.81   |
| 1637605_s_at | CG3747                            | ---                                         | up | 2.14 | 2.19E-02 | CG3747-RA     | FbAn030742                         | 32969             | 255.33   | 1291.27  |
| 1634343_s_at | Rpt6R                             | ---                                         | up | 2.14 | 2.97E-02 | CG2241-RA     | FbAn030788                         | 43635             | 247.30   | 528.95   |
| 1628895_s_at | CG32698                           | ---                                         | up | 2.14 | 1.30E-02 | CG32698-RB    | FbAn032988                         | 31915             | 81.88    | 174.82   |
| 1629715_s_at | ems                               | ---                                         | up | 2.13 | 1.83E-05 | CG7637-RA     | FbAn030581                         | 34618             | 148.18   | 345.63   |
| 1628111_s_at | mRPL18                            | mitochondrial ribosomal protein L18         | up | 2.13 | 2.28E-03 | CG12373-RA    | CG12373-RA                         | 36406             | 338.85   | 722.76   |
| 1641055_s_at | Hsp23                             | Protein 23                                  | up | 2.13 | 1.43E-02 | CG4463-RA     | FbAn010224                         | 38077             | 959.68   | 2045.35  |
| 1633741_s_at | ---                               | ---                                         | up | 2.12 | 1.23E-02 | CG11032-RA    | FbAn031032                         | 38103             | 46.70    | 99.70    |
| 1634671_s_at | CG41284 // CG42598                | ---                                         | up | 2.12 | 2.98E-02 | CG4389-RB     | FbAn038599                         | 574085 // 8674042 | 32.38    | 68.95    |
| 1629479_s_at | CG1637                            | ---                                         | up | 2.12 | 1.42E-02 | CG1637-RA     | FbAn030246                         | 32019             | 122.36   | 259.48   |
| 1629917_s_at | CG14089                           | ---                                         | up | 2.12 | 1.31E-02 | CG14089-RB    | FbAn034948                         | 38446             | 285.33   | 652.92   |
| 1640795_s_at | CG13280                           | ---                                         | up | 2.11 | 4.71E-02 | CG13280-RA    | FbAn032609                         | 35015             | 110.54   | 65.64    |
| 1630038_s_at | dyt3                              | dyt3                                        | up | 2.11 | 1.01E-02 | CG3027-RA     | FbAn037513                         | 40916             | 1076.54  | 2276.21  |
| 1632565_s_at | CG3223                            | ---                                         | up | 2.11 | 2.85E-02 | CG3223-RA     | FbAn030538                         | 39157             | 240.87   | 264.77   |
| 1639440_s_at | CG13285                           | ---                                         | up | 2.11 | 4.12E-02 | CG13285-RA    | FbAn033611                         | 39623             | 160.57   | 338.30   |
| 1635161_s_at | ---                               | ---                                         | up | 2.11 | 4.28E-02 | CG3782-RA     | FbAn028816                         | ---               | 4242.76  | 8934.70  |
| 1629598_s_at | TrpII                             | tripeptidyl peptidase II                    | up | 2.10 | 4.00E-02 | CG3991-RB     | FbAn030944                         | 36444             | 5106.36  | 6552.92  |
| 1629039_s_at | asrII                             | ---                                         | up | 2.09 | 1.28E-02 | CG13533-RA    | FbAn030763                         | 37637             | 159.67   | 333.96   |
| 1623666_s_at | CG10516                           | ---                                         | up | 2.09 | 1.09E-03 | CG10516-RA    | FbAn036549                         | 39738             | 558.23   | 1164.99  |
| 1628999_s_at | Lsp106a                           | Larval serum protein 1 beta                 | up | 2.09 | 4.85E-02 | CG4178-RA     | FbAn030263                         | 33274             | 464.17   | 969.79   |
| 1638995_s_at | CG10136                           | ---                                         | up | 2.09 | 2.71E-03 | CG10136-RA    | FbAn030241                         | 39241             | 11698.14 | 11698.14 |
| 1638567_s_at | CG1092                            | ---                                         | up | 2.09 | 1.41E-03 | CG1092-RA     | FbAn030728                         | 40528             | 220.06   | 455.51   |
| 1638621_s_at | CG31648                           | Complex IV assembly protein COI             | up | 2.07 | 1.17E-02 | CG31648-RB    | FbAn030148                         | 33778             | 184.02   | 380.47   |
| 1633861_s_at | CG8145                            | ---                                         | up | 2.06 | 4.27E-03 | CG8145-RA     | FbAn030138                         | 41038             | 109.26   | 245.87   |
| 1628749_s_at | CG18135                           | ---                                         | up | 2.06 | 4.97E-02 | CG18135-RB    | FbAn030837                         | 40073             | 3523.84  | 7275.04  |
| 1639621_s_at | CG10916                           | ---                                         | up | 2.06 | 6.22E-03 | CG10916-RA    | FbAn034312                         | 37081             | 341.27   | 704.56   |
| 1639707_s_at | Antiviral                         | Seryl-RNA synthetase                        | up | 2.06 | 1.49E-02 | CG49384-RA    | FbAn031176                         | 41962             | 169.27   | 345.96   |
| 1640365_s_at | CG14021                           | ---                                         | up | 2.06 | 1.17E-03 | CG14021-RB    | FbAn033703                         | 33765             | 426.46   | 878.88   |
| 1637051_s_at | RhoGAP71E                         | RhoGAP71E                                   | up | 2.06 | 3.59E-02 | CG32149-RA    | FbAn030518                         | 39693             | 110.00   | 226.60   |
| 1632441_s_at | Cyp305a1                          | Cyp305a1                                    | up | 2.06 | 1.48E-03 | CG32149-RB    | CG3210763                          | ---               | 36.14    | 72.27    |
| 1629613_s_at | CG11236                           | ---                                         | up | 2.06 | 1.72E-03 | CG8733-RA     | FbAn030181                         | 40161             | 430.97   | 886.07   |
| 1634850_s_at | lun kinase                        | ---                                         | up | 2.06 | 1.18E-02 | CG11236-RA    | FbAn031860                         | 33955             | 264.03   | 542.75   |
| 1624449_s_at | CG6356                            | ---                                         | up | 2.05 | 1.62E-02 | CG6356-RA     | FbAn030178                         | 42893             | 440.95   | 902.84   |
| 1634341_s_at | CG6129                            | ---                                         | up | 2.05 | 4.07E-03 | CG6129-RA     | FbAn030152                         | 42860             | 77.38    | 156.36   |
| 1633881_s_at | 13857 // DsmCG13857 // DsmCG13857 | ---                                         | up | 2.05 | 2.88E-02 | CG13857-RA    | FbAn030608                         | 39167             | 103.26   | 209.27   |
| 1634809_s_at | CG30194                           | ---                                         | up | 2.05 | 2.60E-02 | CG30194-RA    | FbAn030194                         | 38757             | 43.14    | 88.06    |
| 1636572_s_at | Duox                              | Dual oxidase                                | up | 2.04 | 8.04E-03 | CG3131-RA     | FbAn0301464                        | 33477             | 384.61   | 784.78   |
| 1628935_s_at | CG8654                            | ---                                         | up | 2.04 | 2.31E-02 | CG8654-RB     | FbAn030146                         | 33477             | 384.61   | 784.78   |
| 1628935_s_at | CG10962                           | ---                                         | up | 2.04 | 1.35E-02 | CG10962-RA    | FbAn030073                         | 31824             | 400.23   | 835.92   |
| 1635413_s_at | CG32266                           | ---                                         | up | 2.03 | 1.06E-03 | CG32266-RB    | FbAn030286                         | 317945            | 99.57    | 202.37   |
| 1628915_s_at | CG33784                           | ---                                         | up | 2.03 | 8.35E-02 | CG33784-RB    | CG33784-RB                         | 24349             | 134.89   | 274.11   |
| 1623309_s_at | CG6055                            | ---                                         | up | 2.02 | 8.72E-03 | HDC12790      | FbAn035374                         | 377281            | 53.04    | 107.54   |
| 1638033_s_at | CG13653                           | ---                                         | up | 2.02 | 2.34E-02 | CG6055-RA     | FbAn031918                         | 34027             | 166.54   | 348.68   |
| 1633939_s_at | Bm1                               | Sin3A-associated polypeptide p18            | up | 2.02 | 6.81E-03 | CG13653-RA    | FbAn030486                         | 37265             | 71.52    | 136.18   |
| 1632695_s_at | CG12942                           | ---                                         | up | 2.02 | 8.14E-03 | CG6046-RA     | FbAn030486                         | 37265             | 438.24   | 883.25   |
| 1633166_s_at | CG14963                           | ---                                         | up | 2.02 | 6.88E-03 | CG12942-RA    | FbAn033569                         | 38158             | 78.92    | 159.12   |
| 1638974_s_at | CG1942                            | ---                                         | up | 2.01 | 1.06E-02 | CG14963-RA    | FbAn033408                         | 35383             | 32.69    | 65.28    |
| 1641171_s_at | Gpdh                              | beta gene                                   | up | 2.01 | 4.20E-02 | CG1942-RA     | FbAn030215                         | 39137             | 98.45    | 198.74   |
| 1629549_s_at | CG13796                           | ---                                         | up | 2.01 | 9.52E-03 | CG9042-RB     | FbAn011128                         | 33824             | 1464.61  | 2939.27  |
| 1640224_s_at | Smu4                              | CG14122                                     | up | 2.01 | 3.01E-02 | CG13796-RB    | FbAn031928                         | 40051             | 986.53   | 1977.46  |
| 1629198_s_at | Cyp4B8                            | Cytochrome P450-4b8                         | up | 2.00 | 7.32E-03 | CG14122-RA    | FbAn031124                         | 39114             | 291.14   | 611.81   |
| 1636338_s_at | CG15821                           | ---                                         | up | 2.00 | 7.95E-03 | CG4321-RA     | FbAn030333                         | 38841             | 160.62   | 321.49   |
| 1629440_s_at | CG15896                           | ---                                         | up | 2.00 | 9.09E-03 | CG15021-RA    | FbAn030444                         | 38548             | 1276.07  | 2548.21  |
| 1628289_s_at | ems                               | empty spiracles                             | up | 1.99 | 2.31E-02 | CG13895-1B    | FbAn030518                         | 39693             | 129.27   | 245.96   |
| 1634062_s_at | CG14218                           | ---                                         | up | 1.98 | 1.92E-02 | CG2988-RA     | FbAn0300576                        | 41697             | 63.68    | 126.85   |
| 1629924_s_at | CG30371                           | ---                                         | up | 1.98 | 1.92E-02 | CG14218-RB    | FbAn031031                         | 32949             | 37.84    | 74.26    |
| 1638724_s_at | CG18507                           | ---                                         | up | 1.98 | 3.01E-03 | CG3171-RA     | FbAn031710                         | 423174            | 423.17   | 433.63   |
| 1628491_s_at | CG13183 // DsmCG13183             | ---                                         | up | 1.98 | 1.44E-02 | CG18507-RA    | FbAn028527                         | 34775             |          |          |

|              |                                      |                                         |    |      |          |              |                                   |                |          |          |
|--------------|--------------------------------------|-----------------------------------------|----|------|----------|--------------|-----------------------------------|----------------|----------|----------|
| 1626334_at   | ko                                   | mitochondrial ribosomal protein S       | up | 1.80 | 7.45E-03 | CG7925-RB    | FBar0003714                       | 31228          | 725.40   | 1397.00  |
| 1637161_s_at | myoglobin                            | Myoglobin                               | up | 1.80 | 1.99E-02 | CG1833-RA    | FBar0003834                       | 33811          | 53.75    | 96.30    |
| 1624205_s_at | Tom40                                | Translocase of outer membrane 4         | up | 1.80 | 1.07E-02 | CG12157-RA   | FBar0018041                       | 44978          | 1212.00  | 2182.27  |
| 1616608_a_at | Gpzh                                 | G gene                                  | up | 1.80 | 2.52E-02 | CG9042-RB    | FBar0001128                       | 33824          | 8126.45  | 14622.93 |
| 1640710_at   | Rpt4                                 | Rpt4                                    | up | 1.79 | 4.73E-02 | CG3455-RA    | FBar0026685                       | 11967          | 4781.53  | 8575.65  |
| 1633364_s_at | CG15024                              | ---                                     | up | 1.79 | 1.08E-02 | CG15024-RA   | FBar0003890                       | 33820          | 1582.00  | 1830.00  |
| 1628087_s_at | CG10200                              | ---                                     | up | 1.79 | 4.43E-02 | CG10200-RB   | FBar0003968                       | 36648          | 1507.98  | 2697.28  |
| 1632512_at   | CG11820                              | ---                                     | up | 1.78 | 8.74E-03 | CG11820-RA   | FBar0003670                       | 43004          | 311.81   | 556.20   |
| 1628245_s_at | sem2                                 | sem2                                    | up | 1.78 | 8.84E-03 | CG16332-RA   | FBar0006132                       | 34468          | 4839.87  | 8615.45  |
| 1630919_at   | pipe                                 | pipe                                    | up | 1.78 | 1.68E-02 | CG9614-RB    | FBar0003089                       | 40104          | 174.41   | 310.88   |
| 1634162_at   | CG40198                              | ---                                     | up | 1.78 | 2.23E-03 | CG40198-RA   | FBar0003528                       | 3354222        | 2026.23  | 3608.27  |
| 1640071_at   | Odp58a                               | Odorant-binding protein 58a             | up | 1.78 | 8.85E-03 | CG11753-RA   | FBar0004463                       | 38040          | 314.84   | 5591.84  |
| 1638472_at   | Cpr25b                               | Cpr25b                                  | up | 1.78 | 3.12E-02 | CG13935-RA   | FBar0003280                       | 38240          | 314.84   | 5591.84  |
| 1630201_s_at | CG11321                              | ---                                     | up | 1.77 | 1.73E-03 | CG11321-RA   | FBar0001857                       | 33950          | 284.86   | 504.92   |
| 1637454_s_at | prp                                  | pretaporter                             | up | 1.77 | 2.58E-02 | CG1837-RA    | FBar0001032                       | 34224          | 314.84   | 5591.84  |
| 1627389_at   | ---                                  | ---                                     | up | 1.77 | 2.43E-02 | HDC0756      | ---                               | ---            | 37.59    | 66.64    |
| 1639057_s_at | CG15445                              | ---                                     | up | 1.77 | 2.48E-02 | CG15445-RA   | FBar0003161                       | 33054          | 1707.78  | 3024.99  |
| 1641169_s_at | CG11050                              | ---                                     | up | 1.77 | 3.81E-03 | CG11050-RA   | FBar0001836                       | 33924          | 241.97   | 4387.77  |
| 1631387_at   | CG30344                              | ---                                     | up | 1.77 | 3.65E-02 | CG30344-RA   | FBar0005344                       | 246552         | 1483.52  | 2623.52  |
| 1637956_at   | CG32512                              | ---                                     | up | 1.77 | 3.18E-03 | CG32512-RA   | FBar0002512                       | 33085          | 155.03   | 273.80   |
| 1628970_at   | Ugt5b                                | UDP-glycosyltransferase                 | up | 1.76 | 1.68E-02 | CG6645-RA    | FBar0006314                       | 41333          | 171.87   | 302.67   |
| 1626712_at   | ---                                  | ---                                     | up | 1.76 | 8.03E-03 | S.CL000077   | ---                               | ---            | 29.45    | 51.90    |
| 1625140_at   | NR                                   | NR                                      | up | 1.76 | 3.52E-02 | CG6698-RA    | FBar0002917                       | 43935          | 265.09   | 467.02   |
| 1628885_s_at | regucalcin                           | regucalcin                              | up | 1.76 | 6.59E-03 | CG1833-RA    | FBar0003892                       | 34155          | 225.70   | 3919.59  |
| 1629559_s_at | Atet                                 | ABC transporter expressed in trachea    | up | 1.76 | 3.25E-04 | CG2968-RA    | FBar0002076                       | 33638          | 1491.64  | 2624.71  |
| 1633716_at   | CG535                                | ---                                     | up | 1.76 | 1.35E-02 | CG535-RA     | FBar0003242                       | 34421          | 918.83   | 1616.72  |
| 1627833_at   | Cnabp                                | Cellular retinaldehyde binding protein  | up | 1.76 | 8.08E-03 | CG10646-RA   | FBar0003636                       | 38551          | 173.26   | 313.55   |
| 1631614_at   | CG5190                               | ---                                     | up | 1.76 | 1.98E-02 | CG5190-RA    | FBar0003451                       | 37124          | 140.30   | 246.63   |
| 1638006_at   | /// DmCG7077 // DmCG7077 // DmCG7077 | ---                                     | up | 1.75 | 1.16E-02 | CG7077-RA    | FBar0003846                       | 42614          | 2418.21  | 4234.51  |
| 1633040_at   | Cdnt4                                | Cdnt4                                   | up | 1.75 | 3.32E-02 | CG1393-RA    | FBar0003498                       | 33144          | 581.84   | 1581.32  |
| 1631836_at   | CG18138                              | ---                                     | up | 1.74 | 8.88E-03 | CG18138-RA   | FBar0003839                       | 40075          | 139.71   | 243.66   |
| 1630669_at   | CG7299                               | ---                                     | up | 1.74 | 8.04E-03 | CG7299-RA    | FBar0003282                       | 34468          | 1651.45  | 2819.19  |
| 1633633_s_at | CG18402 // Jupiter                   | ---                                     | up | 1.74 | 3.34E-02 | CG18402-RA   | FBar0003830                       | 35445 // 41392 | 314.84   | 5416.61  |
| 1636155_at   | CG482                                | ---                                     | up | 1.74 | 1.51E-02 | CG482-RA     | FBar0003283                       | 34468          | 33.16    | 53.16    |
| 1625958_at   | ---                                  | ---                                     | up | 1.74 | 4.18E-03 | HDC08189     | ---                               | ---            | 33.47    | 58.18    |
| 1631671_at   | CG13827                              | ---                                     | up | 1.73 | 6.74E-03 | CG13827-RA   | FBar0003908                       | 42751          | 240.06   | 416.42   |
| 1626359_at   | Trp4D                                | transcription protein-like(Trp4D)       | up | 1.73 | 1.01E-02 | CG12812-RA   | FBar0003128                       | 31898          | 200.89   | 351.41   |
| 1624210_at   | CG475                                | ---                                     | up | 1.73 | 1.35E-02 | CG475-RB     | FBar0003622                       | 38819          | 383.36   | 664.09   |
| 1636668_at   | agn2                                 | agn2                                    | up | 1.73 | 2.37E-02 | CG9972-RA    | FBar0003579                       | 38350          | 510.71   | 884.08   |
| 1629351_at   | CG8400                               | ---                                     | up | 1.73 | 8.15E-03 | CG8400-RA    | FBar0003662                       | 42389          | 289.83   | 463.89   |
| 1638562_s_at | Cyp6d5                               | Cyp6d5                                  | up | 1.73 | 6.88E-03 | CG5055-RB    | FBar0003194                       | 41706          | 4058.49  | 7003.69  |
| 1626471_s_at | CG14374 // CG14377                   | ---                                     | up | 1.73 | 3.08E-02 | CG14377-RA   | FBar0003882                       | 35445 // 41392 | 146.29   | 252.43   |
| 1630115_s_at | Hrb47F                               | Heterogeneous nuclear ribonucleoprotein | up | 1.73 | 6.82E-03 | CG12749-RA   | FBar0003638                       | 38551          | 124.29   | 214.94   |
| 1634952_s_at | CG15094                              | ---                                     | up | 1.72 | 1.48E-03 | CG15094-RA   | FBar0003492                       | 37188          | 345.18   | 594.17   |
| 1640429_s_at | CG8145                               | ---                                     | up | 1.72 | 3.07E-03 | CG8145-RA    | FBar0003353                       | 38506          | 2586.21  | 4446.88  |
| 1631571_s_at | spir                                 | spir                                    | up | 1.72 | 1.69E-02 | CG10174-RA   | FBar0003197                       | 37441          | 453.17   | 757.53   |
| 1623558_at   | Cpr49Ae                              | CG8505                                  | up | 1.71 | 8.03E-04 | CG8505-RA    | FBar0003728                       | 36351          | 5965.53  | 10227.90 |
| 1637620_s_at | CG9186                               | ---                                     | up | 1.71 | 3.94E-03 | CG9186-RB    | FBar0003206                       | 38150          | 1248.88  | 2139.19  |
| 1631411_at   | caspr                                | caspr                                   | up | 1.71 | 1.68E-02 | CG9401-RA    | FBar0003408                       | 38922          | 206.49   | 364.49   |
| 1623298_at   | CG5067                               | ---                                     | up | 1.71 | 2.93E-02 | CG6087-RA    | FBar0002828                       | 31549          | 577.82   | 981.43   |
| 1630452_at   | CG14894                              | ---                                     | up | 1.71 | 4.41E-02 | CG14894-RA   | FBar0003480                       | 38447          | 113.50   | 2012.55  |
| 1640816_at   | CG13974                              | ---                                     | up | 1.71 | 3.65E-02 | CG13974-RA   | FBar0003744                       | 42614          | 208.68   | 358.68   |
| 1633733_at   | CG3831 // DmCG3831                   | ---                                     | up | 1.71 | 3.60E-02 | CG3831-RA    | FBar0003804                       | 37648          | 165.78   | 282.92   |
| 1626787_s_at | CG17556 // CG3678                    | ---                                     | up | 1.71 | 3.24E-02 | CG17556-RA   | FBar0003461 // FBar0004204        | 42045 // 42046 | 182.75   | 3117.82  |
| 1628113_at   | CG3589                               | ---                                     | up | 1.71 | 2.91E-02 | CG3589-RA    | FBar0003636                       | 38551          | 173.26   | 313.55   |
| 1640280_at   | lola                                 | longitudinals lacking                   | up | 1.70 | 5.62E-03 | CG12052-RC   | FBar0005030                       | 44548          | 713.93   | 1216.31  |
| 1623959_at   | CG1532                               | ---                                     | up | 1.70 | 1.82E-02 | CG1532-RA    | FBar0003143                       | 33076          | 776.71   | 1362.18  |
| 1624328_s_at | set-01                               | reslin                                  | up | 1.70 | 1.82E-02 | CG1532-RA    | FBar0003143                       | 33076          | 776.71   | 1362.18  |
| 1641564_a_at | Rb97D                                | Ribonuclear protein at 97D              | up | 1.70 | 3.97E-03 | CG6354-RA    | FBar0004903                       | 43241          | 428.15   | 729.53   |
| 1640462_at   | Ho                                   | Heme oxygenase                          | up | 1.70 | 2.88E-02 | CG14716-RA   | FBar0003733                       | 41407          | 830.50   | 14137.44 |
| 1630980_at   | CG13897                              | ---                                     | up | 1.70 | 1.70E-02 | CG13897-RA   | FBar0003744                       | 42614          | 2396.15  | 3915.91  |
| 1631549_s_at | CG18278 // CG30059                   | ---                                     | up | 1.69 | 1.22E-02 | CG18278-RA   | 003838 // FBar0004245 // 36487    | 26455 // 36487 | 342.50   | 5802.72  |
| 1633379_s_at | cnc                                  | cap and collar                          | up | 1.69 | 4.50E-02 | CG17844-RC   | FBar0000038                       | 42743          | 12326.09 | 20824.01 |
| 1625122_at   | CG999c                               | Odorant-binding protein 99c             | up | 1.69 | 1.65E-03 | CG7584-RA    | FBar0003682                       | 43494          | 12326.09 | 20824.01 |
| 1634950_s_at | CG15695                              | ---                                     | up | 1.69 | 4.34E-02 | CG15695-RA   | FBar0003952                       | 43494          | 1073.46  | 1812.99  |
| 1641446_s_at | CG5171                               | ---                                     | up | 1.69 | 5.47E-04 | CG5171-RB    | FBar0001907                       | 34016          | 1073.46  | 1812.99  |
| 1627999_s_at | bar                                  | barren                                  | up | 1.69 | 2.16E-02 | CG10726-RA   | FBar0004127                       | 35267          | 127.79   | 213.73   |
| 1634951_at   | CG5707                               | ---                                     | up | 1.69 | 3.24E-02 | CG5707-RA    | FBar0003692                       | 38922          | 127.79   | 213.73   |
| 1628271_at   | CG3609                               | ---                                     | up | 1.69 | 4.38E-04 | CG3609-RA    | FBar0003148                       | 33421          | 972.18   | 1640.87  |
| 1627783_at   | CG18599                              | ---                                     | up | 1.69 | 2.87E-02 | CG18599-RA   | FBar0003892                       | 42101          | 62.97    | 106.28   |
| 1637814_s_at | AR-2                                 | Allatostatin Receptor 2                 | up | 1.68 | 9.47E-03 | CG1274-RA    | FBar0003302                       | 43393          | 121.99   | 205.53   |
| 1637814_s_at | Jlfrac2                              | Jlfrac2                                 | up | 1.68 | 9.47E-03 | CG1274-RA    | FBar0003302                       | 43393          | 121.99   | 205.53   |
| 1635110_at   | Cyp6a13                              | Cyp6a13                                 | up | 1.68 | 1.03E-03 | CG2397-RA    | FBar0003304                       | 35837          | 267.01   | 439.41   |
| 1634380_at   | CG30197                              | ---                                     | up | 1.68 | 2.91E-02 | CG30197-RA   | FBar0003974                       | 43513          | 485.13   | 823.16   |
| 1640405_at   | l(2)01810                            | lethal (2) 01810                        | up | 1.68 | 2.28E-03 | FBar00010497 | ---                               | ---            | 198.98   | 334.88   |
| 1623298_at   | Prox2                                | Proteasome subunit 20S                  | up | 1.68 | 4.39E-02 | CG4697-RA    | FBar0002284                       | 38655          | 4622.31  | 7767.48  |
| 1639115_at   | CG11380                              | ---                                     | up | 1.68 | 8.81E-03 | CG11380-RA   | FBar0003053                       | 37005          | 154.80   | 276.80   |
| 1627068_at   | Cyp4a1                               | Cyp4a1                                  | up | 1.68 | 4.83E-02 | CG8302-RA    | FBar0003053                       | 36762          | 111.89   | 187.49   |
| 1630370_at   | CG9796                               | ---                                     | up | 1.68 | 1.73E-03 | CG9796-RA    | FBar0003149                       | 41650          | 2286.47  | 3820.37  |
| 1632168_at   | Pho                                  | Phospholipase A2 activator protein      | up | 1.68 | 1.68E-02 | CG13974-RA   | FBar0003744                       | 42614          | 403.18   | 691.84   |
| 1635319_at   | Odc1                                 | ornithine decarboxylase                 | up | 1.67 | 1.22E-03 | CG8271-RA    | FBar00013307                      | 36768          | 325.05   | 541.84   |
| 1641999_at   | TXBP181-like                         | TXBP181-like                            | up | 1.66 | 2.31E-03 | CG2072-RA    | FBar0002826                       | 35954          | 321.19   | 534.78   |
| 1628133_at   | bond                                 | james bond                              | up | 1.66 | 4.47E-03 | CG6921-RB    | FBar0003885                       | 42657          | 217.10   | 3612.03  |
| 1623020_at   | CG13737                              | ---                                     | up | 1.66 | 1.31E-03 | CG13737-RA   | FBar0003190                       | 326177         | 554.10   | 921.85   |
| 1638469_s_at | CG3385                               | ---                                     | up | 1.66 | 1.61E-02 | CG3385-RA    | FBar0003286                       | 38922          | 127.79   | 213.73   |
| 1632959_s_at | Adh // Adhr                          | alcohol dehydrogenase // Adh-rel        | up | 1.66 | 1.61E-02 | CG32954-RA   | 000055 // FBar00037187 // 3712432 | 225.94         | 373.16   | ---      |
| 1640901_at   | CG675                                | ---                                     | up | 1.66 | 4.95E-02 | CG675-RA     | FBar0003870                       | 41567          | 113.29   | 191.08   |
| 1633106_at   | CG6862                               | ---                                     | up | 1.66 | 2.01E-02 | CG6862-RA    | FBar0003607                       | 38975          | 206.40   | 336.40   |
| 1641558_at   | CG31005                              | ---                                     | up | 1.66 | 8.81E-03 | CG31005-RA   | FBar0003105                       | 43007          | 115.92   | 198.98   |
| 1627399_at   | CG17266                              | ---                                     | up | 1.66 | 4.15E-02 | CG17266-RA   | FBar0003089                       | 35571          | 67.54    | 95.36    |
| 1641740_at   | CG34370                              | ---                                     | up | 1.66 | 1.68E-02 | CG34370-RA   | FBar0003089                       | 35571          | 154.80   | 276.80   |
| 1638779_s_at | CG10352                              | ---                                     | up | 1.66 | 1.13E-03 | CG10352-RA   | FBar0003348                       | 32127          | 485.94   | 841.75   |
| 1626666_s_at | RhoGAP16F                            | RhoGAP16F                               | up | 1.65 | 4.45E-02 | CG7122-RB    | FBar0003893                       | 32790          | 66.09    | 109.35   |
| 1638934_at   | /// GA12893 // CG14291               | ---                                     | up | 1.65 | 1.19E-02 | CG14291-RA   | FBar0003890                       | 42268          | 117.97   | 294.40   |
| 1630229_at   | CG6435                               | mitochondrial ribosomal protein S       | up | 1.65 | 1.41E-02 | CG7354-RA    | FBar0003400                       | 34001          | 301.31   | 562.81   |
| 1639028_at   | CG435                                | ---                                     | up | 1.65 | 1.39E-02 | CG435-RA     | FBar0003166                       | 38984          | 708.68   | 1170.65  |
| 1639222_at   | CG12123 // DmCG12123                 | ---                                     | up | 1.65 | 3.10E-02 | CG12123-RA   | FBar0003039                       | 31777          | 300.84   | 496.44   |
| 1639915_at   | CG4078                               | ---                                     | up | 1.65 | 2.81E-02 | CG4078-RA    | FBar0003786                       | 41407          | 124.29   | 214.94   |
| 1633530_s_at | CG9331                               | ---                                     | up | 1.65 | 1.81E-02 | CG9331-RB    | FBar0003289                       | 35347          | 270.05   | 4458.83  |
| 1627679_at   | CG18302                              | ---                                     | up | 1.65 | 2.36E-02 | CG18302-RA   | FBar0003286                       | 34402          | 351.28   | 609.08   |
| 1631161_at   | CG6023                               | ---                                     | up | 1.65 | 3.20E-02 | CG6023-RA    | FBar0003286                       | 34402          | 1913.63  | 3163.63  |
| 1637293_at   | CG17707                              | ---                                     | up | 1.65 | 2.88E-02 |              |                                   |                |          |          |

|              |                      |                                   |      |        |           |               |             |         |          |          |
|--------------|----------------------|-----------------------------------|------|--------|-----------|---------------|-------------|---------|----------|----------|
| 1631718_s at | mRPL12               | mitochondrial ribosomal protein L | up   | 1.57   | 2.68E-03  | CG5012-RA     | FBar0011787 | 44326   | 844.12   | 1321.27  |
| 1632059_s at | knir                 | knirps-related                    | up   | 1.57   | 2.41E-02  | CG36176-RA    | FBar0011923 | 40288   | 165.07   | 293.61   |
| 1640159_s at | ---                  | ---                               | up   | 1.56   | 6.23E-03  | CG13377-RA    | FBar0043369 | ---     | 996.10   | 1558.88  |
| 1627342_s at | CG15251              | ---                               | up   | 1.56   | 8.83E-03  | CG15251-RA    | FBar0030166 | 11930   | 96.22    | 150.52   |
| 1637027_s at | CG10165              | ---                               | up   | 1.56   | 7.53E-03  | CG10165-RA    | FBar0032801 | 35242   | 226.48   | 351.36   |
| 1630679_s at | CG26399              | ---                               | up   | 1.56   | 1.94E-02  | CG26399-RA    | FBar0033830 | ---     | 212.84   | 339.27   |
| 1629231_s at | CG42249              | CG1961                            | up   | 1.56   | 4.28E-02  | CG1961-RA     | FBar0011941 | 32043   | 77.30    | 120.88   |
| 1625297_s at | CG8128               | ---                               | up   | 1.56   | 8.54E-03  | CG8128-RA     | FBar0034668 | 32504   | 1660.50  | 2594.04  |
| 1632390_s at | ent                  | crammer                           | up   | 1.56   | 8.78E-03  | CG10463-RA    | FBar0034668 | 32504   | 1660.50  | 2594.04  |
| 1628356_s at | CG11880              | ---                               | up   | 1.56   | 1.88E-02  | CG11880-RA    | FBar0033937 | 43440   | 1344.24  | 2093.69  |
| 1635883_s at | CG9136               | ---                               | up   | 1.56   | 1.81E-02  | CG9136-RA     | FBar0038332 | 41877   | 76.93    | 114.22   |
| 1633112_s at | CG19827              | ---                               | up   | 1.56   | 4.98E-02  | CG19827-RA    | FBar0039274 | 20265   | 110.85   | 171.55   |
| 1634606_s at | mmv                  | cabrio                            | up   | 1.56   | 6.21E-04  | CG9535-RA     | FBar0298749 | 33903   | 1700.45  | 2666.40  |
| 1624616_s at | Tm                   | Tryptophan hydroxylase            | up   | 1.56   | 1.29E-04  | CG9122-RA     | FBar0038157 | 38121   | 155.97   | 242.55   |
| 1637136_s at | GaINAC-12            | GaINAC-12                         | up   | 1.56   | 5.11E-03  | CG3898-RA     | FBar0034668 | 32504   | 1660.50  | 2594.04  |
| 1624818_s at | Sply                 | Sphingosine-1-phosphatase 7       | up   | 1.56   | 1.86E-02  | CG8944-RA     | FBar0031091 | 46059   | 1127.83  | 1746.20  |
| 1629822_s at | CG15508              | ---                               | up   | 1.55   | 3.25E-02  | CG15508-RA    | FBar0033686 | 33438   | 336.82   | 520.87   |
| 1632396_s at | CG12567              | ---                               | up   | 1.54   | 2.98E-02  | CG12567-RA    | FBar0033955 | 3355904 | 701.78   | 1092.25  |
| 1629070_s at | CG1208               | ---                               | up   | 1.54   | 1.71E-02  | CG1208-RA     | FBar0031386 | 40727   | 773.32   | 1162.62  |
| 1631273_s at | CG5262               | ---                               | up   | 1.54   | 2.84E-02  | CG5262-RA     | FBar0039988 | 40258   | 441.34   | 680.43   |
| 1629431_s at | Ubc-E2H              | Ubc-E2H                           | up   | 1.54   | 2.81E-02  | CG2251-RA     | FBar0026996 | 11728   | 263.22   | 404.79   |
| 1622999_s at | set-01               | septin                            | up   | 1.54   | 3.26E-02  | CG1403-RA     | FBar0011710 | 33114   | 708.25   | 1091.12  |
| 1629023_s at | CG40191              | ---                               | up   | 1.54   | 1.97E-02  | CG40191-RC    | FBar0058191 | 3354930 | 10988.51 | 16691.90 |
| 1632623_s at | CG11242              | ---                               | up   | 1.54   | 2.48E-02  | CG11242-RA    | FBar0034445 | 32244   | 1282.43  | 1974.22  |
| 1627023_s at | CG4884               | ---                               | up   | 1.54   | 3.12E-02  | CG4884-RA     | FBar0033555 | 43357   | 1292.57  | 343.83   |
| 1633153_s at | cdc14                | CG7134                            | up   | 1.54   | 4.19E-02  | CG7134-RA     | FBar0031952 | 34067   | 166.28   | 260.37   |
| 1637038_s at | tax                  | tax                               | up   | 1.54   | 2.88E-02  | CG81158-RA    | FBar0031568 | 40983   | 81.17    | 124.84   |
| 1624695_s at | CG3999 // DaeoCG3999 | ---                               | up   | 1.54   | 4.43E-02  | CG3999-RA     | FBar0037801 | 41253   | 487.67   | 749.85   |
| 1626312_s at | CG10553              | ---                               | up   | 1.54   | 2.49E-02  | CG10553-RA    | FBar0033324 | 43064   | 1592.08  | 2446.90  |
| 1623497_s at | HLHm3                | sp11 locus enhancer protein m3    | up   | 1.54   | 8.94E-02  | CG3546-RA     | FBar0034209 | 43356   | 142.37   | 203.61   |
| 1641307_s at | CG14419              | ---                               | up   | 1.53   | 4.24E-02  | CG14419-RA    | FBar0029839 | 31276   | 1662.39  | 2551.39  |
| 1630280_s at | CG42353 // CG42354   | ---                               | up   | 1.53   | 3.68E-02  | CG42353-RA    | FBar0029839 | 31276   | 1662.39  | 2551.39  |
| 1627841_s at | CG17494              | ---                               | up   | 1.53   | 3.68E-02  | CG42353-RA    | FBar0029839 | 31276   | 1662.39  | 2551.39  |
| 1635163_s at | CG5731               | ---                               | up   | 1.53   | 1.12E-02  | CG5731-RA     | FBar0031192 | 34339   | 335.02   | 512.84   |
| 1641454_s at | CG1461               | ---                               | up   | 1.53   | 1.82E-02  | CG1461-RA     | FBar0030558 | 32381   | 2869.65  | 4392.63  |
| 1628732_s at | CG9259               | Odorant-binding protein 56p       | up   | 1.53   | 3.30E-02  | CG13873-RA    | FBar0034474 | 31270   | 2863.43  | 4381.81  |
| 1624981_s at | CG11075              | proliferation-associated protein  | up   | 1.53   | 1.63E-02  | CG10516-RA    | FBar0034474 | 31270   | 2863.43  | 4381.81  |
| 1633970_s at | Hsp87Ba              | Gene 1                            | up   | 1.53   | 3.93E-02  | CG4178-RA     | FBar0001227 | 39076   | 111.38   | 170.07   |
| 1633092_s at | cup                  | cup                               | up   | 1.53   | 2.45E-02  | CG11181-RA    | FBar0001227 | 39076   | 111.38   | 170.07   |
| 1637172_s at | CG10958              | ---                               | up   | 1.53   | 7.78E-03  | CG10958-RA    | FBar0031974 | 31739   | 950.38   | 1449.69  |
| 1627835_s at | Cda5                 | CG31973                           | up   | 1.52   | 4.89E-02  | CG31973-RA    | FBar0031973 | 33138   | 1904.73  | 2900.49  |
| 1627693_s at | CG1965               | ---                               | up   | 1.52   | 7.28E-04  | CG1965-RA     | FBar0031486 | 40842   | 498.70   | 759.08   |
| 1639751_s at | ---                  | ---                               | up   | 1.52   | 2.68E-02  | RS4504        | ---         | ---     | 1163.02  | 1753.22  |
| 1630729_s at | tefu                 | telomere fusion                   | up   | 1.52   | 2.11E-02  | CG6535-RA     | FBar0040536 | 41839   | 123.34   | 187.70   |
| 1641106_s at | CG17928              | ---                               | up   | 1.52   | 2.39E-02  | CG17928-RA    | FBar0042803 | 33023   | 618.85   | 941.31   |
| 1633701_s at | CG16695              | ---                               | up   | 1.52   | 8.62E-05  | CG16695-RA    | FBar0033582 | 33023   | 588.68   | 900.21   |
| 1626337_s at | ---                  | ---                               | up   | 1.52   | 2.67E-02  | CG3592        | ---         | ---     | 83.40    | 126.72   |
| 1636151_s at | CG32196              | ---                               | up   | 1.52   | 3.56E-03  | CG32196-RA    | FBar0052196 | 317908  | 206.74   | 313.65   |
| 1631925_s at | Mims                 | P-glycoprotein6-Dm                | up   | 1.52   | 1.23E-03  | CG10115-RA    | FBar0011613 | 29413   | 174.33   | 261.33   |
| 1634170_s at | jug                  | flavin                            | up   | 1.52   | 4.23E-02  | CG30052-RB    | FBar0028371 | 43957   | 510.29   | 760.22   |
| 1636440_s at | Sip1                 | SHY interacting protein 1         | up   | 1.52   | 2.79E-03  | CG10939-RA    | FBar0010620 | 44155   | 1061.61  | 1677.13  |
| 1633275_s at | Obse6e               | Obse6e-binding protein 56e        | up   | 1.52   | 0.00E-03  | CG86625-RA    | FBar0034474 | 31270   | 1001.24  | 1513.67  |
| 1639795_s at | sac6                 | sac6                              | up   | 1.51   | 4.68E-02  | CG5341-RA     | FBar0033467 | 37142   | 231.64   | 350.64   |
| 1630348_s at | CG5959               | ---                               | up   | 1.51   | 3.20E-02  | CG5959-RA     | FBar0037007 | 40278   | 5403.38  | 8165.26  |
| 1632075_s at | pcd2                 | CG31453                           | up   | 1.51   | 6.53E-02  | CG14453-RA    | FBar0034474 | 31270   | 143.13   | 215.12   |
| 1625683_s at | CG5112               | ---                               | up   | 1.51   | 7.30E-03  | CG5112-RA     | FBar0033341 | 43083   | 690.99   | 1043.43  |
| 1632839_s at | CG8312               | ---                               | up   | 1.51   | 6.69E-03  | CG8312-RA     | FBar0037240 | 41163   | 655.58   | 987.69   |
| 1640128_s at | sem-A                | ---                               | up   | 1.51   | 2.44E-02  | CG17947-RA    | FBar0034474 | 31270   | 143.13   | 215.12   |
| 1630408_s at | CG7033               | Spindle-A                         | up   | 1.50   | 2.09E-03  | CG7033-RC     | FBar0030388 | 31838   | 1038.02  | 2011.03  |
| 1628852_s at | Myp10A               | Mycosin XV                        | up   | 1.50   | 1.33E-02  | CG2174-RA     | FBar0030322 | 32028   | 501.42   | 753.52   |
| 1626590_s at | Oborf7a              | Odorant-binding protein 57a       | up   | 1.50   | 7.71E-02  | CG8104-RA     | FBar0034474 | 31270   | 143.13   | 215.12   |
| 1641400_s at | CG5710               | ---                               | up   | 1.50   | 2.81E-02  | CG5710-RA     | FBar0030716 | 32533   | 1015.62  | 1522.18  |
| 1633684_s at | CG32444              | aldose 1-epimerase                | up   | 1.50   | 1.74E-03  | CG32444-RA    | FBar0043783 | 40406   | 4357.18  | 6542.02  |
| 1634087_s at | CG1311               | ---                               | up   | 1.50   | 6.18E-04  | CG1311-RA     | FBar0033523 | 38523   | 469.84   | 705.33   |
| 1632298_s at | mfs                  | Midline Fasciclin                 | down | 1.50   | 3.98E-02  | CG33565-RB    | FBar0031455 | 32414   | 840.14   | 330.21   |
| 1624057_s at | CG16713              | ---                               | down | 1.50   | 4.23E-02  | CG16713-RA    | FBar0031560 | 33591   | 4607.77  | 9.97     |
| 1626086_s at | CG2177               | ---                               | down | 119.00 | 2.77E-04  | CG2177-RA     | FBar0033902 | 43788   | 1031.33  | 8.67     |
| 1633386_s at | mtm8                 | Mtm-like 8                        | down | 119.15 | 7.26E-03  | CG13702-RA    | FBar0033902 | 43788   | 1031.33  | 8.67     |
| 1629585_s at | Oas2                 | Oas2                              | down | 75.94  | 2.03E-02  | CG1148-RB     | FBar0037410 | 40766   | 726.70   | 9.57     |
| 1629362_s at | mtm8                 | Mtm-like 8                        | down | 71.80  | 3.25E-03  | CG2475-RA     | FBar0032474 | 38011   | 481.40   | 6.70     |
| 1627511_s at | Ata // Atb           | attacin // attacin                | down | 59.28  | 2.15E-04  | CG10939-RA    | FBar0010620 | 44155   | 1163.02  | 1753.22  |
| 1632719_s at | CecC                 | Cecropin                          | down | 48.93  | 4.82E-02  | CG1372-RA     | FBar0000279 | 45999   | 2938.79  | 69.07    |
| 1634633_s at | ---                  | ---                               | down | 32.54  | 8.71E-04  | Transposon 54 | ---         | ---     | 8125.32  | 249.62   |
| 1631915_s at | CG3397               | ---                               | down | 29.55  | CG3397-RA | FBar0030775   | 41454       | 272.19  | 10.26    |          |
| 1626530_s at | CecB                 | Cecropin B                        | down | 19.09  | 2.92E-02  | CG1878-RA     | FBar0000278 | 43598   | 2058.03  | 10.58    |
| 1641419_s at | Atc                  | attacin                           | down | 18.48  | 2.23E-02  | CG4740-RA     | FBar0041579 | 36454   | 28310.48 | 1369.88  |
| 1627121_s at | Ata                  | attacin                           | down | 17.15  | 4.11E-03  | CG10939-RA    | FBar0010620 | 44155   | 1163.02  | 1753.22  |
| 1638887_s at | CG40298              | ---                               | down | 17.17  | 1.04E-03  | CG40298-RA    | FBar0030536 | 3355149 | 419.97   | 24.46    |
| 1634310_s at | TprC4                | TprC4                             | down | 16.51  | 2.00E-04  | CG12408-RA    | FBar0033027 | 35488   | 222.00   | 13.45    |
| 1631982_s at | Mmd                  | Metallothionein D                 | down | 14.87  | 6.68E-02  | CG33112-RA    | FBar0031670 | 43320   | 113.15   | 171.15   |
| 1634551_s at | CG5188               | ---                               | down | 14.17  | 6.11E-03  | CG5188-RA     | FBar0038074 | 41111   | 4443.01  | 313.61   |
| 1624393_s at | w                    | white                             | down | 13.39  | 1.29E-02  | CG2758-RA     | FBar0003996 | 31271   | 272.84   | 20.38    |
| 1632545_s at | PGRP-SD              | PGRP-SD                           | down | 12.91  | 8.88E-02  | CG17495-RA    | FBar0034474 | 31270   | 143.13   | 215.12   |
| 1631693_s at | CG9616               | ---                               | down | 12.26  | 2.08E-02  | CG9616-RA     | FBar0038214 | 41731   | 641.09   | 52.30    |
| 1640955_s at | ---                  | ---                               | down | 12.25  | 6.53E-03  | Transposon 34 | ---         | ---     | 93.25    | 7.61     |
| 1632231_s at | Dnr                  | dipteran-like protein             | down | 11.51  | 8.12E-02  | CG10780-RA    | FBar0034407 | 37184   | 18343.88 | 1654.31  |
| 1627759_s at | CG30080              | ---                               | down | 10.98  | 2.26E-03  | CG30080-RA    | FBar0030800 | 248441  | 3079.46  | 486.41   |
| 1639112_s at | CG9080               | ---                               | down | 10.98  | 2.26E-03  | CG9080-RA     | FBar0030800 | 248441  | 3079.46  | 486.41   |
| 1624818_s at | ---                  | ---                               | down | 10.05  | 6.00E-02  | Transposon 17 | ---         | ---     | 2935.61  | 293.51   |
| 1627736_s at | Actbeta              | actin-beta                        | down | 9.56   | 1.40E-04  | CG11062-RA    | FBar0024913 | 43826   | 1000.20  | 104.66   |
| 1639402_s at | scribble             | scribble                          | down | 9.45   | 3.95E-03  | CG5468-RA     | FBar0044487 | 44448   | 112.58   | 9.82     |
| 1638002_s at | CG4757               | ---                               | down | 9.24   | 2.11E-02  | CG4757-RA     | FBar0033524 | 38523   | 186.78   | 937.94   |
| 1629242_x at | ---                  | ---                               | down | 8.31   | 7.21E-03  | Transposon 33 | ---         | ---     | 488.67   | 58.82    |
| 1635331_s at | CG494A               | CG8510                            | down | 8.14   | 6.94E-04  | CG8510-RA     | FBar0032729 | 36352   | 136.10   | 16.72    |
| 1633987_s at | CG33523              | NSP protein                       | down | 7.89   | 2.05E-03  | CG33523-RA    | FBar0034263 | 38958   | 3003.24  | 8.37     |
| 1626490_s at | PGRP-SB1             | PGRP-SB1                          | down | 7.72   | 1.64E-02  | CG9681-RA     | FBar0043578 | 39870   | 14076.17 | 1823.80  |
| 1631311_s at | Mtk                  | Metchnikowin                      | down | 7.32   | 1.33E-02  | CG8175-RA     | FBar0014885 | 36708   | 3164.60  | 4284.33  |
| 1630633_s at | fru                  | fructose                          | down | 7.04   | 2.98E-03  | CG14302-RA    | FBar0041923 | 41222   | 193.63   | 29.26    |
| 1630375_s at | CG13130              | ---                               | down | 6.81   | 4.37E-03  | CG13130-RA    | FBar0040965 | 50439   | 290.29   | 42.62    |
| 1629307_s at | Mec2                 | Mec2                              | down | 6.42   | 1.07E-02  | CG7633-RA     | FBar0031993 | 32905   | 653.97   | 101.80   |
| 1629297_s at | CG9027               | ---                               | down | 6.20   | 2.48E-03  | CG13203-RA    | FBar0034631 | 36232   | 691.80   | 119.16   |
| 1638428_s at | ---                  | ---                               | down | 6.16   | 3.19E-03  | Transposon 33 | ---         | ---     | 101.35   | 16.47    |
| 1626147_s at | ---                  | ---                               | down | 6.13   | 4.90E-06  | CG12891-RA    | FBar0027842 | 3127    |          |          |

|              |                                                                         |                                                   |      |      |          |               |                                             |                   |          |          |
|--------------|-------------------------------------------------------------------------|---------------------------------------------------|------|------|----------|---------------|---------------------------------------------|-------------------|----------|----------|
| 1628757_at   | Glut1                                                                   | glucose transporter 1                             | down | 3.34 | 3.47E-04 | CG1086-RA     | FBar0025593                                 | 38109             | 538.97   | 161.13   |
| 1628935_at   | ---                                                                     | ---                                               | down | 3.31 | 3.50E-03 | Transposon44  | ---                                         | ---               | 568.23   | 168.55   |
| 1634729_at   | IQ37Cd                                                                  | CG10563                                           | down | 3.34 | 1.90E-03 | CG10563-RA    | FBar0088445                                 | 35103             | 197.63   | 59.24    |
| 1631115_at   | Obp8a                                                                   | Odorant-binding protein 8a                        | down | 3.30 | 1.93E-02 | CG12685-RA    | FBar0030103                                 | 11800             | 336.06   | 101.73   |
| 1632921_at   | CG30050                                                                 | ---                                               | down | 3.30 | 6.74E-03 | CG30050-RA    | FBar0050050                                 | 24647             | 657.90   | 199.36   |
| 1640778_at   | ---                                                                     | ---                                               | down | 3.29 | 8.17E-04 | ---           | ---                                         | ---               | 451.19   | 133.36   |
| 1640540_at   | CG30273                                                                 | ---                                               | down | 3.26 | 4.20E-03 | CG30273-RA    | FBar0050273                                 | 246520            | 409.84   | 125.54   |
| 1625067_at   | CG32280                                                                 | ---                                               | down | 3.26 | 3.21E-02 | CG32280-RA    | FBar0052280                                 | 317943            | 122.86   | 37.87    |
| 1641729_at   | CG13043                                                                 | ---                                               | down | 3.25 | 8.18E-03 | CG13043-RA    | FBar0030430                                 | 33078             | 444.93   | 133.67   |
| 1631468_a_at | tim                                                                     | TIMELESS                                          | down | 3.20 | 1.21E-03 | CG3234-RC     | FBar0014396                                 | 33571             | 139.12   | 43.41    |
| 1629013_at   | CG11436                                                                 | ---                                               | down | 3.20 | 1.55E-03 | CG11436-RA    | FBar0020713                                 | 13398             | 291.95   | 86.01    |
| 1639110_at   | Cyp421                                                                  | Cyp421                                            | down | 3.19 | 4.41E-02 | CG8715-RA     | FBar0011263                                 | 24038             | 772.97   | 242.63   |
| 1633825_at   | CG14221                                                                 | ---                                               | down | 3.19 | 1.49E-03 | CG14221-RC    | FBar0031042                                 | 32961             | 174.84   | 54.74    |
| 1640775_a_at | Nmdmc                                                                   | NAD-dependent methylenetetrahydrofolate reductase | down | 3.19 | 1.85E-03 | CG18466-RA    | FBar0010222                                 | 27895             | 3599.03  | 1125.74  |
| 1641052_at   | Acv32A                                                                  | ---                                               | down | 3.18 | 1.23E-04 | CG18572-RA    | FBar0018572                                 | 41732             | 317.82   | 159.16   |
| 1628174_a_at | nmb1                                                                    | CG33119                                           | down | 3.15 | 4.48E-04 | CG33119-RA    | FBar0021229                                 | 34813             | 198.09   | 62.98    |
| 1627784_at   | ---                                                                     | ---                                               | down | 3.12 | 2.10E-03 | GM07606       | ---                                         | ---               | 527.06   | 166.96   |
| 1628264_at   | CG13000                                                                 | ---                                               | down | 3.10 | 1.01E-02 | CG13000-RA    | FBar0030807                                 | 32985             | 471.10   | 151.21   |
| 1640029_s_at | CG14669                                                                 | ---                                               | down | 3.08 | 1.50E-02 | HDC11911      | FBar0037326                                 | 40652             | 32.05    | 10.40    |
| 1635591_at   | Nija                                                                    | ninjurin A                                        | down | 3.08 | 3.72E-02 | CG6449-RA     | FBar0038101                                 | 39215             | 2098.25  | 678.61   |
| 1630555_at   | CG33348                                                                 | ---                                               | down | 3.04 | 6.85E-03 | CG33348-RA    | FBar0053348                                 | 278960            | 106.36   | 34.06    |
| 1638645_at   | CG9662                                                                  | ---                                               | down | 3.04 | 3.53E-04 | CG9662-RA     | FBar0031529                                 | 33554             | 348.34   | 114.73   |
| 1626492_s_at | Sop2                                                                    | Suppressor of profilin 2                          | down | 3.03 | 1.84E-03 | CG6978-R6     | FBar0001961                                 | 34793             | 1574.72  | 518.88   |
| 1633795_at   | CG11425                                                                 | ---                                               | down | 3.02 | 1.23E-04 | CG11425-RA    | FBar0030797                                 | 40472             | 1774.27  | 588.04   |
| 1641657_s_at | CG12424                                                                 | ---                                               | down | 3.02 | 3.40E-03 | CG12424-RC    | FBar0033887                                 | 38673             | 997.55   | 330.45   |
| 1628839_at   | CG17110                                                                 | ---                                               | down | 3.02 | 1.91E-02 | CG17110-RA    | FBar0030350                                 | 42729             | 65.31    | 21.65    |
| 1628015_at   | cnq1                                                                    | CN3 channel-like                                  | down | 3.02 | 3.98E-03 | CG9193-RC     | FBar0029080                                 | 23448             | 247.03   | 81.93    |
| 1639611_at   | ---                                                                     | ---                                               | down | 3.00 | 7.34E-05 | RE24931       | ---                                         | ---               | 177.94   | 59.35    |
| 1627271_at   | CG13422 // CG7655                                                       | ---                                               | down | 2.99 | 1.81E-02 | CG13422-RA    | FBar0034511                                 | 37313 // 42128    | 1974.97  | 659.45   |
| 1639180_at   | Anc1                                                                    | CG12505                                           | down | 2.98 | 3.50E-03 | CG12505-RA    | FBar0032605                                 | 32438             | 106.54   | 284.55   |
| 1640144_at   | CG18067                                                                 | ---                                               | down | 2.98 | 1.42E-02 | CG18067-RA    | FBar0034512                                 | 37314             | 31243.19 | 10546.63 |
| 1629784_a_at | Myo28B1                                                                 | myosin VII 28B1-4                                 | down | 2.96 | 1.49E-03 | CG6978-RC     | FBar0040299                                 | 33515             | 254.15   | 85.99    |
| 1639949_at   | IM10                                                                    | immune induced molecule 10                        | down | 2.94 | 1.71E-03 | HDC16384      | ---                                         | ---               | 31.47    | 91.07    |
| 1628510_s_at | ---                                                                     | ---                                               | down | 2.94 | 4.03E-04 | CG18279-RB    | ---                                         | ---               | 364.66   | 202.79   |
| 1635965_at   | CG3604                                                                  | ---                                               | down | 2.93 | 2.28E-02 | CG3604-RA     | FBar0031562                                 | 33593             | 421.05   | 143.61   |
| 1625074_at   | CG12486                                                                 | ---                                               | down | 2.93 | 2.14E-02 | CG12486-RA    | FBar0032641                                 | 38729             | 289.92   | 86.92    |
| 1630255_at   | CG31878                                                                 | ---                                               | down | 2.93 | 7.78E-03 | CG31878-RA    | FBar0031878                                 | 34351             | 446.55   | 499.59   |
| 1626966_s_at | ---                                                                     | ---                                               | down | 2.92 | 7.83E-03 | Transposon 82 | ---                                         | ---               | 126.16   | 126.16   |
| 1630651_at   | ---                                                                     | ---                                               | down | 2.91 | 3.18E-02 | S.CG900941    | ---                                         | ---               | 55.42    | 19.01    |
| 1637662_at   | meta                                                                    | meta                                              | down | 2.89 | 3.11E-03 | CG3290-RA     | FBar0053548                                 | 31200             | 451.23   | 159.24   |
| 1624688_at   | CG9360 // DsmC/CG9360                                                   | ---                                               | down | 2.87 | 1.04E-02 | CG9360-RC     | FBar0030332                                 | 32128             | 154.06   | 52.95    |
| 1626579_at   | CG5195                                                                  | ---                                               | down | 2.87 | 8.67E-03 | CG5195-RA     | FBar0030995                                 | 40268             | 182.22   | 50.43    |
| 1634256_at   | CG11866 // wgl1                                                         | ---                                               | down | 2.87 | 3.25E-02 | CG11866-RA    | 0031159 // FBar000318004                    | 318064 // 3772393 | 160.36   | 56.16    |
| 1634406_at   | CG32982                                                                 | ---                                               | down | 2.85 | 7.24E-03 | CG32982-RC    | FBar0052982                                 | 34237             | 384.64   | 136.12   |
| 1627191_a_at | ena                                                                     | enabled                                           | down | 2.83 | 1.64E-03 | CG15112-RC    | FBar0000578                                 | 31201             | 946.44   | 333.98   |
| 1624075_at   | CG58949                                                                 | ---                                               | down | 2.83 | 9.03E-03 | CG58949-RA    | FBar0030463                                 | 41087             | 625.26   | 61.36    |
| 1624953_at   | Cyp12c1                                                                 | Cyp12c1                                           | down | 2.82 | 2.03E-02 | CG4120-RA     | FBar0038806                                 | 40037             | 651.54   | 230.94   |
| 1639374_s_at | Amyc-4 // Amyc-p                                                        | Amyc-4 // Amyc-p                                  | down | 2.81 | 1.30E-02 | CG18730-RA    | 0000078 // FBar0003693                      | 36933 // 47764    | 1123.52  | 399.67   |
| 1639354_at   | normn                                                                   | CG11413                                           | down | 2.81 | 1.48E-03 | CG11413-RA    | FBar0032931                                 | 42013             | 143.26   | 143.26   |
| 1641619_at   | CG34057                                                                 | ---                                               | down | 2.80 | 2.90E-02 | CG13904-RA    | FBar0054057                                 | 388545            | 127.52   | 45.62    |
| 1629753_at   | Kr                                                                      | Kruppel                                           | down | 2.80 | 1.51E-02 | CG3344-RA     | FBar0001325                                 | 38012             | 55.99    | 20.03    |
| 1638071_at   | Chp80                                                                   | cap binding protein 80                            | down | 2.79 | 7.18E-02 | CG10324-RA    | FBar0030324                                 | 39418             | 138.88   | 138.88   |
| 1635283_s_at | nmb2                                                                    | CG18339                                           | down | 2.79 | 1.66E-02 | CG18339-RA    | FBar0028844                                 | 260645            | 2347.77  | 841.51   |
| 1633419_s_at | CG7341                                                                  | ---                                               | down | 2.78 | 2.88E-02 | CG7341-RA     | FBar0037777                                 | 40004             | 69.93    | 25.16    |
| 1627375_at   | Rel1                                                                    | relish                                            | down | 2.78 | 3.08E-03 | CG10324-RA    | FBar0030324                                 | 39418             | 138.88   | 138.88   |
| 1636409_at   | CG11034                                                                 | ---                                               | down | 2.78 | 2.09E-02 | CG11034-RA    | FBar0031741                                 | 33810             | 60.84    | 21.91    |
| 1629740_at   | CG33828 // Hst1/CG33831 // Hst1/CG33831 // Hst1/CG33831 // Hst1/CG33831 | ---                                               | down | 2.78 | 3.67E-02 | CG31617-RA    | /// FBar0053831 // 1912 // 371981 // 371798 | 790.35            | 281.09   | 281.09   |
| 1627489_at   | CG10433                                                                 | ---                                               | down | 2.77 | 1.30E-02 | CG10433-RA    | FBar0030463                                 | 41087             | 127.17   | 44.13    |
| 1636073_at   | CG32344                                                                 | ---                                               | down | 2.75 | 6.28E-03 | CG32344-RA    | FBar0052344                                 | 326208            | 120.12   | 75.15    |
| 1638581_at   | Ubin                                                                    | CG14224                                           | down | 2.74 | 0.50E-05 | CG14224-RA    | FBar0031057                                 | 32977             | 201.56   | 118.00   |
| 1640436_at   | Hts                                                                     | CG14670                                           | down | 2.74 | 3.06E-02 | CG14670-RA    | FBar0031232                                 | 40689             | 346.76   | 246.76   |
| 1623218_s_at | Alb                                                                     | Albamba                                           | down | 2.72 | 3.73E-03 | CG10710-RA    | FBar0031471                                 | 40850             | 171.57   | 63.02    |
| 1632478_a_at | Pkc53E                                                                  | protein kinase C                                  | down | 2.69 | 5.71E-03 | CG6622-RB     | FBar0003091                                 | 48311             | 2137.66  | 793.84   |
| 1623109_at   | CG4583                                                                  | ---                                               | down | 2.69 | 3.76E-03 | CG4583-RA     | FBar0026929                                 | 31649             | 290.37   | 92.99    |
| 1630936_s_at | scs                                                                     | scabrous                                          | down | 2.68 | 1.59E-02 | CG17978-RA    | FBar0031878                                 | 39418             | 138.88   | 77.91    |
| 1626061_at   | CG34123                                                                 | ---                                               | down | 2.68 | 7.80E-03 | CG30078-RA    | FBar0039599                                 | 36694             | 189.90   | 70.94    |
| 1639530_at   | CG14528                                                                 | ---                                               | down | 2.68 | 1.83E-03 | CG14528-RA    | FBar0033611                                 | 43410             | 400.06   | 148.48   |
| 162695_s_at  | ---                                                                     | ---                                               | down | 2.67 | 3.74E-02 | CG14583-RA    | FBar0040638                                 | 45172             | 151.72   | 59.54    |
| 1630524_at   | ---                                                                     | ---                                               | down | 2.66 | 2.33E-02 | LP09564       | ---                                         | ---               | 1171.71  | 440.32   |
| 1631534_at   | el                                                                      | diet-wingless                                     | down | 2.66 | 1.37E-03 | CG8338-RA     | FBar0020251                                 | 38736             | 279.62   | 105.13   |
| 1629173_at   | CG17189                                                                 | ---                                               | down | 2.64 | 4.32E-03 | CG17189-RA    | FBar0030463                                 | 41087             | 138.88   | 138.88   |
| 1637432_s_at | CG3097                                                                  | ---                                               | down | 2.64 | 2.18E-03 | CG3097-RA     | FBar0029804                                 | 31503             | 753.62   | 285.52   |
| 1631635_at   | CG7294                                                                  | ---                                               | down | 2.63 | 3.93E-02 | CG7294-RA     | FBar0031284                                 | 34470             | 338.62   | 128.52   |
| 1623265_at   | CG14180                                                                 | ---                                               | down | 2.63 | 3.04E-02 | CG14180-RA    | FBar0031603                                 | 39117             | 69.26    | 29.89    |
| 1638836_at   | CG12512                                                                 | ---                                               | down | 2.63 | 6.68E-03 | CG12512-RA    | FBar0031703                                 | 33776             | 69.26    | 264.92   |
| 1638504_s_at | ---                                                                     | ---                                               | down | 2.60 | 6.80E-04 | CG13879       | ---                                         | ---               | 231.91   | 89.18    |
| 1630255_at   | ---                                                                     | ---                                               | down | 2.59 | 1.08E-02 | RN04985       | FBar0002961                                 | ---               | 151.72   | 59.54    |
| 1635844_at   | CG15887                                                                 | ---                                               | down | 2.59 | 2.68E-02 | CG15887-RA    | FBar0031262                                 | 41631             | 154.63   | 56.74    |
| 1628942_at   | CG15385                                                                 | ---                                               | down | 2.58 | 7.06E-03 | CG15385-RA    | FBar0031397                                 | 33396             | 266.25   | 103.00   |
| 1630544_at   | ---                                                                     | ---                                               | down | 2.57 | 1.81E-02 | HDC16384      | ---                                         | ---               | 45.29    | 13.07    |
| 1632629_s_at | CG2217                                                                  | ---                                               | down | 2.57 | 7.31E-05 | CG2217-RA     | FBar0021744                                 | 43607             | 3450.46  | 1237.24  |
| 1632430_at   | Tsf1                                                                    | Transferrin 1                                     | down | 2.56 | 3.98E-02 | CG6186-RA     | FBar0022355                                 | 32821             | 16294.26 | 6348.19  |
| 1628313_at   | CG14453                                                                 | ---                                               | down | 2.56 | 2.18E-02 | HDC16384      | FBar0031615                                 | 42418             | 311.83   | 89.18    |
| 1630441_at   | CG12716                                                                 | ---                                               | down | 2.55 | 8.16E-04 | CG12716-RA    | FBar0030439                                 | 32248             | 83.99    | 32.93    |
| 1632761_at   | beat-III // CG34106                                                     | beat-III // ---                                   | down | 2.54 | 8.91E-04 | HDC02919      | FBar0083842                                 | 35035 // 4378981  | 257.77   | 101.29   |
| 1627769_at   | CG30287                                                                 | ---                                               | down | 2.54 | 1.03E-02 | CG30287-RA    | FBar0030287                                 | 32654             | 44.13    | 13.59    |
| 1634438_at   | Pph13                                                                   | Munster                                           | down | 2.53 | 5.01E-04 | CG2819-RA     | FBar0021839                                 | 33239             | 815.39   | 321.86   |
| 1630651_at   | CG9344                                                                  | ---                                               | down | 2.53 | 3.95E-03 | CG9344-RA     | FBar0034564                                 | 37372             | 366.38   | 144.87   |
| 1624036_at   | CG13795 // DsmC/CG13795                                                 | ---                                               | down | 2.53 | 4.15E-03 | CG13795-RA    | FBar0031837                                 | 33649             | 163.26   | 64.76    |
| 1638891_at   | Ets2C                                                                   | Ets at 21C                                        | down | 2.52 | 1.62E-02 | CG2914-RA     | FBar0030439                                 | 32248             | 520.83   | 198.98   |
| 1631627_at   | CG5335 // Fbp1                                                          | --- // Protein-1                                  | down | 2.53 | 6.63E-04 | CG5335-RA     | FBar0034366                                 | 37140 // 39566    | 366.13   | 144.88   |
| 1639454_s_at | period                                                                  | period                                            | down | 2.53 | 1.46E-02 | CG3036-RA     | FBar0030366                                 | 31241             | 480.20   | 190.20   |
| 1638996_at   | CG3352                                                                  | ---                                               | down | 2.53 | 1.03E-02 | CG3352-RA     | FBar0035552                                 | 39007             | 820.48   | 324.83   |
| 1631370_at   | CG30026                                                                 | ---                                               | down | 2.51 | 4.43E-03 | CG30026-RA    | FBar0030026                                 | 246399            | 1518.90  | 600.51   |
| 1638865_at   | CG34360                                                                 | ---                                               | down | 2.51 | 1.92E-02 | S.CG181077    | ---                                         | ---               | 80.63    | 24.14    |
| 1639314_at   | CG12802                                                                 | ---                                               | down | 2.49 | 1.71E-03 | CG12818-RA    | 0040536 // FBar00025                        | 41217             | 62.54    | 23.54    |
| 1629399_at   | CG10383                                                                 | ---                                               | down | 2.48 | 1.47E-03 | CG10383-RA    | FBar0020299                                 | 35123             | 1278.97  | 515.55   |
| 1636273_s_at | kek5                                                                    | kek5-like                                         | down | 2.45 | 3.41E-03 | CG12199-RC    | FBar0031016                                 | 32930             | 547.41   | 223.12   |
| 1641293_at   | Knop-4                                                                  | Knop-4                                            | down | 2.45 | 1.45E-02 | CG19136-RA    | FBar0031386                                 | 40909             | 755.84   | 309.27   |
| 1637658_at   | mth3                                                                    | mth-like 3                                        | down | 2.45 | 3.73E-02 | CG6533-RA     | FBar0028956                                 | 36981             | 50.68    | 20.68    |
| 1624802_at   | CG31886                                                                 | ---                                               | down | 2.45 | 4.93E-02 | CG31886-RA    | FBar0031886                                 | 31888             | 10.40    | 28.64    |
| 1637462_at   | CG13833                                                                 | ---                                               | down | 2.44 | 2.83E-02 | CG13833-RA    | FBar0031833                                 | 42418             | 233.28   | 89.18    |
| 1640758_at   | CG32613                                                                 | ---                                               | down | 2.44 | 3.81E-03 | CG32613-RA    | FBar0026113                                 | 318117            | 254.92   | 104.56   |
| 1629295_at   | pgam4                                                                   | polypeptide GalNAc transferase 4                  | down | 2.43 | 4.31E-02 | CG31          |                                             |                   |          |          |

|              |                              |                                  |      |      |          |                 |                   |                  |          |          |
|--------------|------------------------------|----------------------------------|------|------|----------|-----------------|-------------------|------------------|----------|----------|
| 1632431_s_at | Anca                         | anon-fast-evolving-3D10          | down | 2.05 | 3.40E-03 | CG8827-RA       | Fbano012037       | 34805            | 1606.44  | 929.09   |
| 1624103_s_at | CG36114                      | ---                              | down | 2.25 | 3.98E-02 | CG4959-RA       | Fbano028954       | 437985           | 30.41    | 30.41    |
| 1640947_s_at | CG15376                      | ---                              | down | 2.05 | 9.68E-03 | CG15376-RA      | Fbano028952       | 31354            | 110.48   | 53.99    |
| 1639537_s_at | CG4587                       | ---                              | down | 2.05 | 1.53E-02 | CG4587-RA       | Fbano028863       | 34921            | 145.74   | 71.26    |
| 1629469_s_at | CG10960                      | ---                              | down | 2.04 | 9.26E-03 | CG10960-RC      | Fbano030316       | 39458            | 3956.29  | 1936.77  |
| 1638444_s_at | Bmpc                         | Bmpc                             | down | 2.04 | 9.34E-03 | CG13418-RA      | Fbano021189       | 32012            | 443.21   | 182.59   |
| 1636616_s_at | Or3a                         | Odorant receptor 3a              | down | 2.04 | 1.79E-02 | CG9969-RA       | Fbano033382       | 38354            | 224.65   | 110.06   |
| 1623707_s_at | CG1673                       | ---                              | down | 2.04 | 2.96E-03 | CG1673-RA       | Fbano030462       | 32207            | 2063.97  | 1021.13  |
| 1624696_s_at | Rbp2                         | anon-fast-evolving-1B9           | down | 2.04 | 2.78E-03 | CG4422-RA       | Fbano042926       | 348929           | 369.57   | 184.25   |
| 1624911_s_at | Cyp28a2                      | ---                              | down | 2.04 | 1.88E-03 | CG6081-RA       | Fbano031488       | 33748            | 200.23   | 98.25    |
| 1626563_s_at | CG14253                      | ---                              | down | 2.04 | 2.12E-03 | CG14253-RC      | Fbano030487       | 42343            | 341.74   | 167.72   |
| 1639232_s_at | CG13150                      | ---                              | down | 2.03 | 2.62E-03 | CG13150-RC      | Fbano031487       | 36937            | 369.37   | 184.25   |
| 1636061_s_at | ---                          | ---                              | down | 2.03 | 5.02E-04 | GM08821         | ---               | ---              | 2231.70  | 1096.94  |
| 1623875_s_at | CG3434                       | ---                              | down | 2.03 | 1.06E-03 | CG3434-RA       | Fbano030000       | 39038            | 420.82   | 207.05   |
| 1624695_s_at | CG4586A18356                 | --- // GA18356                   | down | 2.03 | 8.31E-03 | CG4586-RA       | Fbano031487       | 42343            | 1311.23  | 443.21   |
| 1636682_s_at | CG31778                      | ---                              | down | 2.03 | 1.39E-02 | CG31778-RA      | Fbano037800       | 42616            | 865.51   | 427.23   |
| 1635416_s_at | CG31100                      | ---                              | down | 2.03 | 9.25E-05 | CG31100-RA      | Fbano051100       | 41075            | 921.80   | 455.17   |
| 1631176_s_at | CG4267                       | ---                              | down | 2.02 | 1.74E-02 | CG4267-RA       | Fbano031405       | 33445            | 1344.5   | 492.68   |
| 1624466_s_at | CG15117                      | ---                              | down | 2.01 | 6.25E-04 | CG15117-RA      | Fbano034417       | 37197            | 366.78   | 182.07   |
| 1632894_s_at | CG33967                      | ---                              | down | 2.01 | 4.40E-04 | CG12600-RA      | Fbano035967       | 41763            | 94.07    | 46.70    |
| 1626284_s_at | RecQ                         | Drosophila homolog of RecQ       | down | 2.01 | 9.08E-03 | CG4837-RA       | Fbano021176       | 39534            | 306.24   | 153.33   |
| 1640674_s_at | lr2a                         | CG15627                          | down | 2.01 | 4.10E-02 | CG15627-RA      | Fbano031634       | 33683            | 104.72   | 52.19    |
| 1639019_s_at | CG33470 // IM10              | --- // Immune induced molecule 1 | down | 2.00 | 1.14E-02 | Dm_ZR_1292.10   | 003835 // Fbano00 | 2768831 // 36486 | 23187.79 | 11615.07 |
| 1623080_s_at | CG18410                      | ---                              | down | 2.00 | 1.47E-04 | CG18410-RA      | Fbano030426       | 42053            | 911.33   | 458.69   |
| 1628572_s_at | stps                         | suppressor (rdp) 59              | down | 1.99 | 1.07E-03 | CG31006-RB      | Fbano038670       | 43633            | 2366.26  | 1203.33  |
| 1631315_s_at | CG12730                      | ---                              | down | 1.98 | 1.22E-03 | CG12730-RA      | Fbano029771       | 31468            | 1971.47  | 995.90   |
| 1636162_s_at | sf                           | suppressing factor               | down | 1.98 | 2.18E-02 | CG8148-RA       | Fbano029692       | 38146            | 1472.43  | 744.48   |
| 1641322_s_at | Pde9                         | Phosphodiesterase 9              | down | 1.98 | 3.80E-02 | CG32648-RA      | Fbano029171       | 32233            | 212.04   | 107.26   |
| 1625162_s_at | CG4611                       | ---                              | down | 1.97 | 3.49E-04 | CG4611-RA       | Fbano033591       | 38901            | 275.78   | 139.85   |
| 1639136_s_at | pan                          | panique                          | down | 1.97 | 8.95E-03 | CG30983-RB      | Fbano030389       | 38901            | 446.88   | 228.81   |
| 1632524_s_at | CG7787                       | ---                              | down | 1.97 | 8.18E-03 | CG7787-RA       | Fbano032501       | 34142            | 529.57   | 259.81   |
| 1641415_s_at | ---                          | ---                              | down | 1.97 | 1.14E-02 | RH47344         | ---               | ---              | 75.92    | 38.57    |
| 1639384_s_at | CG9850                       | ---                              | down | 1.97 | 1.68E-03 | CG9850-RA       | Fbano050939       | 31860            | 234.61   | 119.32   |
| 1636170_s_at | CG14440                      | ---                              | down | 1.96 | 1.57E-02 | CG14440-RA      | Fbano029894       | 31610            | 294.55   | 150.02   |
| 1628113_s_at | CG4080                       | ---                              | down | 1.96 | 1.64E-03 | CG4080-RA       | Fbano035983       | 39079            | 898.39   | 457.59   |
| 1624543_s_at | cina                         | ---                              | down | 1.96 | 1.16E-02 | Transposon_32   | ---               | ---              | 2596.96  | 1323.28  |
| 1632100_s_at | CG4936                       | anon-fast-evolving-2H7           | down | 1.96 | 9.40E-03 | CG4936-RA       | Fbano033410       | 39884            | 1086.64  | 549.66   |
| 1623194_s_at | CG7637                       | ---                              | down | 1.95 | 4.38E-02 | CG7637-RA       | Fbano033548       | 38135            | 889.13   | 455.00   |
| 1627007_s_at | CG4306                       | ---                              | down | 1.95 | 1.90E-02 | CG4306-RA       | Fbano030787       | 40017            | 695.01   | 356.22   |
| 1627050_s_at | CG14154 // CG6709            | ---                              | down | 1.95 | 1.15E-02 | CG6709-RA       | 003656 // Fbano00 | 39166 // 39167   | 39166    | 199.83   |
| 1639725_s_at | unc-115                      | unc-115                          | down | 1.95 | 1.93E-03 | CG13332-RC      | Fbano033741       | 41178            | 4339.11  | 2230.73  |
| 1628847_s_at | CG17167                      | ---                              | down | 1.95 | 2.85E-02 | CG14016-RA      | Fbano033941       | 335499           | 165.40   | 85.01    |
| 1632432_s_at | CG31846                      | ---                              | down | 1.95 | 2.82E-02 | CG31846-RA      | Fbano031897       | 31897            | 309.50   | 309.50   |
| 1630609_s_at | CG2225                       | ---                              | down | 1.94 | 2.50E-02 | CG2225-RB       | Fbano032957       | 35421            | 501.47   | 258.23   |
| 1639174_s_at | ---                          | ---                              | down | 1.94 | 1.08E-02 | CG32952-RA      | Fbano032957       | 35421            | 77.80    | 40.00    |
| 1632094_s_at | HDAC4                        | HDAC4                            | down | 1.93 | 2.10E-03 | CG11703-RA      | Fbano041210       | 32278            | 1072.41  | 553.63   |
| 1622925_s_at | ---                          | ---                              | down | 1.93 | 4.63E-03 | CG15319-RB      | Fbano015624       | ---              | 580.84   | 300.24   |
| 1635575_s_at | ---                          | ---                              | down | 1.93 | 8.67E-03 | CG40032-RA      | Fbano030582       | 38901            | 106.41   | 56.17    |
| 1631560_s_at | CG34400                      | CG17368                          | down | 1.93 | 2.74E-02 | CG23115-RA      | Fbano058429       | 39533            | 289.35   | 144.26   |
| 1640976_s_at | Ykt6                         | Ykt6                             | down | 1.93 | 6.32E-04 | CG1515-RA       | Fbano028664       | 31706            | 773.84   | 401.09   |
| 1630614_s_at | ---                          | ---                              | down | 1.93 | 7.41E-04 | HDC11981        | ---               | ---              | 3280.69  | 1703.75  |
| 1633883_s_at | ---                          | ---                              | down | 1.92 | 1.32E-02 | HDC12231        | ---               | ---              | 152.78   | 79.38    |
| 1641220_s_at | prom                         | prominin                         | down | 1.92 | 8.85E-03 | CG30165-RA      | Fbano029210       | 246493           | 214.92   | 111.75   |
| 1629467_s_at | pan                          | panopolin                        | down | 1.92 | 1.91E-04 | CG32005-RA      | Fbano038432       | 43769            | 354.51   | 184.35   |
| 1633218_s_at | USP                          | UTP-G-LP uridylyltransferase     | down | 1.92 | 1.13E-02 | CG4347-RC       | Fbano034987       | 39045            | 289.65   | 139.63   |
| 1638078_s_at | Side                         | similar to Deadpan               | down | 1.91 | 7.73E-03 | CG10446-RA      | Fbano032741       | 39188            | 725.20   | 379.37   |
| 1624440_s_at | ---                          | ---                              | down | 1.91 | 3.44E-02 | AM01482         | ---               | ---              | 389.26   | 203.73   |
| 1629050_s_at | ---                          | ---                              | down | 1.91 | 3.82E-02 | CG6852-RA       | Fbano030389       | 38901            | 141.88   | 68.49    |
| 1629923_s_at | gl                           | glass                            | down | 1.90 | 6.58E-03 | CG1672-RB       | Fbano004618       | 42210            | 626.34   | 328.92   |
| 1623877_s_at | CG31883                      | ---                              | down | 1.90 | 4.79E-02 | CG31883-RA      | Fbano031883       | 261823           | 407.91   | 214.32   |
| 1623634_s_at | Imm                          | Immune induced molecule 4        | down | 1.90 | 2.68E-03 | CG16201-RA      | Fbano041653       | 50726            | 2228.92  | 1094.04  |
| 1623016_s_at | CG1299                       | ---                              | down | 1.90 | 5.00E-02 | CG1299-RA       | Fbano034501       | 39019            | 1380.19  | 711.69   |
| 1633959_s_at | CG9345 // CG9766 // DmCG9766 | --- // --- // ---                | down | 1.90 | 7.98E-03 | Transposon_10   | Fbano037229       | 246555 // 40539  | 1880.90  | 991.83   |
| 1634669_s_at | CG32333                      | ---                              | down | 1.90 | 4.89E-02 | CG32333-RA      | Fbano035333       | 38142            | 365.64   | 187.67   |
| 1633901_s_at | ---                          | ---                              | down | 1.90 | 8.01E-02 | GHI2056         | ---               | ---              | 493.00   | 250.66   |
| 1638366_s_at | ---                          | ---                              | down | 1.88 | 6.09E-04 | HDC20114        | ---               | ---              | 225.57   | 119.77   |
| 1624375_s_at | east                         | enhanced adult sensory threshold | down | 1.88 | 2.25E-03 | CG4398-RB       | Fbano010110       | 46026            | 861.04   | 468.24   |
| 1624450_s_at | Sm4                          | ---                              | down | 1.88 | 2.65E-04 | CG9453-RA       | Fbano030582       | 38901            | 198.55   | 100.37   |
| 1632997_s_at | CG34127                      | Drosokinin receptor              | down | 1.88 | 4.44E-02 | CG32465-RB      | Fbano039363       | 40912            | 262.55   | 150.26   |
| 1638675_s_at | CG10680                      | ---                              | down | 1.88 | 1.06E-02 | CG10680-RA      | Fbano032836       | 35262            | 6536.10  | 3479.55  |
| 1629071_s_at | Lip3                         | Lip3                             | down | 1.87 | 1.21E-02 | CG8823-RA       | Fbano034945       | 41843            | 451.83   | 234.81   |
| 1630755_s_at | ---                          | ---                              | down | 1.87 | 3.77E-02 | AFFX-Dm-Act5C-s | ---               | ---              | 1247.31  | 665.41   |
| 1630075_s_at | dp                           | clumpy                           | down | 1.87 | 3.59E-03 | CG31196-RB      | Fbano053196       | 318824           | 1297.83  | 693.11   |
| 1629070_s_at | not                          | neuropeptide F                   | down | 1.87 | 2.68E-02 | CG11004-RA      | Fbano033322       | 44218            | 493.18   | 253.63   |
| 1634488_s_at | CG16743                      | ---                              | down | 1.85 | 2.33E-02 | CG16743-RA      | Fbano033322       | 44218            | 1176.23  | 634.56   |
| 1627854_s_at | CG9914 // DmCG9914           | Enoyl-CoA hydratase mitochondr   | down | 1.85 | 9.13E-03 | CG9914-RA       | Fbano030727       | 32522            | 5585.41  | 3018.72  |
| 1640117_s_at | CG30154                      | ---                              | down | 1.85 | 8.68E-02 | CG30154-RA      | Fbano031158       | 414447           | 689.55   | 349.85   |
| 1627367_s_at | CG5653                       | ---                              | down | 1.85 | 9.21E-03 | CG5653-RA       | Fbano035943       | 39024            | 526.78   | 284.99   |
| 1623327_s_at | ---                          | ---                              | down | 1.85 | 4.05E-02 | S.CG2R01709     | ---               | ---              | 3637.07  | 1969.51  |
| 1638303_s_at | Mip                          | irostatin-B2                     | down | 1.84 | 1.45E-02 | CG8456713       | Fbano036673       | 39033            | 132.78   | 41.76    |
| 1627653_s_at | (1)G0469                     | lethal (1) G0469                 | down | 1.84 | 1.14E-02 | CG32597-RA      | Fbano040153       | 32371            | 219.57   | 119.61   |
| 1633558_s_at | CG14997                      | ---                              | down | 1.84 | 8.89E-04 | CG14997-RB      | Fbano033515       | 38514            | 787.18   | 427.74   |
| 1629320_s_at | CG8125                       | ---                              | down | 1.84 | 1.08E-04 | CG8125-RA       | Fbano031883       | 261823           | 407.91   | 214.32   |
| 1635852_s_at | Pde11                        | Phosphodiesterase 11             | down | 1.84 | 1.22E-02 | CG10231-RA      | Fbano038370       | 38107            | 1094.13  | 555.74   |
| 1624375_s_at | CG3227                       | insensitive                      | down | 1.83 | 3.93E-02 | CG3227-RA       | Fbano031434       | 33441            | 128.47   | 70.16    |
| 1632986_s_at | CG3392                       | ---                              | down | 1.83 | 3.89E-02 | CG3392-RA       | Fbano030629       | 38699            | 2869.69  | 2189.92  |
| 1627279_s_at | nwk                          | nervous wreck                    | down | 1.83 | 4.23E-02 | CG4684-RA       | Fbano033986       | 39052            | 236.96   | 129.77   |
| 1631371_s_at | Pde8                         | Phosphodiesterase 8              | down | 1.82 | 6.45E-03 | CG5411-RA       | Fbano034886       | 37741            | 238.14   | 130.62   |
| 1628789_s_at | CG13618                      | ---                              | down | 1.82 | 3.47E-02 | CG13618-RA      | Fbano031883       | 261823           | 407.91   | 214.32   |
| 1632171_s_at | CG30303 // kappaB-Ras        | --- // kappaB-Ras                | down | 1.82 | 1.80E-03 | CG30303-RA      | 004613 // Fbano00 | 246566 // 35667  | 1488.18  | 810.10   |
| 1632225_s_at | inx7                         | innexin7                         | down | 1.81 | 3.86E-02 | CG2977-RB       | Fbano029716       | 33027            | 86.90    | 47.35    |
| 1641570_s_at | CG1866 // CG31683            | ---                              | down | 1.80 | 9.84E-02 | CG1866-RA       | 004218 // Fbano00 | 26162 // 326109  | 264.23   | 146.25   |
| 1624746_s_at | CG31643                      | ---                              | down | 1.80 | 3.93E-02 | CG31643-RA      | Fbano031883       | 261823           | 174.02   | 91.00    |
| 1623265_s_at | CG10513                      | ---                              | down | 1.80 | 1.05E-02 | CG10513-RA      | Fbano039311       | 43051            | 645.64   | 359.43   |
| 1625170_s_at | CG9001                       | ---                              | down | 1.79 | 1.13E-02 | CG9001-RA       | Fbano032628       | 38224            | 381.32   | 212.46   |
| 1632360_s_at | fat1h                        | fanor                            | down | 1.79 | 8.71E-04 | CG22512-RA      | Fbano034942       | 41843            | 531.76   | 282.53   |
| 1636053_s_at | s-cup                        | stanley-cup                      | down | 1.79 | 2.02E-02 | CG32394         | Fbano050044       | 36371            | 65.28    | 36.48    |
| 1629249_s_at | pep                          | hindsight                        | down | 1.79 | 2.33E-02 | CG1212-RA       | Fbano030353       | 31391            | 639.53   | 357.44   |
| 1627150_s_at | CG3056                       | ---                              | down | 1.79 | 9.71E-04 | CG3056-RA       | Fbano030967       | 31089            | 140.25   | 59.25    |
| 1633017_s_at | fat3                         | Transferrin 3                    | down | 1.78 | 3.78E-02 | CG3665-RA       | Fbano034904       | 36800            | 531.44   | 298.08   |
| 1640746_s_at | pan                          | panopolin                        | down | 1.78 | 2.11E-03 | CG18542-RA      | 003731 // Fbano00 | 318260 // 41176  | 2437.52  | 1370.46  |
| 1629636_s_at | pan                          | panopolin                        | down | 1.78 | 3.25E-02 | CG1796-RA       | Fbano031883       | 261823           | 407.91   | 214.32   |
| 1623137_s_at | dpr8                         | dpr8                             | down | 1.77 | 6.92E-03 | CG136309        | Fbano050200</     |                  |          |          |

|              |                                   |                                     |      |      |          |                         |                         |                   |         |
|--------------|-----------------------------------|-------------------------------------|------|------|----------|-------------------------|-------------------------|-------------------|---------|
| 1640335_s at | CG42788                           | ---                                 | down | 1.69 | 6.71E-04 | CG31304-RA              | Fbgn001304              | 63521             | 376.96  |
| 1639489_s at | CG3700 // Dmnc1370 // MED23       | --- // --- // Mediator complex subu | down | 1.68 | 6.71E-04 | CG3700-RA               | 0034795 // Fbgn003700   | 37639 // 37640    | 391.98  |
| 1627837_s at | CG5227                            | ---                                 | down | 1.68 | 4.59E-02 | CG5227-RA               | Fbgn003594              | 43326             | 226.66  |
| 1640822_s at | nr54B                             | quaking related 54B                 | down | 1.68 | 1.30E-02 | CG4818-RA               | Fbgn002987              | 36966             | 422.35  |
| 1623465_s at | CG42574                           | CG17735                             | down | 1.68 | 8.89E-04 | CG17735-RA              | Fbgn0005619             | 40586             | 154.55  |
| 1634865_s at | Hsc                               | histone deacetylase                 | down | 1.68 | 1.33E-03 | CG3454-RA               | Fbgn0005619             | 30426             | 1758.66 |
| 1636675_s at | SK                                | small conductance calcium-activat   | down | 1.68 | 2.59E-02 | CG19054                 | Fbgn0029781             | 31456             | 68.05   |
| 1624564_s at | bot                               | CG14105                             | down | 1.67 | 3.18E-02 | CG14105-RA              | Fbgn0011206             | 38048             | 190.90  |
| 1623177_s at | G4962 // DmauCG4962 // DmncCG4962 | --- // --- // ---                   | down | 1.67 | 2.08E-04 | CG4962-RA               | Fbgn0006354             | 30426             | 1814.67 |
| 1625624_s at | CG14105                           | CG14105                             | down | 1.67 | 6.19E-05 | CG14105-RA              | Fbgn0032441             | 42473             | 969.26  |
| 1631392_s at | CG11089                           | Gene 1                              | down | 1.67 | 3.42E-03 | CG11089-RA              | Fbgn0032441             | 42473             | 969.26  |
| 1629898_s at | CG10137                           | CG10137                             | down | 1.67 | 8.84E-04 | CG10137-RA              | Fbgn0032441             | 42473             | 5193.86 |
| 1623980_s at | dpr3                              | dpr3                                | down | 1.67 | 1.92E-03 | CG15379-RA              | Fbgn0032441             | 346208            | 98.06   |
| 1637031_s at | ade3                              | Complementation group D             | down | 1.67 | 4.57E-02 | Transposon 40           | Fbgn0000053             | 33396             | 248.57  |
| 1628965_s at | CG31743 // CG34313                | CG31743                             | down | 1.67 | 3.30E-04 | CG31743-RA              | 0032618 // Fbgn0032618  | 32616 // 5740766  | 1271.65 |
| 1630514_s at | Oprk1                             | rhodopsin kinase                    | down | 1.67 | 4.04E-04 | CG40129-RA              | Fbgn0004833             | 3355013           | 1618.35 |
| 1628950_s at | Mind4                             | 11beta drug resistance 49           | down | 1.67 | 1.51E-02 | CG38718-RA              | Fbgn0004512             | 39424             | 767.77  |
| 1628160_s at | domino                            | domino                              | down | 1.66 | 9.91E-04 | CG6996-RA               | Fbgn0020306             | 45655             | 612.08  |
| 1624377_s at | be                                | E protein                           | down | 1.66 | 1.63E-02 | Transposon 84           | Fbgn0029944             | 32430             | 1133.69 |
| 1629590_s at | Grac                              | Gustatory receptor 64c              | down | 1.66 | 1.73E-02 | CG22366-RA              | Fbgn0045477             | 11474             | 75.79   |
| 1627828_s at | CG34315 // lat                    | --- // Origin recognition complex s | down | 1.66 | 4.36E-02 | CG4088-RA               | 0006954 // Fbgn0036454  | 36454 // 5740282  | 57.46   |
| 1629619_s at | Aats-trp // sage                  | Tryptophan-tRNA synthetase //       | down | 1.66 | 2.92E-02 | CG9735-RA               | Fbgn0010803             | 41105 // 45399    | 183.47  |
| 1641500_s at | ---                               | ---                                 | down | 1.65 | 4.10E-02 | Dm-530707.0             | ---                     | ---               | 124.04  |
| 1641069_s at | CG10703                           | CG10703-RA                          | down | 1.65 | 2.70E-02 | CG10703-RA              | Fbgn0037881             | 41350             | 305.42  |
| 1640667_s at | Cyp1aa1                           | transcription unit 1                | down | 1.65 | 4.71E-02 | CG10755-RA              | Fbgn0015036             | 31103             | 212.75  |
| 1639525_s at | King-nubby                        | King-nubby                          | down | 1.65 | 3.95E-02 | CG9398-RA               | Fbgn0015221             | 37400             | 223.64  |
| 1627082_s at | CG15465                           | Tubby-like                          | down | 1.65 | 1.08E-02 | CG15465-RA              | Fbgn0029746             | 31434             | 727.73  |
| 1631964_s at | CG18262                           | ---                                 | down | 1.65 | 1.68E-02 | CG18262-RA              | Fbgn0030012             | 31745             | 124.54  |
| 1641723_s at | PDP1-LC                           | hidium                              | down | 1.65 | 1.65E-02 | CG4432-RA               | Fbgn0030012             | 31745             | 792.23  |
| 1633888_s at | Nhe2                              | Nhe2                                | down | 1.65 | 1.77E-02 | CG9265-RA               | Fbgn0040229             | 39376             | 82.12   |
| 1633958_s at | CG42365                           | ---                                 | down | 1.65 | 1.48E-02 | CG15675-RA              | Fbgn0029711             | 37469             | 336.78  |
| 1623566_s at | CG17788                           | ---                                 | down | 1.65 | 3.56E-03 | CG17788-RA              | Fbgn0012876             | 34020             | 848.00  |
| 1625276_s at | Esp17C                            | methionine-S-sulfoxide reductase    | down | 1.64 | 3.10E-02 | CG17266-RC              | Fbgn0005565             | 39675             | 1177.22 |
| 1630733_s at | CG42322                           | CG15690                             | down | 1.64 | 4.02E-02 | CG12033-RA              | Fbgn0029222             | 42455             | 1148.78 |
| 1628496_s at | dpr16                             | dpr16                               | down | 1.64 | 2.56E-02 | CG12691-RA              | Fbgn0031295             | 40618             | 179.45  |
| 1641284_s at | CG6966                            | CG6966                              | down | 1.64 | 1.84E-02 | CG6966-RA               | Fbgn0009924             | 38985             | 811.10  |
| 1625666_s at | ---                               | ---                                 | down | 1.64 | 1.78E-02 | HDC10777                | ---                     | ---               | 635.87  |
| 1633565_s at | CG3741                            | ---                                 | down | 1.64 | 1.97E-03 | CG1741-RA               | Fbgn0033615             | 36208             | 282.01  |
| 1633696_s at | CG15927                           | ---                                 | down | 1.64 | 1.51E-03 | CG12917-RA              | Fbgn0033615             | 36208             | 139.19  |
| 1628232_s at | Camta                             | Calmodulin-binding transcription a  | down | 1.64 | 1.67E-02 | CG8809-RA               | Fbgn0029234             | 35074             | 219.50  |
| 1638010_s at | cnj1                              | CNG channel-like                    | down | 1.63 | 1.36E-02 | CG9176-RA               | Fbgn0020909             | 32468             | 382.02  |
| 1624520_s at | Iz-11                             | Iz-11 interacting protein 1         | down | 1.63 | 3.65E-03 | CG4052-RA               | Fbgn0030245             | 39045             | 394.85  |
| 1633181_s at | osm-1                             | osm-1                               | down | 1.63 | 4.45E-02 | CG13809-RA              | Fbgn0033317             | 38282             | 73.20   |
| 1631364_s at | CG33696                           | ---                                 | down | 1.63 | 2.39E-02 | CG3047-RA               | Fbgn0033695             | 38127             | 137.17  |
| 1629420_s at | siz                               | schizo                              | down | 1.63 | 7.25E-03 | CG13217-RA              | Fbgn0033695             | 38127             | 403.07  |
| 1636974_s at | dip                               | Dally-like                          | down | 1.63 | 3.73E-04 | CG32146-RA              | Fbgn0041604             | 39596             | 1138.89 |
| 1630399_s at | CG12054                           | ---                                 | down | 1.63 | 4.15E-03 | MG03661                 | ---                     | ---               | 790.43  |
| 1628650_s at | CG12054                           | ---                                 | down | 1.63 | 1.69E-02 | CG12054-RA              | Fbgn0033681             | 43934             | 1024.07 |
| 1633036_s at | CG32495 // GS                     | --- // Glutathione Synthetase       | down | 1.63 | 6.54E-04 | CG32495-RA              | 0030882 // Fbgn0031805  | 31805 // 32715    | 1506.39 |
| 1628812_s at | CG14132                           | ---                                 | down | 1.63 | 1.99E-02 | CG14132-RA              | Fbgn0040817             | 50290             | 2369.89 |
| 1633994_s at | CG34402                           | CG17793                             | down | 1.63 | 3.85E-02 | CG34402-RA              | Fbgn0028422             | 41513             | 129.76  |
| 1624959_s at | CG3588                            | ---                                 | down | 1.63 | 1.74E-02 | HDC19722                | ---                     | ---               | 97.84   |
| 1640924_s at | CG3588                            | ---                                 | down | 1.63 | 6.15E-03 | CG3588-RA               | Fbgn0025681             | 48421             | 1465.54 |
| 1632009_s at | CG3853                            | ---                                 | down | 1.63 | 7.25E-03 | CG3853-RA               | Fbgn0030286             | 39536             | 1173.65 |
| 1637582_s at | Nedd4                             | Nedd4                               | down | 1.62 | 3.29E-02 | CG1555-RC               | Fbgn0029174             | 39958             | 1325.79 |
| 1631206_s at | CG8405                            | ---                                 | down | 1.62 | 1.47E-03 | CG8405-RA               | Fbgn0034071             | 36772             | 261.09  |
| 1629510_s at | rutabaga                          | rutabaga                            | down | 1.62 | 1.95E-02 | CG32001-RA              | Fbgn0030301             | 39045             | 309.93  |
| 1620003_s at | Hsp98A                            | Protein tyrosine phosphatase 99A    | down | 1.62 | 1.10E-03 | CG2005-RA               | Fbgn0040399             | 43409             | 152.59  |
| 1627632_s at | CG17777                           | ---                                 | down | 1.62 | 2.27E-03 | CG17777-RA              | Fbgn0040399             | 43409             | 512.46  |
| 1634789_s at | CG11399                           | ---                                 | down | 1.62 | 3.66E-02 | CG11399-RA              | Fbgn0030286             | 39536             | 103.80  |
| 1633835_s at | CG31674                           | ---                                 | down | 1.62 | 2.59E-02 | CG31674-RA              | Fbgn001674              | 31878             | 201.49  |
| 1630217_s at | CG13650                           | ---                                 | down | 1.62 | 9.30E-03 | CG13650-RA              | Fbgn0039277             | 43014             | 1587.24 |
| 1634223_s at | ---                               | ---                                 | down | 1.61 | 3.96E-02 | S-CR000865              | ---                     | ---               | 44.38   |
| 1629103_s at | CG11899 // DsmcD21426             | --- // CG11899                      | down | 1.61 | 2.38E-03 | CG11899-RA              | Fbgn0014427             | 46391             | 88.25   |
| 1632935_s at | CG10157                           | ---                                 | down | 1.61 | 2.03E-02 | CG10157-RA              | Fbgn0030909             | 41748             | 2537.40 |
| 1630065_s at | CG9812                            | ---                                 | down | 1.61 | 1.04E-02 | CG9812-RA               | Fbgn0030909             | 41748             | 675.96  |
| 1629202_s at | CG14425 // Sxl                    | --- // sex-lethal                   | down | 1.61 | 8.84E-03 | CG30370 // Fbgn00377198 | 0038590 // Fbgn00377198 | 377198 // 3772180 | 3132.27 |
| 1630473_s at | CG12541                           | ---                                 | down | 1.61 | 1.52E-02 | HDC17784                | ---                     | ---               | 223.27  |
| 1641362_s at | CG13759                           | ---                                 | down | 1.61 | 3.19E-02 | CG13759-RA              | Fbgn0040376             | 31236             | 166.89  |
| 1636756_s at | nonA                              | phospholipase C                     | down | 1.61 | 3.85E-02 | CG36205-RA              | Fbgn0030306             | 39045             | 139.02  |
| 1627300_s at | para                              | paralytic                           | down | 1.61 | 1.72E-02 | CG9907-RA               | Fbgn0030306             | 39045             | 681.29  |
| 1624373_s at | Crp-1                             | Circadianly Regulated Gene          | down | 1.61 | 4.54E-02 | CG32788-RA              | 0021738 // Fbgn0021738  | 43900             | 183.16  |
| 1639424_s at | Vhl1                              | Vhl1                                | down | 1.61 | 3.24E-02 | CG32788-RA              | 0021738 // Fbgn0021738  | 43900             | 139.02  |
| 1628009_s at | fas                               | fant sausage                        | down | 1.61 | 5.14E-03 | CG17716-RA              | Fbgn0000633             | 36521             | 1037.26 |
| 1638751_s at | CG4004                            | ---                                 | down | 1.61 | 3.24E-02 | CG4004-RA               | Fbgn0030418             | 32228             | 250.91  |
| 1638484_s at | CG6024                            | ---                                 | down | 1.61 | 3.24E-02 | CG6024-RA               | Fbgn0030418             | 32228             | 156.57  |
| 1638280_s at | ---                               | ---                                 | down | 1.61 | 3.26E-02 | CG12789                 | ---                     | ---               | 350.38  |
| 1632245_s at | Spn4                              | neuroserpin                         | down | 1.60 | 2.33E-02 | CG9453-RA               | Fbgn0028985             | 48605             | 1469.44 |
| 1634131_s at | Mnt                               | Mnt                                 | down | 1.60 | 7.44E-03 | CG13318-RC              | Fbgn0030286             | 39536             | 599.26  |
| 1629423_s at | ics                               | Ras suppressor-1                    | down | 1.60 | 1.09E-03 | CG9031-RA               | Fbgn0028546             | 34774             | 1471.53 |
| 1631704_s at | CG5905                            | ---                                 | down | 1.60 | 1.61E-03 | CG5905-RA               | Fbgn0032923             | 42950             | 1325.65 |
| 1633409_s at | Plex-C1                           | protein kinase A                    | down | 1.60 | 1.60E-02 | CG43370-RA              | Fbgn0032923             | 42950             | 234.07  |
| 1623036_s at | CG10249                           | ---                                 | down | 1.60 | 6.01E-03 | CG10249-RC              | Fbgn0027598             | 36658             | 2416.59 |
| 1641662_s at | nacrAlpha34E                      | Dlpha34E                            | down | 1.60 | 4.97E-02 | CG32975-RA              | Fbgn0028875             | 34826             | 800.60  |
| 1625971_s at | rd5                               | LPS-responsive kinase               | down | 1.60 | 1.10E-03 | CG4292-RA               | Fbgn0030286             | 39536             | 389.40  |
| 1635713_s at | CG13185                           | ---                                 | down | 1.59 | 1.55E-02 | CG13185-RA              | Fbgn0033861             | 39288             | 293.54  |
| 1635623_s at | Cpr73D                            | CG9666                              | down | 1.59 | 5.60E-04 | CG9666-RA               | Fbgn0036880             | 39897             | 827.60  |
| 1634789_s at | CG30151                           | ---                                 | down | 1.59 | 3.65E-02 | CG30151-RA              | Fbgn0030151             | 24894             | 531.76  |
| 1639476_s at | gatz2                             | gatzenneg                           | down | 1.59 | 1.29E-02 | CG9487-RA               | Fbgn0033714             | 39337             | 110.41  |
| 1638475_s at | mnb                               | minibrain                           | down | 1.59 | 2.97E-02 | CG34946                 | ---                     | ---               | 32771   |
| 1628742_s at | CG13575 // DmncCG13575 // nord    | --- // --- // nord                  | down | 1.59 | 4.89E-02 | HDC10915                | 0034996 // Fbgn0037882  | 37882 // 37883    | 414.08  |
| 1629242_s at | ---                               | ---                                 | down | 1.59 | 4.89E-02 | HDC10915                | ---                     | ---               | 53.74   |
| 1629187_s at | Brf                               | Brf                                 | down | 1.59 | 1.25E-02 | CG13266-RA              | Fbgn0038499             | 42067             | 373.75  |
| 1633011_s at | crp                               | cropped                             | down | 1.59 | 2.23E-02 | CG17681-RA              | Fbgn0001994             | 34956             | 225.01  |
| 1638302_s at | Hb                                | Hb                                  | down | 1.59 | 3.89E-02 | CG13962-RA              | Fbgn0033811             | 39811             | 827.14  |
| 1638049_s at | Hdac3                             | CG31119                             | down | 1.58 | 4.63E-02 | CG31119-RA              | Fbgn0011119             | 326120            | 155.47  |
| 1641473_s at | Fas3                              | Fasciclin III                       | down | 1.58 | 3.85E-02 | CG5803-RA               | Fbgn0003036             | 35007             | 120.89  |
| 1629995_s at | gsh                               | gsh                                 | down | 1.58 | 7.01E-04 | CG5803-RA               | Fbgn0003036             | 35007             | 497.01  |
| 1633100_s at | SamDc                             | S-adenosylmethionine decarboxyl     | down | 1.58 | 1.16E-03 | CG5028-RA               | Fbgn0019932             | 34396             | 729.39  |
| 1638194_s at | CG13022                           | ---                                 |      |      |          |                         |                         |                   |         |

|              |         |                                   |      |      |          |            |             |        |         |         |
|--------------|---------|-----------------------------------|------|------|----------|------------|-------------|--------|---------|---------|
| 1640366_at   | CG5608  | ---                               | down | 1.51 | 3.78E-02 | CG5608-RA  | FBan0038058 | 41543  | 392.41  | 260.08  |
| 1629454_s_at | chrimo  | Chronologically inappropriate mol | down | 1.51 | 4.35E-02 | CG1686-RD  | FBan0089758 | 33343  | 513.49  | 340.48  |
| 1638999_at   | rno     | rhinoceros                        | down | 1.51 | 6.55E-03 | CG7036-RA  | FBan0035106 | 38027  | 221.98  | 147.30  |
| 1637110_at   | CG3618  | ---                               | down | 1.51 | 2.00E-02 | CG3618-RA  | FBan0037028 | 40303  | 1749.64 | 1161.27 |
| 1635360_at   | CG10630 | ---                               | down | 1.51 | 9.74E-03 | CG10630-RA | FBan0038829 | 42478  | 3063.63 | 2033.44 |
| 1633392_at   | CG8449  | ---                               | down | 1.51 | 7.49E-03 | CG8449-RA  | FBan0038129 | 41638  | 655.13  | 434.88  |
| 1637636_at   | DppEcr  | DppEcr                            | down | 1.51 | 3.92E-02 | CG18314-RA | FBan0035538 | 38539  | 1846.35 | 1226.13 |
| 1634105_at   | CG11686 | ---                               | down | 1.51 | 3.11E-02 | CG11686-RA | FBan0040551 | 50264  | 1096.65 | 728.62  |
| 1633862_at   | Sodh-1  | Sorbitol dehydrogenase like       | down | 1.50 | 4.89E-02 | CG1982-RA  | FBan0024299 | 40836  | 2781.37 | 1853.23 |
| 1633498_at   | CG7188  | ---                               | down | 1.50 | 3.69E-02 | CG7188-RB  | FBan0036871 | 38936  | 73.95   | 49.18   |
| 1634083_at   | Nf1     | neurofibromatosis type 1          | down | 1.50 | 1.54E-03 | CG8318-RB  | FBan0016269 | 43149  | 722.02  | 480.14  |
| 1624405_s_at | CG7059  | ---                               | down | 1.50 | 5.10E-03 | CG7059-RA  | FBan0038957 | 42926  | 975.44  | 451.47  |
| 1623424_a_at | babo    | Activin A receptor 45A            | down | 1.50 | 1.26E-02 | CG8224-RB  | FBan0011300 | 35900  | 633.00  | 421.25  |
| 1637626_at   | CG15412 | ---                               | down | 1.50 | 1.94E-02 | CG15412-RA | FBan0031528 | 33553  | 214.97  | 143.09  |
| 1625153_at   | lefl4   | lefl4                             | down | 1.50 | 2.95E-02 | CG15003-RA | FBan0032504 | 38501  | 145.92  | 99.15   |
| 1625873_at   | CG15661 | ---                               | down | 1.50 | 2.44E-02 | CG15661-RA | FBan0034606 | 37421  | 781.37  | 520.35  |
| 1635714_s_at | fdl     | fused lobes                       | down | 1.50 | 8.20E-03 | CG8824-RC  | FBan0045063 | 250735 | 988.48  | 665.48  |
