# Supplementary material for: TDP-43 prevents retrotransposon activation in the Drosophila motor system through regulation of Dicer-2 activity
Source: PubMed Central journal article supplement (PMC7334854; doi:10.1186/s12915-020-00816-1), 2020-07-03
Supplement: 12915_2020_816_MOESM2_ESM.pdf [file 12915_2020_816_MOESM2_ESM.pdf]

Customer name: Fabien Feiglin  
 Project name: W1118 vs. Delta 142  
 Chip: Affymetrix Frayfish Genomex Genome 2.0 Array  
 Organism: Drosophila  
 Analysis level: Gene

Data Overview: Regulated probesets

|                               | Up-regulated | Down-regulated | All     |
|-------------------------------|--------------|----------------|---------|
| Number of regulated probesets | 150          | 150            | 1408    |
| Min fold-change               | 1.50         | 1.50           |         |
| Average fold-change           | 3.12         | 5.51           | 4.19    |
| Median of fold-change         | 1.97         | 2.00           | 3.05    |
| Max fold-change               | 378.25       | 609.05         | 609.05  |
| Gene with the max fold-change | CG10178      | CG16713        | CG16713 |

List of the 1408 Regulated Probesets (Fold-change ≥ 1.5; P-Value ≤ 0,05)

| Affymetrix Probeset ID | Gene Symbol                     | Gene Name                       | Regulation | Fold-Change | P-Value  | Representative Public ID | FlyBase ID                       | Entrez Gene ID (NCBI)    | Intensity Data 142 | Intensity W1118 |
|------------------------|---------------------------------|---------------------------------|------------|-------------|----------|--------------------------|----------------------------------|--------------------------|--------------------|-----------------|
| 1628950_s_at           | CG10178                         | TEK1N C                         | up         | 378.25      | 1.96E-02 | CG10178-RA               | FBan003284                       | 35105                    | 3.92               | 1483.30         |
| 1629238_s_at           | Yps6a17                         | Cyp6a17                         | up         | 44.05       | 1.24E-04 | CG10641-RA               | FBan003638                       | 38653                    | 21.84              | 1180.34         |
| 1629052_s_at           | CG40485                         | ---                             | up         | 48.93       | 1.62E-04 | CG10241-RA               | FBan001574                       | 45566                    | 17.08              | 1323.83         |
| 1639944_s_at           | CG9486                          | ---                             | up         | 34.84       | 1.65E-02 | CG40485-RB               | CG40485-RB                       | 3355165                  | 23.06              | 4599.29         |
| 1639728_s_at           | ph                              | ph                              | up         | 25.97       | 1.46E-03 | CG12958-RA               | FBan003052                       | 33974                    | 12.67              | 327.77          |
| 1627096_s_at           | CG16778                         | BTB-protein-III                 | up         | 16.58       | 2.00E-03 | CG12958-RA               | FBan003052                       | 33974                    | 41.27              | 691.90          |
| 1626774_s_at           | robo                            | Roundabout 1                    | up         | 15.03       | 1.64E-03 | CG13521-RA               | FBan0005631                      | 37603                    | 55.14              | 828.95          |
| 1638338_s_at           | Fbp1                            | Protein-1                       | up         | 14.50       | 2.23E-02 | CG12958-RA               | FBan003052                       | 33974                    | 25.01              | 355.11          |
| 1635512_s_at           | CG11893                         | ---                             | up         | 13.22       | 4.98E-04 | CG11893-RA               | CG11893-RA                       | 43506                    | 62.31              | 823.82          |
| 1631639_s_at           | Tpmc470                         | troponin C                      | up         | 12.76       | 4.73E-02 | CG9073-RA                | FBan0010423                      | 36195                    | 14.67              | 1607.93         |
| 1640448_s_at           | ---                             | ---                             | up         | 10.87       | 7.93E-05 | Transposon 39            | ---                              | ---                      | 42.43              | 452.44          |
| 1632856_s_at           | Vmat                            | Vesicular monoamine transporter | up         | 10.91       | 2.06E-04 | CG13912-RA               | FBan0029064                      | 3346192                  | 81.61              | 939.89          |
| 1627324_s_at           | lola                            | longitudinals lacking           | up         | 8.99        | 1.83E-05 | CG12052-RH               | FBan0005630                      | 44548                    | 40.47              | 363.89          |
| 1635312_s_at           | ---                             | ---                             | up         | 8.73        | 9.15E-03 | SQ39817                  | ---                              | ---                      | 11.80              | 103.91          |
| 1627841_s_at           | CG11170                         | ---                             | up         | 8.56        | 2.01E-05 | CG11170-RB               | FBan0034706                      | 37533                    | 39.20              | 335.36          |
| 1635594_s_at           | CG5285                          | ---                             | up         | 8.32        | 1.57E-03 | CG5285-RA                | CG5285-RA                        | 42073                    | 5.69               | 47.30           |
| 1623410_s_at           | Pxd                             | Peroxidase                      | up         | 7.70        | 2.12E-02 | CG11695                  | CG11695                          | 2789071                  | 407.23             | 3135.03         |
| 1631311_s_at           | ---                             | ---                             | up         | 7.08        | 1.06E-03 | CG14381-RA               | ---                              | ---                      | 12.91              | 91.45           |
| 1629479_s_at           | fkf                             | Medging of Klp38B               | up         | 6.99        | 2.69E-03 | CG10746-RB               | FBan0020303                      | 44380                    | 1025.21            | 1764.52         |
| 1637650_s_at           | CG4299                          | CG14343                         | up         | 6.87        | 7.78E-03 | CG51822-RA               | CG51822-RA                       | 33312                    | 37.22              | 248.33          |
| 1633780_s_at           | CG13793                         | ---                             | up         | 6.66        | 7.40E-03 | CG13793-RA               | FBan0031936                      | 34047                    | 15.77              | 105.05          |
| 1623250_s_at           | GstE1                           | glutathione-S-transferase       | up         | 6.59        | 6.18E-05 | CG5164-RA                | FBan0034335                      | 37106                    | 96.42              | 6366.75         |
| 1638959_s_at           | Cpr51A                          | ---                             | up         | 6.52        | 7.65E-04 | CG10112-RA               | FBan0031942                      | 34047                    | 105.78             | 690.04          |
| 1624864_s_at           | dock                            | dreaddocks                      | up         | 6.29        | 1.28E-03 | CG3727-RA                | FBan0010583                      | 33362                    | 186.86             | 1169.38         |
| 1630085_s_at           | Pentrophin-A                    | pentrophin A                    | up         | 6.03        | 1.68E-03 | CG17058-RA               | FBan0022770                      | 33023                    | 268.90             | 1621.16         |
| 1632045_s_at           | CG6867                          | ---                             | up         | 5.92        | 2.69E-02 | CG26997-RA               | FBan0038848                      | 42443                    | 123.33             | 459.69          |
| 1637558_s_at           | YBPH                            | YBPH                            | up         | 5.81        | 3.60E-04 | CG10327-RD               | FBan0025790                      | 37781                    | 148.08             | 848.92          |
| 1633481_s_at           | CG14394                         | Ninjurin C                      | up         | 5.59        | 3.07E-02 | CG14394-RA               | FBan0030776                      | 41568                    | 234.08             | 1307.46         |
| 1635408_s_at           | Cpr19                           | ---                             | up         | 5.50        | 1.73E-04 | CG15003-RA               | FBan0030926                      | 34047                    | 583.29             | 362.50          |
| 1641317_s_at           | sau                             | Squash                          | up         | 5.45        | 1.34E-03 | HDC02844                 | FBan0002852                      | 2789202                  | 16.20              | 88.30           |
| 1630927_x_at           | Pxd                             | Peroxidase                      | up         | 5.44        | 3.10E-02 | CG11695                  | FBan0004577                      | 2789071                  | 327.57             | 1783.04         |
| 1623372_s_at           | CG5873                          | ---                             | up         | 5.31        | 1.81E-02 | CG5873-RA                | FBan0003571                      | 42660                    | 140.91             | 747.80          |
| 1629817_s_at           | dros                            | drosomycin-F                    | up         | 5.07        | 2.11E-04 | CG32842-RA               | FBan002282                       | 311754                   | 22.81              | 1178.86         |
| 163010_a_at            | pnt                             | pointed                         | up         | 5.03        | 6.21E-03 | CG17077-RB               | FBan0003118                      | 42757                    | 26.28              | 142.30          |
| 1630405_s_at           | CheA7c                          | CheA7c                          | up         | 5.02        | 2.74E-05 | CG15037-RA               | FBan0030776                      | 41568                    | 22.51              | 1151.88         |
| 1639772_s_at           | CG16107                         | ---                             | up         | 4.94        | 5.70E-04 | CG18107-RA               | FBan0034334                      | 37101                    | 305.16             | 14978.95        |
| 1639225_s_at           | CG13711                         | ---                             | up         | 4.79        | 6.13E-03 | CG13711-RA               | FBan003572                       | 38576                    | 7.91               | 37.87           |
| 1623435_s_at           | CG9905                          | ---                             | up         | 4.73        | 3.42E-02 | CG9905-RA                | FBan0031805                      | 33889                    | 120.30             | 129.13          |
| 1629884_s_at           | CG15029                         | ---                             | up         | 4.67        | 2.32E-02 | CG15029-RA               | FBan0030926                      | 34047                    | 23.25              | 582.69          |
| 1640853_s_at           | CG15020                         | ---                             | up         | 4.72        | 1.31E-02 | CG15020-RA               | FBan0035543                      | 38544                    | 14.23              | 67.16           |
| 1637562_s_at           | Iwgf1                           | GCR(ich)                        | up         | 4.72        | 1.45E-03 | CG5818-RA                | FBan0029170                      | 44790                    | 200.45             | 945.57          |
| 1639434_s_at           | Cpr9R                           | ---                             | up         | 4.69        | 3.91E-02 | CG12044-RA               | FBan0030776                      | 41568                    | 436.33             | 239.42          |
| 1639734_s_at           | CG4017                          | ---                             | up         | 4.64        | 2.71E-02 | CG4017-RA                | FBan0032143                      | 34296                    | 22.40              | 104.83          |
| 1638956_s_at           | CG2650                          | 0.9kb transcript                | up         | 4.62        | 4.49E-02 | CG2650-RA                | FBan0003092                      | 31252                    | 152.59             | 70.22           |
| 1629717_s_at           | CG15551                         | ---                             | up         | 4.57        | 4.68E-02 | CG15551-RA               | FBan0031863                      | 40143                    | 201.43             | 115.87          |
| 1637900_s_at           | CG11852                         | ---                             | up         | 4.51        | 3.12E-02 | CG11852-RA               | FBan0030927                      | 43035                    | 1101.04            | 4963.80         |
| 1632527_s_at           | CG13705                         | ---                             | up         | 4.45        | 2.08E-03 | CG13705-RA               | FBan0035292                      | 38567                    | 187.20             | 841.74          |
| 1625433_s_at           | Scp1                            | calcium binding protein         | up         | 4.47        | 2.04E-02 | CG11864-RA               | FBan0030926                      | 34047                    | 333.02             | 4692.37         |
| 1630649_s_at           | CG12520                         | ---                             | up         | 4.40        | 2.06E-02 | CG12520-RA               | FBan0036324                      | 39466                    | 17.65              | 77.67           |
| 1623834_s_at           | CG18641                         | ---                             | up         | 4.35        | 2.46E-03 | CG18641-RA               | FBan0031426                      | 33429                    | 10.49              | 119.54          |
| 1631777_s_at           | CG13892                         | ---                             | up         | 4.32        | 1.48E-02 | CG13892-RA               | FBan0031942                      | 34047                    | 139.86             | 49.65           |
| 1640681_s_at           | CG4950                          | ---                             | up         | 4.26        | 1.73E-02 | CG4950-RA                | FBan0035587                      | 39783                    | 177.65             | 756.51          |
| 1635258_s_at           | ---                             | ---                             | up         | 4.26        | 8.28E-03 | Transposon 46            | ---                              | ---                      | 723.91             | 3083.20         |
| 1631432_s_at           | CG42748                         | ---                             | up         | 4.21        | 2.28E-02 | CG15786-RA               | FBan0031803                      | 38576                    | 68.00              | 288.80          |
| 1637123_s_at           | CG33281                         | ---                             | up         | 4.19        | 5.40E-03 | CG15407-RB               | FBan0035281                      | 2789338                  | 37.51              | 157.23          |
| 1627801_s_at           | CG997                           | ---                             | up         | 4.19        | 1.99E-04 | CG997-RA                 | FBan0031801                      | 33854                    | 21.94              | 892.34          |
| 1631628_s_at           | CG12896 // Prx25a0 // Prx25a0-2 | AOP2-related // peroxidoxin 25  | up         | 4.18        | 9.45E-02 | CG12896-RA               | CG12896-RA                       | 246663 // 36098 // 36101 | 363.25             | 16173.93        |
| 1634745_s_at           | CG18885                         | ---                             | up         | 4.12        | 9.40E-03 | CG18885-RA               | FBan0032533                      | 34811                    | 67.16              | 2769.32         |
| 1634209_s_at           | pim                             | pimples                         | up         | 4.10        | 2.04E-02 | CG5052-RA                | FBan0030387                      | 34404                    | 20.65              | 84.57           |
| 1627896_s_at           | Hust1-like                      | Hust1-like                      | up         | 4.05        | 2.06E-02 | CG10296-RA               | FBan0030926                      | 34047                    | 47.58              | 202.53          |
| 1640617_s_at           | CG10208                         | ---                             | up         | 4.03        | 1.38E-06 | CG10208-RA               | FBan0031118                      | 42814                    | 314.04             | 1270.42         |
| 1628830_s_at           | CG6044 // Lop1                  | ---                             | up         | 4.04        | 9.30E-03 | CG11650-RA               | 0002531 // FBan00035817 // 37558 | 42.55                    | 171.71             |                 |
| 1628891_s_at           | CG15414                         | ---                             | up         | 4.01        | 2.13E-02 | CG15414-RA               | FBan0031863                      | 40143                    | 420.94             | 1656.59         |
| 1633907_s_at           | CG14770 // DmCG14770            | ---                             | up         | 4.00        | 3.25E-02 | CG14770-RA               | 002674 // FBan0026100            | 333.02                   | 385.27             | 1656.59         |
| 1633120_s_at           | ---                             | ---                             | up         | 3.96        | 1.52E-02 | HDC06051                 | ---                              | ---                      | 15.88              | 62.09           |
| 1624195_s_at           | sup                             | superbabe                       | up         | 3.95        | 3.01E-02 | CG3850-RA                | FBan0031382                      | 36424                    | 203.96             | 805.70          |
| 1639314_s_at           | Opr19b                          | Oprant-binding protein 19b      | up         | 3.94        | 3.25E-04 | CG19170-RA               | FBan0031110                      | 33038                    | 129.38             | 592.33          |
| 1639098_s_at           | CG2837                          | ---                             | up         | 3.94        | 4.49E-04 | CG2837-RB                | FBan0031646                      | 33696                    | 129.03             | 507.83          |
| 1639902_s_at           | CG15029                         | ventrally-expressed-protein-D   | up         | 3.91        | 9.33E-05 | CG33000-RA               | FBan0036200                      | 411331                   | 116.57             | 463.72          |
| 1637650_s_at           | CG5150                          | ventrally-expressed-protein-D   | up         | 3.90        | 1.73E-02 | CG5150-RA                | CG5150-RA                        | 39633                    | 10.48              | 49.69           |
| 1624982_s_at           | CG5080                          | ---                             | up         | 3.91        | 1.57E-02 | CG5080-RB                | FBan0031313                      | 33299                    | 1474.00            | 5742.13         |
| 1627693_s_at           | CG34296                         | ---                             | up         | 3.89        | 2.74E-02 | HDC16265                 | FBan0038325                      | 574062                   | 9.72               | 37.77           |
| 1630559_s_at           | Rpg2                            | Rpg2                            | up         | 3.88        | 1.50E-04 | CG15004-RA               | FBan0035510                      | 38068                    | 309.40             | 1195.25         |
| 1632860_s_at           | Cpr4Aa                          | CG15006                         | up         | 3.86        | 2.24E-04 | CG15006-RA               | CG15006-RA                       | 33040                    | 531.17             | 200.80          |
| 1637366_s_at           | nimC                            | CG16876                         | up         | 3.85        | 1.47E-05 | CG16876-RA               | FBan0026011                      | 34824                    | 163.39             | 629.80          |
| 1629252_s_at           | CG11688                         | ---                             | up         | 3.82        | 2.28E-02 | CG11688-RA               | FBan0031942                      | 34047                    | 115.25             | 492.37          |
| 1624891_s_at           | CG13183 // DmCG13183            | ---                             | up         | 3.80        | 8.21E-05 | CG13183-RA               | 0033667 // FBan0026100           | 36275                    | 269.25             | 1023.40         |
| 1630171_s_at           | Cpr9Ea                          | CG6131                          | up         | 3.75        | 2.59E-02 | CG6131-RA                | FBan0034850                      | 43228                    | 1974.19            | 7409.45         |
| 1640900_s_at           | Arc42                           | ---                             | up         | 3.71        | 1.03E-02 | CG17032-RA               | FBan0031942                      | 34047                    | 101.91             | 459.69          |
| 1630105_s_at           | CG32850                         | ---                             | up         | 3.71        | 1.50E-02 | Transposon 97            | ---                              | ---                      | 181246             | 7951.61         |
| 16394123_s_at          | CG14304                         | ---                             | up         | 3.71        | 3.95E-02 | CG14304-RA               | FBan0038629                      | 42232                    | 116.72             | 429.02          |
| 1631432_s_at           | CG11437                         | ---                             | up         | 3.70        | 1.08E-03 | CG11437-RA               | FBan0031942                      | 34047                    | 471.05             | 177.05          |
| 1626882_s_at           | lush                            | lush                            | up         | 3.70        | 1.26E-02 | CG8807-RA                | FBan0020277                      | 40036                    | 125.80             | 494.89          |
| 1625061_s_at           | CG17298                         | ---                             | up         | 3.68        | 1.19E-02 | CG17298-RA               | FBan0038879                      | 42529                    | 928.63             | 3416.24         |
| 1641125_s_at           | CG11942                         | ---                             | up         | 3.67        | 1.68E-03 | CG11942-RA               | FBan0031110                      | 33038                    | 167.19             | 582.33          |
| 1624211_s_at           | CG9905                          | ---                             | up         | 3.64        | 3.04E-03 | CG9905-RA                | FBan0031638                      | 36243                    | 843.97             | 3075.81         |
| 1632870_s_at           | CG32364                         | ---                             |            |             |          |                          |                                  |                          |                    |                 |

|         |                                 |                                    |    |      |          |                |                    |                   |         |          |
|---------|---------------------------------|------------------------------------|----|------|----------|----------------|--------------------|-------------------|---------|----------|
| 1635161 | ---                             | ---                                | up | 2.71 | 2.88E-02 | CG7532-RA      | ---                | ---               | 3256.81 | 8934.70  |
| 1637816 | CG11A                           | CG2560                             | up | 2.71 | 1.63E-03 | CG2560-RA      | FBar0020394        | 321308            | 101.59  | 201.20   |
| 1632568 | CG3223                          | ---                                | up | 2.70 | 2.44E-02 | CG3223-RA      | FBar0037538        | 49047             | 757.10  | 2046.55  |
| 1637293 | CG17707                         | ---                                | up | 2.69 | 1.19E-02 | CG17707-RA     | FBar0025835        | 40740             | 236.05  | 635.80   |
| 1637246 | CG32627                         | ---                                | up | 2.69 | 6.45E-03 | CG32627-RA     | FBar0052621        | 43239             | 1786.51 | 4837.30  |
| 1641740 | CG34370                         | CG13499                            | up | 2.69 | 1.75E-02 | CG34370-RA     | FBar0040434        | 53045             | 256.89  | 256.89   |
| 1641365 | CG8745                          | ---                                | up | 2.68 | 5.12E-06 | CG8745-RA      | ---                | ---               | 138.47  | 371.83   |
| 1641270 | CG8745                          | ---                                | up | 2.67 | 3.35E-03 | CG8745-RA      | FBar0036381        | 36530             | 1229.76 | 3287.02  |
| 1637839 | Spn34A                          | Serine protease inhibitor 1        | up | 2.67 | 1.84E-02 | CG12172-RA     | FBar0014284        | 45041             | 214.84  | 63.54    |
| 1624399 | CG8630                          | ---                                | up | 2.66 | 6.82E-03 | CG8630-RA      | FBar0038130        | 41629             | 1688.81 | 4497.24  |
| 1639400 | CG13207                         | ---                                | up | 2.65 | 5.41E-03 | CG13207-RA     | FBar0026207        | 326126            | 1110.76 | 2847.00  |
| 162998  | Tipnl                           | tripetidyl peptidase II            | up | 2.65 | 2.65E-02 | CG33991-RA     | FBar0036960        | 24844             | 694.92  | 694.92   |
| 1631951 | CG11951                         | ---                                | up | 2.64 | 2.68E-02 | CG11951-RA     | FBar0031265        | 43663             | 183.67  | 484.76   |
| 1634619 | CG34217                         | ---                                | up | 2.64 | 6.21E-03 | CG34217-RA     | FBar0038246        | 5740254           | 1523.37 | 4017.15  |
| 162811  | mDp1.1b                         | mitochondrial ribosomal protein L  | up | 2.63 | 2.63E-04 | CG12313-RA     | FBar0031454        | 39416             | 722.16  | 722.16   |
| 1630577 | CG17378                         | ---                                | up | 2.63 | 6.98E-03 | CG17378-RA     | FBar0031858        | 33951             | 30.02   | 78.90    |
| 1633089 | klia                            | longitudinals lacking              | up | 2.63 | 6.99E-05 | CG12692-RJ     | FBar0020530        | 44548             | 47.69   | 125.26   |
| 1629716 | Thp-1                           | Proteasome 20S regulatory subunit  | up | 2.62 | 1.61E-02 | CG10310-RA     | FBar0028694        | 42913             | 395.67  | 7997.98  |
| 1628351 | Rpn11                           | ycippe interacting protein 5       | up | 2.62 | 3.55E-02 | CG18174-RA     | ---                | ---               | 3785.87 | 9905.27  |
| 1629530 | IM23                            | Immune induced molecule 23         | up | 2.62 | 1.51E-02 | CG15096-RA     | FBar0034328        | 37059             | 7354.76 | 19240.46 |
| 1634820 | Prose20                         | Proteasome 20S alpha3 subunit      | up | 2.61 | 3.74E-02 | CG19027-RA     | FBar0291394        | 31213             | 233.62  | 6183.44  |
| 1637313 | CG1440 // Dm1GD16898            | ---                                | up | 2.61 | 4.61E-02 | CG1440-RA      | 0030038 // FBar000 | 31776             | 1104.14 | 2880.82  |
| 1636338 | CG18021                         | ---                                | up | 2.61 | 4.58E-03 | CG18021-RA     | FBar0035544        | 38548             | 977.17  | 2548.21  |
| 1628185 | CG18978                         | ---                                | up | 2.59 | 9.29E-04 | CG18978-RA     | FBar0040072        | 35646             | 281.35  | 744.81   |
| 1629893 | scb                             | volado                             | up | 2.59 | 8.70E-04 | CG8095-RB      | FBar0003328        | 36952             | 490.91  | 1270.31  |
| 1640107 | obsA                            | CG17052                            | up | 2.58 | 4.68E-05 | CG17052-RA     | FBar0031097        | 33022             | 1325.39 | 3420.22  |
| 1628481 | Tex                             | CG10310-RA                         | up | 2.58 | 1.63E-03 | CG2560-RA      | FBar0020394        | 321308            | 101.59  | 201.20   |
| 1628696 | CG12643                         | ---                                | up | 2.57 | 3.12E-03 | CG12643-RA     | FBar0040942        | 50416             | 1789.36 | 4545.16  |
| 1629226 | CG13349                         | ---                                | up | 2.57 | 4.68E-02 | CG13349-RA     | FBar0033886        | 36545             | 2339.05 | 6005.54  |
| 1631050 | CG5384                          | ---                                | up | 2.57 | 4.81E-02 | CG5384-RA      | FBar0032218        | 34587             | 364.92  | 1010.94  |
| 1629641 | ---                             | ---                                | up | 2.56 | 1.53E-02 | Transposon 65  | ---                | ---               | 86.63   | 221.23   |
| 1629772 | CG3770                          | ---                                | up | 2.54 | 7.51E-03 | CG3770-RA      | FBar0035035        | 37971             | 137.94  | 350.44   |
| 1629604 | CG16024 // Pdn                  | --- // pigment cell hydroxylase    | up | 2.53 | 7.30E-02 | CG16024-RA     | 0011693 // FBar000 | 38612 // 50172    | 286.33  | 715.36   |
| 1628843 | lpo2                            | Interaction partner of Dm1c2       | up | 2.53 | 1.49E-03 | CG2961-RA      | FBar0031181        | 31954             | 44.69   | 113.23   |
| 1632026 | CG9934                          | ---                                | up | 2.53 | 3.42E-02 | CG9934-RA      | FBar0032467        | 34939             | 2186.23 | 5461.66  |
| 1637349 | Rpn1                            | Rpn1                               | up | 2.53 | 2.35E-02 | CG1762-RA      | FBar0026996        | 40174             | 1807.34 | 4573.34  |
| 1641393 | ckc1                            | cracked                            | up | 2.53 | 7.93E-04 | CG14693-RA     | FBar0031404        | 39412             | 384.26  | 1001.69  |
| 1639217 | brat                            | Brain Tumor                        | up | 2.52 | 4.46E-02 | CG10719-RA     | FBar0010300        | 35197             | 59.19   | 148.91   |
| 163592  | CREG                            | cellular repressor of E1A-stimulat | up | 2.51 | 8.90E-03 | CG5413-RB      | FBar0024596        | 42002             | 194.57  | 4899.33  |
| 1639812 | CG5655                          | ---                                | up | 2.51 | 2.34E-03 | CG5655-RA      | FBar0033696        | 42302             | 731.92  | 1931.62  |
| 1640389 | Obp56c                          | Odorant-binding protein 56c        | up | 2.50 | 2.24E-02 | CG30128-RA     | FBar0048879        | 17082             | 223.55  | 58.21    |
| 1639472 | Corb2b                          | CG13935                            | up | 2.50 | 2.25E-02 | CG13935-RA     | FBar0033280        | 38240             | 2240.39 | 5691.94  |
| 1629191 | CG31109                         | ---                                | up | 2.49 | 3.84E-02 | CG31109-RA     | CG31109-RA         | 34315             | 34.39   | 86.11    |
| 1635259 | Mov34                           | Mov34                              | up | 2.49 | 3.56E-02 | CG3416-RA      | FBar0002787        | 37894             | 2331.35 | 5800.95  |
| 1624445 | CG6396                          | ---                                | up | 2.48 | 6.23E-03 | CG6396-RA      | FBar0031728        | 28293             | 365.41  | 902.94   |
| 1631240 | CG12713                         | ---                                | up | 2.48 | 7.28E-02 | CG12713-RA     | FBar0031536        | 41924             | 147.24  | 418.17   |
| 1629638 | conv                            | convoluted                         | up | 2.48 | 1.78E-02 | CG8561-RA      | FBar0261269        | 36588             | 207.60  | 514.68   |
| 1624035 | verm                            | helmsman                           | up | 2.48 | 1.75E-02 | CG8756-RB      | FBar0261341        | 40149             | 1705.40 | 4222.15  |
| 1623001 | CG33963                         | ---                                | up | 2.47 | 9.91E-03 | CG33963-RA     | FBar0033263        | 42634             | 167.82  | 425.82   |
| 1628261 | CG13067                         | ---                                | up | 2.46 | 1.14E-02 | CG13067-RA     | FBar0035589        | 39765             | 1739.11 | 4280.55  |
| 1633994 | Rpn7                            | Rpn7                               | up | 2.46 | 3.80E-02 | CG5378-RA      | FBar0028688        | 42641             | 2101.19 | 5162.18  |
| 1629458 | mln                             | mln                                | up | 2.45 | 2.23E-03 | CG13778-RC     | FBar0031780        | 34523             | 345.53  | 845.54   |
| 1633950 | CG8323                          | ---                                | up | 2.45 | 7.10E-03 | CG8323-RA      | FBar0033803        | 36568             | 287.01  | 704.43   |
| 1638853 | Gpr47E                          | CG13214                            | up | 2.44 | 2.13E-02 | CG13214-RA     | FBar0033603        | 36184             | 336.13  | 820.84   |
| 1628584 | CG30561                         | Cyp305a1                           | up | 2.44 | 1.01E-03 | CG30561-RA     | FBar0033980        | 40581             | 369.09  | 835.07   |
| 1637077 | CG3777                          | ---                                | up | 2.44 | 4.22E-03 | CG3777-RA      | FBar0024899        | 30979             | 782.90  | 1908.84  |
| 1640391 | CG12802                         | ---                                | up | 2.43 | 8.21E-03 | CG34969-RA     | FBar0260818        | 41217             | 73.16   | 177.84   |
| 1637421 | Ch12                            | CG34969                            | up | 2.43 | 1.78E-02 | CG34969-RA     | FBar0260818        | 41217             | 73.16   | 177.84   |
| 1632328 | serp                            | Serpentine                         | up | 2.43 | 2.31E-02 | CG32209-RB     | FBar0260583        | 40150             | 3021.51 | 7327.76  |
| 1639636 | Ch7                             | CG1869                             | up | 2.42 | 4.61E-03 | CG1869-RA      | FBar0033368        | 38370             | 1029.24 | 2432.32  |
| 1634013 | Gpr76b                          | CG6298                             | up | 2.42 | 3.10E-02 | CG6298-RB      | FBar0033989        | 40466             | 164.80  | 416.31   |
| 1634405 | Dip3                            | Dipeptidase B                      | up | 2.42 | 8.96E-03 | CG32082-RA     | FBar0035082        | 41430             | 179.83  | 3992.11  |
| 1629773 | CG32082                         | ---                                | up | 2.42 | 3.97E-03 | CG32082-RA     | FBar0035082        | 41430             | 83.43   | 201.73   |
| 1638616 | mln9                            | Mln-like 9                         | up | 2.42 | 2.26E-02 | CG17084-RA     | FBar0033131        | 38068             | 91.26   | 220.99   |
| 1640121 | CG8049                          | ---                                | up | 2.41 | 1.15E-02 | CG8049-RA      | FBar0034044        | 38412             | 141.26  | 354.41   |
| 1632278 | CG8049                          | ---                                | up | 2.41 | 2.88E-02 | CG80193-RA     | ---                | ---               | 208.46  | 503.33   |
| 1633716 | CG5355                          | ---                                | up | 2.41 | 1.93E-03 | CG5355-RA      | FBar0032442        | 34421             | 669.66  | 1616.72  |
| 1629698 | CG5325                          | Peroxisomal farnesylated protein   | up | 2.41 | 3.42E-03 | CG5325-RA      | FBar0033969        | 41630             | 199.52  | 502.82   |
| 1640462 | Ho                              | Heme oxygenase                     | up | 2.41 | 1.46E-02 | CG14716-RA     | FBar0037933        | 44450             | 5879.04 | 14137.44 |
| 1633939 | CG13563                         | ---                                | up | 2.40 | 3.67E-03 | CG13563-RA     | FBar0034968        | 37845             | 148.27  | 356.18   |
| 1629731 | CG14566                         | ---                                | up | 2.39 | 3.17E-02 | CG14566-RA     | FBar0031129        | 34292             | 70.29   | 176.11   |
| 1632883 | copaGIP                         | gag-int-pol                        | up | 2.38 | 3.18E-05 | Transposon 117 | FBar0011437        | ---               | 1201.23 | 2805.91  |
| 1639460 | CG17218                         | ---                                | up | 2.38 | 2.26E-03 | CG17218-RA     | FBar0032421        | 34648             | 505.08  | 1201.72  |
| 1627855 | yellow-e                        | yellow-e                           | up | 2.37 | 7.18E-05 | CG9792-RA      | FBar0041711        | 41683             | 908.23  | 2149.11  |
| 1634226 | CG17249                         | ---                                | up | 2.36 | 5.79E-03 | CG17249-RA     | FBar0033240        | 38201             | 63.96   | 150.70   |
| 1639221 | ut                              | SPI1070                            | up | 2.35 | 9.38E-04 | CG13818-RA     | FBar0031874        | 33963             | 174.80  | 521.62   |
| 1628712 | CG17754                         | ---                                | up | 2.35 | 2.90E-04 | CG17754-RC     | FBar0030314        | 31873             | 3317.59 | 7807.36  |
| 1637161 | myoglianin                      | Myoglianin                         | up | 2.35 | 6.11E-03 | CG1838-RA      | FBar0026199        | 43811             | 41.21   | 96.90    |
| 1641055 | Hsp23                           | Protein 23                         | up | 2.35 | 1.78E-02 | CG44651-RA     | FBar0031523        | 38377             | 893.07  | 2235.54  |
| 1625584 | CG8654                          | ---                                | up | 2.35 | 3.08E-03 | CG8654-RA      | FBar0034479        | 37275             | 1073.02 | 2566.03  |
| 1639057 | CG15445                         | ---                                | up | 2.34 | 1.48E-02 | CG15445-RA     | FBar0031161        | 33094             | 1290.09 | 3024.99  |
| 1633289 | CG6435                          | ---                                | up | 2.34 | 1.58E-02 | CG12488-RA     | FBar0031665        | 36894             | 1170.28 | 2936.54  |
| 1635573 | ---                             | ---                                | up | 2.34 | 1.58E-02 | CG12488-RA     | ---                | ---               | 65.20   | 152.40   |
| 1639934 | CG31272                         | ---                                | up | 2.34 | 1.35E-03 | CG31272-RA     | FBar0031272        | 326130            | 36.24   | 84.86    |
| 1637460 | CG13314                         | ---                                | up | 2.34 | 1.07E-02 | CG13314-RA     | FBar0031446        | 38134             | 113.44  | 283.26   |
| 1633887 | 13851 // DmnaUG13851 // Dm1cG13 | ---                                | up | 2.33 | 2.45E-02 | CG13851-RA     | /// FBar0260196    | 42627             | 46.81   | 109.17   |
| 1638610 | CG7802                          | ---                                | up | 2.33 | 3.44E-02 | CG7802-RA      | FBar0030704        | 43523             | 47.23   | 114.10   |
| 1630334 | CG13338                         | CG13338                            | up | 2.33 | 1.01E-02 | CG13338-RA     | FBar0033367        | 41892             | 28.93   | 67.36    |
| 1630707 | CG10096 // CG10097              | ---                                | up | 2.33 | 4.04E-02 | CG32919-RA     | 0030338 // FBar000 | 371758 // 3772183 | 35.06   | 81.82    |
| 1640358 | CG4968                          | ---                                | up | 2.33 | 1.81E-02 | CG4968-RA      | FBar0032214        | 34384             | 929.62  | 2160.71  |
| 1634019 | CG10064                         | ---                                | up | 2.33 | 3.85E-03 | CG10064-RA     | FBar0033068        | 38708             | 2119.97 | 5171.97  |
| 1636311 | Spch                            | 9 gene                             | up | 2.32 | 1.74E-02 | CG80412-RA     | FBar0031124        | 35504             | 55.04   | 1263.46  |
| 1637341 | Rpt3                            | Rpt3                               | up | 2.32 | 4.21E-02 | CG18916-RA     | FBar0028886        | 32047             | 3025.43 | 7620.34  |
| 1629326 | CG13436                         | ---                                | up | 2.32 | 2.69E-03 | CG13436-RA     | FBar0031436        | 31874             | 384.43  | 892.46   |
| 1629498 | Rpn3                            | Nobody                             | up | 2.32 | 3.14E-02 | CG10293-RA     | FBar0024292        | 42902             | 387.43  | 949.27   |
| 1635636 | to                              | Takeout                            | up | 2.32 | 2.47E-02 | CG11853-RA     | FBar0032938        | 43036             | 201.76  | 467.81   |
| 1638884 | CG4236                          | ---                                | up | 2.31 | 1.29E-02 | CG4236-RA      | FBar0031384        | 33377             | 84.57   | 195.67   |
| 1629101 | CG14046                         | ---                                | up | 2.31 | 2.14E-02 | CG14046-RA     | FBar0033403        | 42627             | 90.07   | 940.27   |
| 1628555 | Osi19                           | Osis                               | up | 2.31 | 2.42E-02 | CG15189-RA     | FBar0032499        | 40776             | 51.11   | 118.03   |
| 1636313 | lgs3                            | DNA ligase III                     | up | 2.31 | 4.55E-04 | CG17227-RA     | FBar0033025        | 41518             | 306.80  | 707.98   |
| 1633321 | yellow-h                        | yellow-h                           | up | 2.31 | 2.91E-02 | CG16289-RA     | FBar0031689        | 44372             | 146.10  | 366.10   |
| 1623740 | CG32154                         | ---                                | up | 2.30 | 3.55E-03 | CG32154-RA     | FBar0032154        | 39778             | 200.32  | 502.92   |
| 1629398 | CG5853                          | ---                                | up | 2.30 | 2.64E-03 | CG5853-RA      | FBar0032167        | 34322             | 738.72  | 1700.52  |
| 1640145 | CG11074                         | ---                                |    |      |          |                |                    |                   |         |          |

|                     |    |                      |                                      |    |      |          |                |                        |                   |      |     |      |    |
|---------------------|----|----------------------|--------------------------------------|----|------|----------|----------------|------------------------|-------------------|------|-----|------|----|
| 1628859             | at | sh                   | Dynamitin                            | up | 2.06 | 4.24E-03 | CG18102-RC     | FBar0003392            | 45928             | 1407 | 49  | 2904 | 02 |
| 1628860             | at | CG18088              | ---                                  | up | 2.06 | 2.91E-03 | CG18088-RB     | FBar0003391            | 4737              | 281  | 31  | 262  | 03 |
| 1628863             | at | e                    | ebony                                | up | 2.06 | 2.19E-02 | CG3331-RA      | FBar0000527            | 42521             | 1173 | 85  | 2414 | 67 |
| 1640877             | at | Tgt                  | RNA-guanine transglycosylase         | up | 2.05 | 2.07E-02 | CG4947-RA      | FBar0003121            | 33307             | 38   | 41  | 78   | 92 |
| 1628112             | at | Hsp27                | heat shock protein hsp27             | up | 2.05 | 3.30E-03 | CG4466-RA      | FBar0001226            | 38078             | 164  | 99  | 339  | 60 |
| 1628966             | at | CG13935              | ---                                  | up | 2.05 | 8.13E-03 | CG13935-RB     | FBar0001565            | 39150             | 138  | 150 | 225  | 67 |
| 1633846             | at | CG31955              | ---                                  | up | 2.05 | 4.97E-03 | CG31955-RB     | FBar0001268            | 331045            | 246  | 81  | 505  | 59 |
| AFFX-z-Disc-GAPDH-3 | at | ---                  | ---                                  | up | 2.05 | 1.79E-02 | AFFX-Dm-Gpoh-3 | ---                    | ---               | 7232 | 36  | 1460 | 01 |
| 1633681             | at | CG3119               | ---                                  | up | 2.05 | 6.81E-03 | CG3119-RA      | FBar0001466            | 33479             | 187  | 105 | 351  | 63 |
| 1640637             | at | MED19                | Mediator complex subunit 19          | up | 2.04 | 5.61E-03 | CG5546-RA      | FBar0003761            | 45987             | 437  | 307 | 884  | 99 |
| 1637471             | at | CG30291 // grau      | --- // grauzone                      | up | 2.04 | 4.23E-03 | CG30291-RA     | B001133 // FBar0002465 | 34534 // 45657    | 207  | 84  | 423  | 30 |
| 1629525             | at | ksa                  | keratin-like protein                 | up | 2.04 | 3.04E-03 | CG12532-RC     | FBar0001232            | 34545             | 12   | 13  | 25   | 10 |
| 1638876             | at | Rpn2                 | Ribosomal protein L23                | up | 2.04 | 8.96E-03 | CG11888-RB     | FBar0002862            | 43449             | 428  | 47  | 870  | 31 |
| 1637445             | at | nipple2              | nipple2                              | up | 2.04 | 2.57E-02 | CG18321-RA     | FBar0002902            | 44767             | 702  | 07  | 1429 | 91 |
| 1647474             | at | td                   | ---                                  | up | 2.03 | 3.64E-02 | CG11026-RA     | FBar0001489            | 31124             | 24   | 10  | 43   | 62 |
| 1634125             | at | CG30440              | ---                                  | up | 2.03 | 5.01E-03 | CG30440-RA     | FBar0000440            | 35496             | 170  | 66  | 346  | 94 |
| 1616608             | at | Gpoh                 | S gene                               | up | 2.03 | 2.22E-02 | CG9042-RB      | FBar0001128            | 33824             | 7193 | 97  | 1422 | 93 |
| 1633405             | at | CG37838              | ---                                  | up | 2.03 | 6.83E-03 | CG37838-RA     | FBar0003133            | 39220             | 427  | 88  | 561  | 75 |
| 1636118             | at | CG13065              | ---                                  | up | 2.03 | 3.76E-02 | CG13065-RA     | FBar0003590            | 39786             | 579  | 92  | 1174 | 66 |
| 1638861             | at | CG31648              | Complex IV assembly protein COI      | up | 2.03 | 1.73E-03 | CG31648-RA     | FBar00051849           | 33776             | 187  | 85  | 380  | 47 |
| 1638922             | at | CG12123 // DmCG12123 | ---                                  | up | 2.03 | 0.81E-03 | CG12123-RA     | B000399 // FBar0002465 | 11777             | 241  | 14  | 436  | 44 |
| 1639466             | at | CG30101              | ---                                  | up | 2.02 | 4.96E-02 | CG30101-RA     | FBar00050111           | 36950             | 187  | 36  | 379  | 04 |
| 1629277             | at | CG9128               | ---                                  | up | 2.02 | 6.88E-03 | CG9128-RA      | FBar0003068            | 32504             | 1283 | 19  | 2594 | 04 |
| 1634703             | at | Gta1                 | Glutamine fructose-6-phosphate       | up | 2.02 | 9.22E-03 | CG12123-RA     | B000399 // FBar0002465 | 11777             | 241  | 14  | 436  | 44 |
| 1636168             | at | CG13101              | ---                                  | up | 2.02 | 2.68E-02 | CG13101-RA     | FBar00032084           | 34221             | 204  | 97  | 413  | 22 |
| 1635072             | at | CG7214               | ---                                  | up | 2.01 | 1.19E-02 | CG7214-RA      | FBar00031940           | 34053             | 7507 | 59  | 1528 | 56 |
| 1633405             | at | CG42869              | ---                                  | up | 2.01 | 5.43E-04 | CG42869-RB     | FBar0003929            | 42438             | 427  | 88  | 561  | 75 |
| 1628613             | at | CG30492 // CG30494   | --- // ---                           | up | 2.01 | 9.97E-04 | CG30492-RE     | B002760 // FBar0002465 | 35699 // 35699    | 539  | 70  | 1085 | 01 |
| 1636154             | at | CG30090              | ---                                  | up | 2.00 | 1.81E-02 | CG30090-RA     | FBar0003090            | 248448            | 32   | 03  | 64   | 13 |
| 1629840             | at | CG11619              | ---                                  | up | 2.00 | 1.00E-02 | CG11619-RA     | FBar0003438            | 42037             | 120  | 13  | 263  | 03 |
| 1637545             | at | prp                  | pre-processor                        | up | 2.00 | 1.69E-02 | CG1837-RA      | FBar0003329            | 32124             | 183  | 33  | 367  | 29 |
| 1638050             | at | Sox14                | Sox box protein 14                   | up | 2.00 | 4.81E-02 | CG3090-RA      | FBar0002672            | 37822             | 800  | 69  | 1759 | 70 |
| 1628486             | at | CG6873               | ---                                  | up | 2.00 | 9.22E-03 | CG12440-RA     | FBar0001241            | 334001            | 1567 | 103 | 3165 | 69 |
| 1641042             | at | CG18820              | ---                                  | up | 2.00 | 5.30E-04 | CG18820-RA     | FBar00032495           | 34730             | 507  | 64  | 1012 | 89 |
| 1631954             | at | Ranbp9               | Ranbp9                               | up | 1.99 | 2.14E-03 | CG5252-RA      | FBar00037894           | 41367             | 208  | 27  | 415  | 37 |
| 1638234             | at | bond                 | James bond                           | up | 1.99 | 1.71E-03 | CG6921-RB      | FBar0026942            | 42657             | 181  | 48  | 362  | 03 |
| 1624328             | at | scp1                 | Scp1                                 | up | 1.99 | 3.97E-01 | CG14035-RA     | FBar0003114            | 33114             | 158  | 30  | 161  | 23 |
| 1628466             | at | Rpn6                 | Proteasome p4.5 subunit              | up | 1.99 | 9.24E-03 | CG10149-RA     | FBar0002889            | 36538             | 56   | 10  | 1165 | 93 |
| 1632543             | at | CG39003              | ---                                  | up | 1.99 | 1.31E-02 | CG39003-RA     | FBar0003369            | 36244             | 528  | 46  | 1049 | 83 |
| 1627095             | at | Cyp4a1               | Cyp4a1                               | up | 1.99 | 1.56E-02 | CG39045-RA     | FBar0003405            | 36732             | 96   | 33  | 157  | 49 |
| 1631660             | at | CG12942              | ---                                  | up | 1.99 | 7.64E-03 | CG12942-RA     | FBar0003359            | 38138             | 80   | 14  | 159  | 12 |
| 1633384             | at | Mp66                 | M-phase phosphoprotein 6             | up | 1.99 | 3.87E-02 | CG9250-RA      | FBar0003221            | 33332             | 201  | 42  | 578  | 55 |
| 1632961             | at | Rai1                 | Rai1                                 | up | 1.99 | 8.37E-04 | CG10354-RB     | CG10354-RB             | 33954             | 142  | 64  | 239  | 67 |
| 1634701             | at | CG3713               | ---                                  | up | 1.98 | 2.13E-02 | CG3713-RA      | FBar00040343           | 50365             | 67   | 74  | 134  | 86 |
| 1625729             | at | tup                  | tset                                 | up | 1.98 | 3.70E-02 | CG10619-RA     | FBar0003386            | 35147             | 76   | 97  | 152  | 03 |
| 1637521             | at | CG11887              | ---                                  | up | 1.98 | 4.73E-02 | CG11887-RA     | FBar0003529            | 42438             | 427  | 88  | 561  | 75 |
| 1632021             | at | CG11321              | ---                                  | up | 1.97 | 1.05E-02 | CG11321-RA     | FBar00031857           | 33660             | 75   | 97  | 152  | 03 |
| 1632775             | at | CG42254              | CR30478                              | up | 1.97 | 3.67E-02 | CG12854-RA     | FBar00259112           | 39544             | 23   | 47  | 144  | 92 |
| 1628662             | at | CG11531              | ---                                  | up | 1.97 | 1.04E-03 | CG11531-RB     | FBar00031188           | 32137             | 486  | 39  | 864  | 13 |
| 1633303             | at | Ch6                  | CG2989                               | up | 1.97 | 1.87E-02 | CG40188-RA     | FBar00031171           | 33542             | 140  | 75  | 368  | 27 |
| 1634162             | at | CG40188              | ---                                  | up | 1.97 | 4.16E-03 | CG40188-RA     | FBar00031171           | 33542             | 1832 | 36  | 868  | 27 |
| 1629715             | at | CG7891               | ---                                  | up | 1.97 | 8.37E-04 | CG7891-RA      | FBar00031054           | 33785             | 742  | 73  | 1459 | 73 |
| 1625600             | at | Asph                 | Asparly beta-hydroxylase             | up | 1.96 | 2.07E-02 | CG8421-RE      | FBar00034076           | 38778             | 72   | 96  | 143  | 21 |
| 1640580             | at | CG6185               | ---                                  | up | 1.96 | 4.96E-02 | CG6185-RA      | FBar00031470           | 39269             | 117  | 40  | 97   | 53 |
| 1629559             | at | Abat                 | ABC transporter expressed in trachea | up | 1.96 | 4.71E-04 | CG28895-RA     | FBar0003289            | 42438             | 138  | 30  | 283  | 20 |
| 1641041             | at | CG18467              | ---                                  | up | 1.96 | 3.73E-03 | CG18467-RA     | FBar00034128           | 39598             | 58   | 12  | 114  | 28 |
| 1631387             | at | CG30344              | ---                                  | up | 1.96 | 2.32E-02 | CG30344-RA     | FBar0003044            | 24958             | 133  | 29  | 263  | 52 |
| 1631001             | at | casp                 | casper                               | up | 1.96 | 2.85E-03 | CG84005-RB     | FBar0003408            | 35044             | 104  | 14  | 284  | 14 |
| 1640365             | at | fusi                 | CG14021                              | up | 1.95 | 1.43E-02 | CG14021-RB     | FBar00031702           | 33755             | 45   | 10  | 87   | 88 |
| 1638950             | at | SupI                 | Suppressor of reI(P) sterility       | up | 1.95 | 7.36E-04 | CG4088-RA      | FBar0004485            | 37862             | 606  | 96  | 1185 | 13 |
| 1632432             | at | CG6865               | Oligomeric metalloprotease           | up | 1.95 | 3.84E-04 | CG6865-RA      | FBar0003406            | 37742             | 685  | 33  | 1619 | 19 |
| 1628008             | at | TER94                | ter94                                | up | 1.95 | 2.08E-02 | CG231-RA       | FBar00281014           | 39040             | 5538 | 70  | 1032 | 14 |
| 1624074             | at | Odp56a               | Odorant-binding protein 56a          | up | 1.95 | 3.24E-02 | CG11797-RA     | FBar00034468           | 37264             | 57   | 47  | 111  | 94 |
| 1630005             | at | Ubr-p5E              | Ubrutin-5E                           | up | 1.94 | 5.78E-04 | CG3744-RA      | FBar0008958            | 326237            | 884  | 80  | 1301 | 30 |
| 1632861             | at | Ost12                | Ost12                                | up | 1.94 | 3.97E-03 | CG11549-RA     | FBar0003405            | 36732             | 96   | 33  | 157  | 49 |
| 1638842             | at | CG8460               | ---                                  | up | 1.94 | 3.80E-02 | CG8460-RA      | FBar00031996           | 34115             | 153  | 63  | 297  | 27 |
| 1628381             | at | CG9400               | ---                                  | up | 1.93 | 1.83E-03 | CG9400-RA      | FBar0003562            | 42385             | 2389 | 70  | 4638 | 58 |
| AFFX-z-Disc-GAPDH-5 | at | ---                  | ---                                  | up | 1.93 | 1.20E-02 | AFFX-Dm-Gpoh-5 | ---                    | ---               | 747  | 31  | 477  | 58 |
| 1639621             | at | CG10916              | ---                                  | up | 1.93 | 1.20E-02 | CG10916-RA     | FBar00034312           | 37081             | 365  | 26  | 704  | 56 |
| 1636028             | at | CG11714 // Fuca      | --- // alpha-L-fucosidase            | up | 1.93 | 1.44E-02 | CG33047-RA     | B003169 // FBar0002465 | 377256 // 3772574 | 153  | 51  | 296  | 03 |
| 1639933             | at | tw                   | ---                                  | up | 1.93 | 1.44E-02 | CG33047-RA     | B003169 // FBar0002465 | 377256 // 3772574 | 153  | 51  | 296  | 03 |
| 1628190             | at | CG33981 // fab1      | BEST.GH01256 // Ptdins3JP-5-k        | up | 1.92 | 3.45E-02 | CG3355-RA      | O028741 // FBar0002465 | 37033 // 3885654  | 45   | 85  | 88   | 14 |
| 1628993             | at | Gasp                 | Gasp                                 | up | 1.92 | 6.89E-03 | CG10297-RA     | FBar0002077            | 40745             | 8532 | 38  | 1639 | 06 |
| 1639724             | at | CG18507              | ---                                  | up | 1.92 | 2.13E-02 | CG18507-RA     | FBar00031857           | 33660             | 75   | 97  | 152  | 03 |
| 1641039             | at | rv                   | retroactive                          | up | 1.92 | 1.74E-03 | CG1397-RA      | FBar00021277           | 32056             | 142  | 57  | 273  | 58 |
| 1628997             | at | CalpB                | Calpain B                            | up | 1.92 | 2.17E-04 | CG8107-RA      | FBar0002386            | 39105             | 2059 | 08  | 3948 | 98 |
| 1641101             | at | MED20                | Mediator complex subunit 20          | up | 1.92 | 1.53E-02 | CG18763-RA     | FBar0003153            | 41393             | 48   | 53  | 107  | 67 |
| 1636797             | at | Aals-ser             | Seryl-RNA synthetase                 | up | 1.92 | 3.23E-03 | CG6493-RA      | FBar00021750           | 41862             | 179  | 15  | 342  | 96 |
| 1632965             | at | Bn1                  | Sm3A-associated polypeptide p18      | up | 1.91 | 6.76E-03 | CG6046-RA      | FBar0002441            | 41965             | 464  | 13  | 888  | 28 |
| 1638718             | at | CG4462               | ---                                  | up | 1.91 | 1.73E-05 | CG4462-RB      | FBar0003408            | 37862             | 606  | 96  | 1185 | 13 |
| 1623666             | at | CG10516              | ---                                  | up | 1.91 | 1.45E-02 | CG10516-RA     | FBar00034549           | 39738             | 609  | 77  | 1164 | 99 |
| 1629794             | at | ihog                 | Interference Hedgehog                | up | 1.91 | 1.96E-02 | CG9211-RA      | FBar00031872           | 33972             | 114  | 86  | 219  | 43 |
| AFFX-z-Disc-GAPDH-3 | at | ---                  | ---                                  | up | 1.91 | 1.96E-02 | AFFX-Dm-Gpoh-3 | ---                    | ---               | 747  | 31  | 477  | 58 |
| 1635196             | at | CG5836               | ---                                  | up | 1.91 | 2.84E-04 | CG5836-RA      | FBar0003834            | 40070             | 38   | 78  | 737  | 83 |
| 1629494             | at | Gpoh                 | S gene                               | up | 1.91 | 1.20E-02 | CG9042-RB      | FBar0001128            | 33824             | 7193 | 97  | 1422 | 93 |
| 1638348             | at | CG6865               | Oligomeric metalloprotease           | up | 1.91 | 3.84E-04 | CG6865-RA      | FBar0003406            | 37742             | 685  | 33  | 1619 | 19 |
| 1638365             | at | CG3244               | ---                                  | up | 1.90 | 2.48E-03 | CG3244-RA      | FBar00031629           | 33678             | 505  | 18  | 9616 | 81 |
| 1632896             | at | CG33978              | ---                                  | up | 1.90 | 2.17E-02 | HDC16973       | FBar0003878            | 3885646           | 427  | 29  | 812  | 60 |
| 1641598             | at | CG31006              | ---                                  | up | 1.90 | 5.89E-03 | CG10055-RA     | FBar00051008           | 41367             | 208  | 27  | 415  | 37 |
| 1631768             | at | qkE5E-1              | KH-domain                            | up | 1.90 | 4.13E-02 | CG3813-RA      | FBar0003286            | 37561             | 147  | 13  | 191  | 68 |
| 1635883             | at | CG6136               | ---                                  | up | 1.90 | 4.96E-03 | CG6136-RA      | FBar0003632            | 41877             | 62   | 36  | 118  | 22 |
| 1640480             | at | CG18522 // DmCG18522 | ---                                  | up | 1.89 | 4.96E-03 | CG1            |                        |                   |      |     |      |    |

|            |                                                                       |                                       |    |      |          |               |                     |                   |          |          |
|------------|-----------------------------------------------------------------------|---------------------------------------|----|------|----------|---------------|---------------------|-------------------|----------|----------|
| 1640386_at | wb                                                                    | windbeutel                            | up | 1.74 | 9.81E-03 | CG7225-RA     | FbAn0040003         | 37206             | 102.03   | 177.50   |
| 1641698_at | CG18136                                                               | ---                                   | up | 1.74 | 1.81E-02 | CG18136-RA    | FbAn0039929         | 140075            | 14.93    | 23.68    |
| 1633888_at | CG12567                                                               | ---                                   | up | 1.74 | 5.88E-03 | CG12567-RB    | FbAn0039958         | 335504            | 629.29   | 1092.25  |
| 1623238_at | CG5618                                                                | ---                                   | up | 1.73 | 6.10E-03 | CG5618-RA     | FbAn0038976         | 40241             | 2532.81  | 4394.26  |
| 1624995_at | CG15629                                                               | ---                                   | up | 1.73 | 3.21E-02 | CG15629-RA    | FbAn0041630         | 33679             | 965.98   | 981.61   |
| 1640339_at | CG42238                                                               | ---                                   | up | 1.73 | 3.91E-02 | CG42238-RA    | CG8996-RA           | ---               | 433.39   | 544.11   |
| 1631874_at | ---                                                                   | CG31090                               | up | 1.73 | 2.18E-02 | CG40295-RA    | ---                 | ---               | 133.71   | 231.82   |
| 1636991_at | f                                                                     | Neurojointed                          | up | 1.73 | 1.35E-02 | CG10917-RA    | FbAn0006580         | 37069             | 158.08   | 274.01   |
| 1641109_at | obs-B                                                                 | CG4775                                | up | 1.73 | 3.89E-02 | CG4775-RA     | FbAn0047630         | 24336             | 167.30   | 1076.99  |
| 1628059_at | bor                                                                   | belphégor                             | up | 1.73 | 4.10E-03 | CG6815-RA     | FbAn0041237         | 33365             | 579.13   | 1003.57  |
| 1627365_at | Cd85                                                                  | CG31973                               | up | 1.73 | 2.86E-02 | CG31973-RA    | FbAn0001973         | 33158             | 1674.07  | 2900.49  |
| 1641691_at | no                                                                    | Nes2c-like caspase                    | up | 1.73 | 1.03E-04 | CG8929-RA     | CG8929-RA           | 39173             | 22.25    | 46.24    |
| 1635006_at | /// DmncG7077 /// DmncG7077 /// DmncG7077 /// DmncG7077 /// DmncG7077 | ---                                   | up | 1.73 | 5.79E-03 | CG7077-RA     | 0086919 /// FbAn008 | 42614             | 244.65   | 4234.51  |
| 1627399_at | CG17286                                                               | ---                                   | up | 1.73 | 3.47E-02 | CG17286-RA    | FbAn0033089         | 33571             | 55.13    | 95.36    |
| 1631419_at | CG15313                                                               | ---                                   | up | 1.73 | 4.46E-03 | CG15313-RA    | FbAn0031923         | 31137             | 317.97   | 332.93   |
| 1634669_at | ice                                                                   | ice                                   | up | 1.73 | 2.23E-03 | CG7788-RA     | FbAn0018972         | 43511             | 1083.76  | 1873.39  |
| 1634606_at | mmv                                                                   | cabrio                                | up | 1.73 | 3.26E-04 | CG9536-RA     | FbAn0257442         | 43903             | 1530.37  | 2644.40  |
| 1641423_at | CG8739                                                                | ---                                   | up | 1.73 | 7.45E-02 | CG8739-RA     | FbAn0031926         | 34037             | 707.61   | 1093.63  |
| 1631330_at | CG3408                                                                | ---                                   | up | 1.72 | 2.01E-02 | CG3408-RA     | FbAn0038008         | 38107             | 122.81   | 211.33   |
| 1631273_at | CG5262                                                                | ---                                   | up | 1.72 | 9.05E-03 | CG5262-RA     | FbAn0039988         | 40258             | 394.90   | 680.43   |
| 1626743_at | CG32138                                                               | ---                                   | up | 1.72 | 5.60E-03 | CG32138-RB    | FbAn0051138         | 35651             | 222.26   | 384.63   |
| 1636151_at | CG32196                                                               | ---                                   | up | 1.72 | 7.86E-03 | CG32196-RA    | FbAn0052196         | 317908            | 182.74   | 313.65   |
| 1632082_at | Cyp64                                                                 | Cyp64                                 | up | 1.72 | 2.88E-03 | CG12800-RA    | FbAn0039006         | 42682             | 166.59   | 285.92   |
| 1634923_at | CG15094                                                               | ---                                   | up | 1.72 | 1.24E-03 | CG15094-RA    | FbAn0034359         | 37158             | 346.64   | 594.17   |
| 1640280_at | loia                                                                  | longitudinals lacking                 | up | 1.71 | 9.26E-03 | CG12052-RC    | FbAn0005630         | 44548             | 709.71   | 1216.31  |
| 1634742_at | Soth-2                                                                | Sorbitol dehydrogenase-2              | up | 1.71 | 4.11E-03 | CG4649-RA     | FbAn0023359         | 41313             | 461.57   | 790.37   |
| 1639296_at | Cbase                                                                 | Ceramidase                            | up | 1.71 | 7.45E-05 | CG1471-RB     | FbAn0039774         | 43618             | 707.61   | 1211.67  |
| 1638943_at | CG10947                                                               | ---                                   | up | 1.71 | 2.42E-02 | CG10947-RA    | FbAn0032857         | 39309             | 81.59    | 139.68   |
| 1630419_at | CG7300                                                                | ---                                   | up | 1.71 | 4.61E-02 | CG7300-RB     | FbAn0032286         | 34472             | 637.93   | 1090.62  |
| 1640320_at | CG30381                                                               | ---                                   | up | 1.71 | 1.81E-02 | Dm X 1748E 01 | FbAn0030381         | 24076             | 57.03    | 97.03    |
| 1643488_at | CG30197                                                               | ---                                   | up | 1.71 | 1.88E-02 | CG30197-RA    | FbAn0051267         | 44513             | 13604.32 | 23217.16 |
| 1632776_at | CG5                                                                   | JUN activation domain-binding protein | up | 1.71 | 2.58E-02 | CG14884-RA    | FbAn0027053         | 42000             | 546.77   | 933.12   |
| 1641703_at | CG1147                                                                | ---                                   | up | 1.71 | 9.21E-03 | CG1147-RA     | CG1147-RA           | 31749             | 261.66   | 445.65   |
| 1632248_at | CG9452                                                                | ---                                   | up | 1.71 | 3.26E-02 | CG9452-RA     | FbAn0038877         | 40119             | 75.52    | 128.80   |
| 1629319_at | CG17104                                                               | ---                                   | up | 1.70 | 4.43E-02 | CG17104-RA    | FbAn0040496         | 34465             | 186.00   | 317.08   |
| 1634971_at | mod(mmg4)                                                             | Modifier6.7                           | up | 1.70 | 5.63E-02 | CG24971-RY    | FbAn0001281         | 48228             | 113.42   | 193.32   |
| 1627721_at | CG12680                                                               | ---                                   | up | 1.70 | 2.03E-02 | CG12680-RA    | CG12680-RA          | 40268             | 173.83   | 327.87   |
| 1639975_at | ---                                                                   | ---                                   | up | 1.70 | 1.26E-02 | RE54004       | ---                 | ---               | 103.88   | 1763.40  |
| 1640707_at | CG15772                                                               | ---                                   | up | 1.70 | 2.88E-02 | CG15772-RA    | FbAn0029199         | 31498             | 526.32   | 886.97   |
| 1637412_at | san                                                                   | responsible for dominant phenocyp     | up | 1.70 | 1.11E-03 | CG2907-RB     | CG2907-RB           | 40961             | 47.85    | 82.64    |
| 1639680_at | ---                                                                   | ---                                   | up | 1.70 | 4.48E-03 | HDC15078      | ---                 | ---               | 2115.34  | 3594.70  |
| 1634662_at | Cyp31a1                                                               | Cyp31a1                               | up | 1.70 | 6.13E-03 | CG3360-RA     | FbAn0036528         | 41759             | 5339.55  | 9067.99  |
| 1629223_at | CG8539 // DmncCG8539                                                  | ---                                   | up | 1.70 | 3.98E-03 | CG8539-RA     | 0035791 /// FbAn008 | 40842             | 49.82    | 694.99   |
| 1634165_at | CG11378                                                               | ---                                   | up | 1.70 | 3.51E-04 | CG11378-RA    | FbAn0040364         | 31060             | 1094.35  | 1857.36  |
| 1641579_at | mRps26                                                                | mitochondrial ribosomal protein S26   | up | 1.70 | 8.48E-03 | CG7354-RA     | FbAn0036774         | 40001             | 331.68   | 562.91   |
| 1639717_at | Cyp4c3                                                                | Cytochrome P450-c3                    | up | 1.69 | 7.43E-03 | CG14349-RA    | FbAn0047032         | 41963             | 103.91   | 374.64   |
| 1634434_at | CG14015                                                               | ---                                   | up | 1.69 | 3.56E-02 | CG14015-RA    | FbAn0031716         | 33780             | 298.89   | 504.01   |
| 1633290_at | mol                                                                   | numb-interacting protein              | up | 1.69 | 3.07E-02 | CG4484-RA     | FbAn0086711         | 34872             | 596.04   | 1003.27  |
| 1640110_at | CG8613                                                                | ---                                   | up | 1.69 | 2.01E-02 | CG8613-RA     | FbAn0034088         | 33620             | 236.01   | 386.63   |
| 1629511_at | CG5326                                                                | ---                                   | up | 1.68 | 1.41E-02 | CG5326-RA     | FbAn0038983         | 42655             | 1485.96  | 2501.44  |
| 1629604_at | CG14259                                                               | ---                                   | up | 1.68 | 8.29E-04 | CG14259-RA    | FbAn0039483         | 42651             | 2604.06  | 4377.04  |
| 1633923_at | Phox                                                                  | Prophorbolinsyn synthase              | up | 1.68 | 4.01E-03 | CG10335-RA    | FbAn0030342         | 37158             | 182.28   | 322.72   |
| 1634465_at | Gluc1alpha                                                            | indefinite                            | up | 1.68 | 4.57E-02 | CG7532-RB     | FbAn0024863         | 42350             | 182.20   | 305.45   |
| 1631883_at | CG9610                                                                | ---                                   | up | 1.68 | 2.46E-03 | CG9610-RA     | FbAn0035675         | 38663             | 297.81   | 449.27   |
| 1635431_at | Shp2                                                                  | SECIS-binding protein 2               | up | 1.68 | 2.29E-02 | CG7098-RA     | CG7098-RA           | 40736             | 173.60   | 317.60   |
| 1631637_at | Cpr                                                                   | P450 reductase                        | up | 1.68 | 4.25E-03 | CG11567-RA    | FbAn0031523         | 33883             | 2455.25  | 4113.49  |
| 1628536_at | CG11880                                                               | ---                                   | up | 1.68 | 2.16E-02 | CG11880-RA    | FbAn0039637         | 43440             | 1249.91  | 2093.69  |
| 1629583_at | CG8621                                                                | ---                                   | up | 1.68 | 1.81E-02 | CG8621-RA     | FbAn0030588         | 33814             | 145.82   | 232.82   |
| 1625421_at | CG30377                                                               | ---                                   | up | 1.67 | 3.48E-02 | CG30377-RA    | FbAn0050377         | 50252             | 83.51    | 139.70   |
| 1637773_at | balispat                                                              | balispat                              | up | 1.67 | 4.88E-02 | CG3971-RA     | FbAn0289380         | 38660             | 1668.08  | 2775.25  |
| 1639319_at | CG31189                                                               | ---                                   | up | 1.67 | 4.14E-02 | CG31189-RB    | FbAn0031486         | 33918             | 52.08    | 87.01    |
| 1623308_at | CG33784                                                               | ---                                   | up | 1.67 | 1.80E-02 | HDC19790      | FbAn0033784         | 372181            | 842.36   | 137.54   |
| 1630450_at | Thd1                                                                  | Thd1                                  | up | 1.67 | 1.77E-02 | HDC16707      | FbAn0026869         | 43796             | 131.24   | 219.05   |
| 1638975_at | CG13876                                                               | ---                                   | up | 1.67 | 1.65E-02 | CG13876-RA    | FbAn0038109         | 38031             | 104.32   | 174.04   |
| 1634460_at | CG15397                                                               | ---                                   | up | 1.67 | 8.01E-03 | CG15397-RA    | FbAn0039441         | 40386             | 193.87   | 388.68   |
| 1623505_at | Ubi-p5E                                                               | Ubiquitin-5E                          | up | 1.66 | 3.58E-02 | CG11700-RA    | FbAn0086558         | 326237            | 15660.45 | 26070.03 |
| 1623934_at | bp                                                                    | black peat                            | up | 1.66 | 4.26E-04 | CG5266-RA     | FbAn0038387         | 41937             | 468.11   | 828.89   |
| 1625581_at | Ube3b                                                                 | Juvenile hormone epoxide hydrolase    | up | 1.66 | 2.73E-03 | CG15109-RA    | FbAn0031904         | 33883             | 182.28   | 322.72   |
| 1630280_at | CG42353 // CG42354                                                    | ---                                   | up | 1.66 | 3.58E-02 | CG9216-RA     | 0256996 /// FbAn008 | 32576 /// 7354437 | 491.63   | 8169.82  |
| 1630831_at | CG7095                                                                | ---                                   | up | 1.66 | 3.22E-04 | CG7095-RA     | FbAn0038821         | 42234             | 971.56   | 1614.30  |
| 1629693_at | Invadysin                                                             | Invadysin                             | up | 1.66 | 3.10E-03 | CG10335-RA    | FbAn0030342         | 37158             | 182.28   | 322.72   |
| 1626708_at | Cbl                                                                   | Cbl                                   | up | 1.66 | 3.82E-03 | CG7037-RA     | FbAn0020224         | 38961             | 270.74   | 449.60   |
| 1624729_at | loia                                                                  | longitudinals lacking                 | up | 1.66 | 1.42E-02 | CG12052-RC    | FbAn0005630         | 44548             | 307.04   | 599.73   |
| 1639717_at | zfp                                                                   | zfp-containing FLWCH zinc-finger      | up | 1.66 | 7.43E-04 | CG14349-RA    | FbAn0047032         | 41963             | 103.91   | 374.64   |
| 1632105_at | cib                                                                   | ciboulot                              | up | 1.66 | 1.06E-02 | CG4944-RC     | FbAn0026084         | 31359             | 2081.29  | 3453.79  |
| 1639256_at | CG5676                                                                | ---                                   | up | 1.66 | 1.57E-04 | CG5676-RA     | FbAn0032200         | 34368             | 1790.34  | 2968.87  |
| 1640011_at | CG16833                                                               | ---                                   | up | 1.66 | 4.01E-02 | CG16833-RA    | FbAn0031470         | 31557             | 103.91   | 192.62   |
| 1625944_at | CG16838                                                               | ---                                   | up | 1.66 | 3.02E-02 | CG16838-RB    | FbAn0036574         | 39770             | 111.66   | 185.13   |
| 1633092_at | cup                                                                   | cup                                   | up | 1.66 | 2.02E-02 | CG11181-RA    | FbAn0003992         | 33634             | 874.90   | 1449.69  |
| 1637763_at | CG8298                                                                | ---                                   | up | 1.66 | 4.10E-02 | CG8298-RA     | FbAn0030342         | 37158             | 182.28   | 322.72   |
| 1639480_at | Cat                                                                   | catalase                              | up | 1.65 | 3.44E-02 | CG6871-RA     | FbAn0000261         | 40048             | 3710.56  | 6138.82  |
| 1637129_at | CG5                                                                   | Glutathione S transferase E3          | up | 1.65 | 2.44E-03 | CG17524-RA    | FbAn0083497         | 37108             | 1728.96  | 2860.41  |
| 1634321_at | CG2851                                                                | ---                                   | up | 1.65 | 1.19E-02 | CG2851-RC     | FbAn0032051         | 33883             | 2455.25  | 4113.49  |
| 1627245_at | If235b9                                                               | transcription unit B                  | up | 1.65 | 4.57E-02 | CG4180-RA     | FbAn0018972         | 43511             | 467.30   | 771.82   |
| 1627004_at | CG7832                                                                | ---                                   | up | 1.65 | 3.32E-03 | CG7832-RA     | FbAn0037071         | 40357             | 531.99   | 877.08   |
| 1625683_at | CG5112                                                                | ---                                   | up | 1.65 | 1.41E-02 | CG5112-RA     | FbAn0030342         | 37158             | 182.28   | 322.72   |
| 1624121_at | knk                                                                   | knickkopf                             | up | 1.65 | 2.40E-02 | CG8217-RA     | FbAn0031271         | 40357             | 430.82   | 709.21   |
| 1631474_at | Gpa-1                                                                 | mitochondrial GDP                     | up | 1.65 | 6.18E-03 | CG8296-RC     | FbAn0022160         | 47611             | 1735.55  | 2857.00  |
| 1635854_at | mRps32                                                                | mitochondrial ribosomal protein L3    | up | 1.65 | 1.33E-02 | CG12203-RA    | FbAn0039838         | 43686             | 318.10   | 517.50   |
| 1633981_at | Trp2                                                                  | Tetrahydropteride repeat protein 2    | up | 1.64 | 3.89E-03 | CG4984-RA     | FbAn0034984         | 34984             | 134.28   | 217.28   |
| 1637874_at | Lasp                                                                  | Lasp                                  | up | 1.64 | 1.85E-02 | CG3849-RA     | FbAn0036486         | 38964             | 284.89   | 467.58   |
| 1629620_at | CG1786                                                                | ---                                   | up | 1.64 | 2.08E-03 | CG1786-RA     | FbAn0032696         | 33160             | 1381.89  | 2138.19  |
| 1629154_at | pat                                                                   | papillote                             | up | 1.64 | 4.66E-04 | CG4617-RA     | FbAn0040871         | 42044             | 1304.88  | 2141.54  |
| 1637814_at | Jlfrac2                                                               | Jlfrac2                               | up | 1.64 | 4.60E-02 | CG1274-RA     | FbAn0040308         | 33577             | 125.55   | 205.53   |
| 1637036_at | purple                                                                | purple                                | up | 1.64 | 3.98E-02 | CG16784-RC    | FbAn0031341         | 42662             | 1746.36  | 1698.49  |
| 1639981_at | Sub-531a                                                              | Single stranded-binding protein c2    | up | 1.64 | 3.17E-03 | CG8396-RA     | FbAn0031629         | 40386             | 193.87   | 388.68   |
| 1637993_at | MED11                                                                 | Mediator complex subunit 11           | up | 1.64 | 3.98E-02 | CG6884-RA     | FbAn0038811         | 40042             | 254.17   | 415.92   |
| 1635376_at | CG9086                                                                | ---                                   | up | 1.64 | 5.79E-03 | CG9086-RA     | FbAn0033809         | 32687             | 227.63   | 372.23   |
| 1629331_at | CG37841                                                               | ---                                   | up | 1.64 | 3.02E-04 | CG7841-RA     | FbAn0031470         | 31557             | 103.91   | 192.62   |
| 1623396_at | CG13875                                                               | ---                                   | up | 1.63 | 4.13E-02 | CG13875-RA    | FbAn0031004         | 38024             | 211.33   | 345.16   |
| 1629693_at | sut1                                                                  | sugar transporter 1                   | up | 1.63 | 4.92E-02 | CG8714-RA     | FbAn0028983         | 38774             | 378.30   | 617.83   |
| 1629293_at | mod(mmg4)                                                             | Modifier6.7                           | up | 1.63 | 5.63E-02 | CG24971-RM    | FbAn0001281         |                   |          |          |

|            |                                            |                                                          |      |        |          |              |                        |                   |          |          |
|------------|--------------------------------------------|----------------------------------------------------------|------|--------|----------|--------------|------------------------|-------------------|----------|----------|
| 1624267_at | CG7182                                     | ---                                                      | up   | 1.57   | 1.16E-02 | CG7182-RA    | Fbano033878            | 38944             | 157.50   | 246.60   |
| 1637039_at | CG14687                                    | ---                                                      | up   | 1.51   | 3.95E-02 | CG14687-RA   | Fbano033879            | 31127             | 81.23    | 135.43   |
| 1641345_at | CG3808                                     | ---                                                      | up   | 1.57   | 3.63E-02 | CG3808-RA    | Fbano033838            | 40074             | 83.28    | 130.33   |
| 1641699_at | TXBP181-like                               | TXBP181-like                                             | up   | 1.56   | 3.74E-03 | CG2072-RA    | Fbano026326            | 39994             | 341.72   | 534.78   |
| 1645983_at | CG5909                                     | ---                                                      | up   | 1.56   | 3.28E-02 | CG5909-RA    | Fbano034496            | 43274             | 295.62   | 447.41   |
| 1622844_at | Sov2                                       | mitochondrial SOD                                        | up   | 1.56   | 1.88E-04 | CG8984-RA    | Fbano038813            | 38818             | 601.24   | 4556.81  |
| 1627693_at | CG1985                                     | ---                                                      | up   | 1.56   | 8.44E-04 | CG1985-RA    | Fbano037466            | 40842             | 486.47   | 759.08   |
| 1637936_at | CG32512                                    | ---                                                      | up   | 1.56   | 3.01E-02 | CG32512-RA   | Fbano025212            | 33363             | 175.51   | 273.80   |
| 1629161_at | Obozd9                                     | Odorant-binding protein 56f                              | up   | 1.56   | 4.44E-04 | CG30426-RA   | Fbano034633            | 246689            | 171.25   | 182.90   |
| 1633701_at | CG16985                                    | ---                                                      | up   | 1.56   | 2.51E-02 | CG16985-RA   | Fbano033356            | 38023             | 581.70   | 906.82   |
| 1627023_at | CG4884                                     | ---                                                      | up   | 1.56   | 2.67E-02 | CG4884-RA    | Fbano033965            | 43357             | 220.70   | 343.83   |
| 1627171_at | samo                                       | serrano                                                  | up   | 1.56   | 2.85E-02 | CG12734-RA   | Fbano038926            | 42444             | 193.37   | 143.67   |
| 1631620_at | GYP                                        | glycogen phosphatase b                                   | up   | 1.56   | 1.07E-02 | CG7254-RA    | Fbano004507            | 33386             | 729.16   | 11347.55 |
| 1628929_at | CG1902                                     | ---                                                      | up   | 1.56   | 7.40E-03 | CG1902-RA    | Fbano033434            | 33993             | 1376.52  | 2140.75  |
| 1627925_at | CG6315                                     | ---                                                      | up   | 1.55   | 6.31E-03 | CG6315-RA    | Fbano031454            | 35938             | 475.28   | 745.28   |
| 1633712_at | CG31997                                    | ---                                                      | up   | 1.55   | 1.33E-02 | CG31997-RA   | Fbano033947            | 31904             | 1376.52  | 8218.22  |
| 1632623_at | BtH1                                       | Bar-H1                                                   | up   | 1.55   | 2.47E-02 | CG5628-RA    | Fbano011758            | 32724             | 107.96   | 167.70   |
| 1637435_at | Atf4                                       | aromatase methyltransferase 4                            | up   | 1.55   | 2.04E-02 | CG5359-RA    | Fbano031770            | 33384             | 112.19   | 171.25   |
| 1631948_at | Cik                                        | cklock                                                   | up   | 1.55   | 1.22E-02 | CG7381-RA    | Fbano023076            | 38872             | 201.13   | 303.33   |
| 1628264_at | CG14889                                    | ---                                                      | up   | 1.55   | 7.90E-03 | CG14889-RA   | Fbano033841            | 41887             | 613.49   | 951.77   |
| 1633637_at | CG5412                                     | ---                                                      | up   | 1.55   | 2.50E-02 | CG5412-RA    | Fbano038926            | 42444             | 171.25   | 265.00   |
| 1634767_at | CG6126                                     | ---                                                      | up   | 1.55   | 9.31E-03 | CG6126-RA    | Fbano038407            | 41967             | 1407.84  | 2183.30  |
| 1634303_at | ---                                        | ---                                                      | up   | 1.55   | 3.37E-02 | CG11228-RA   | Fbano001235            | 42204             | 687.82   | 1065.88  |
| 1633456_at | CG31235                                    | ---                                                      | up   | 1.55   | 3.78E-02 | CG31235-RA   | Fbano001235            | 42204             | 687.82   | 1065.88  |
| 1629790_at | CG11267                                    | ---                                                      | up   | 1.55   | 1.52E-03 | CG11267-RA   | Fbano033334            | 38476             | 25.12    | 3887.71  |
| 1637076_at | CG9861                                     | ---                                                      | up   | 1.55   | 4.11E-03 | CG9861-RA    | Fbano037676            | 41109             | 1001.31  | 1547.44  |
| 1628335_at | dmt1                                       | ---                                                      | up   | 1.54   | 2.97E-03 | CG12489-RA   | Fbano028696            | 37574             | 600.89   | 925.72   |
| 1634243_at | CG9012                                     | defense repressor 1                                      | up   | 1.54   | 1.52E-02 | CG9012-RA    | Fbano003832            | 50305             | 805.70   | 1240.66  |
| 1626350_at | alpha-Est10                                | Esterase-10                                              | up   | 1.54   | 7.44E-04 | CG1131-RA    | Fbano015569            | 40806             | 246.97   | 379.92   |
| 1628071_at | ---                                        | ---                                                      | up   | 1.54   | 3.20E04  | CG2000437    | ---                    | ---               | 31.75    | 125.85   |
| 1628705_at | PHAlphaEFB                                 | proyl-4-hydroxylase-alpha EFB                            | up   | 1.54   | 8.77E-03 | CG31022-RA   | Fbano039776            | 43620             | 1508.16  | 234.29   |
| 1628760_at | CG2974                                     | ---                                                      | up   | 1.54   | 3.55E-02 | CG2974-RA    | Fbano033178            | 31944             | 202.69   | 311.39   |
| 1628668_at | CG3838                                     | ---                                                      | up   | 1.54   | 1.06E-02 | CG3838-RA    | Fbano033374            | 38374             | 263.27   | 404.64   |
| 1634101_at | CG6398                                     | ---                                                      | up   | 1.54   | 3.76E-02 | CG6398-RA    | Fbano033070            | 32761             | 1087.05  | 1638.79  |
| 1637638_at | CG10702                                    | ---                                                      | up   | 1.53   | 1.39E-02 | CG10702-RA   | Fbano032752            | 35181             | 496.89   | 762.46   |
| 1637628_at | Plc                                        | Plc-related Osp-like                                     | up   | 1.53   | 3.09E-02 | CG11212-RA   | Fbano033068            | 38546             | 303.87   | 465.89   |
| 1633907_at | CG5938                                     | ---                                                      | up   | 1.53   | 7.21E-03 | CG5938-RA    | Fbano038247            | 43239             | 193.87   | 292.69   |
| 1632762_at | CG32176 // CG32817                         | ---                                                      | up   | 1.53   | 4.10E-03 | CG32176-RA   | 0029524 // Fbano003090 | 30990 // 318226   | 249.49   | 381.73   |
| 1626033_at | Agp1                                       | Autophagy-specific gene 9                                | up   | 1.53   | 4.55E-02 | CG3615-RA    | Fbano023111            | 36821             | 621.31   | 949.72   |
| 1641035_at | /// DmrcCG5854 // DmrcCG5854 // DmrcCG5854 | ---                                                      | up   | 1.53   | 3.95E-03 | CG5854-RA    | 0089554 // Fbano008955 | 42931             | 171.25   | 143.67   |
| 1634746_at | CG3389                                     | ---                                                      | up   | 1.53   | 2.28E-02 | CG3389-RA    | Fbano033058            | 37966             | 413.23   | 630.99   |
| 1636272_at | CG10208                                    | ---                                                      | up   | 1.53   | 2.22E-02 | CG10208-RA   | Fbano033070            | 32761             | 1087.05  | 1638.79  |
| 1627375_at | CG30290                                    | ---                                                      | up   | 1.53   | 1.95E-03 | CG30290-RA   | 0050296 // Fbano005029 | 245329 // 8674001 | 1685.06  | 2572.08  |
| 1637469_at | pen-2                                      | presenilin enhancer                                      | up   | 1.52   | 1.01E-02 | CG31988-RA   | Fbano005198            | 251430            | 493.57   | 742.49   |
| 1629155_at | Kiarsicht                                  | Kiarsicht                                                | up   | 1.52   | 1.04E-02 | CG17046-RA   | Fbano003136            | 38067             | 114.01   | 1695.48  |
| 1641496_at | grass                                      | CG5896                                                   | up   | 1.52   | 1.62E-02 | CG5896-RA    | Fbano033409            | 41273             | 1132.10  | 1732.89  |
| 1638044_at | CG5902                                     | ---                                                      | up   | 1.52   | 3.72E-04 | CG5902-RA    | Fbano030136            | 42839             | 1005.17  | 1528.81  |
| 1634704_at | ATP7                                       | ATP7                                                     | up   | 1.52   | 3.61E-02 | CG1886-RA    | Fbano030343            | 32142             | 226.52   | 344.32   |
| 1629465_at | CG6051                                     | ---                                                      | up   | 1.52   | 3.81E-01 | CG6051-RA    | Fbano033402            | 41273             | 1132.10  | 1732.89  |
| 1626376_at | plp                                        | CG32133                                                  | up   | 1.52   | 4.11E-02 | CG32133-RA   | Fbano0052133           | 37552             | 58.15    | 88.20    |
| 1633894_at | Rfl1                                       | CG10955                                                  | up   | 1.52   | 3.27E-02 | CG10955-RA   | Fbano034722            | 39544             | 261.86   | 397.14   |
| 1630957_at | silf                                       | silmfest                                                 | up   | 1.52   | 3.82E-02 | CG11128-RA   | Fbano033070            | 32761             | 1087.05  | 1638.79  |
| 1627106_at | CG10237                                    | ---                                                      | up   | 1.52   | 2.69E-02 | CG10237-RA   | Fbano033783            | 38222             | 3570.22  | 5411.96  |
| 1623761_at | CG18347                                    | ---                                                      | up   | 1.52   | 3.24E-03 | CG18347-RA   | Fbano030040            | 31779             | 74.90    | 112.63   |
| 1637076_at | CG33892                                    | ---                                                      | up   | 1.52   | 3.29E-02 | CG33892-RA   | Fbano033929            | 43099             | 81.18    | 120.92   |
| 1641540_at | CG7668                                     | ---                                                      | up   | 1.51   | 8.26E-03 | CG7668-RA    | Fbano038929            | 40100             | 793.88   | 1202.02  |
| 1625461_at | Hsp90B // Ncc69D                           | Heat shock protein 90 related // s ventral veins lacking | up   | 1.51   | 1.61E-02 | CG4337-RA    | 0011244 // Fbano003910 | 39410 // 48572    | 829.02   | 1252.22  |
| 1628338_at | vt1                                        | ---                                                      | up   | 1.51   | 3.09E-02 | CG12489-RA   | Fbano028696            | 37574             | 600.89   | 925.72   |
| 1624692_at | CG6830                                     | ---                                                      | up   | 1.51   | 4.20E-03 | CG6830-RA    | Fbano037934            | 41408             | 283.13   | 430.53   |
| 1628646_at | CG4729                                     | ---                                                      | up   | 1.51   | 7.09E-04 | CG4729-RA    | Fbano033623            | 38820             | 204.95   | 308.36   |
| 1628795_at | CG9175                                     | ---                                                      | up   | 1.51   | 1.46E-02 | CG9175-RA    | Fbano033788            | 39286             | 189.92   | 283.60   |
| 1630218_at | Fin1                                       | CG10784                                                  | up   | 1.51   | 4.03E-02 | CG10784-RA   | Fbano017251            | 40509             | 138.05   | 205.22   |
| 1623481_at | MSBP                                       | CG90066                                                  | up   | 1.51   | 1.34E-02 | CG90066-RA   | Fbano030703            | 32548             | 1580.41  | 2380.50  |
| 1628665_at | mRpl39                                     | mitochondrial ribosomal protein L3                       | up   | 1.51   | 1.26E-02 | CG17166-RA   | Fbano034662            | 38627             | 515.95   | 777.08   |
| 1633200_at | As                                         | Drosophila Angelman syndrome                             | up   | 1.51   | 3.99E-04 | CG9180-RA    | Fbano031469            | 39761             | 193.87   | 292.69   |
| 1637567_at | flrs                                       | ---                                                      | up   | 1.51   | 3.03E-02 | CG10724-RA   | Fbano029049            | 39505             | 239.25   | 360.27   |
| 1638041_at | CG32225                                    | ---                                                      | up   | 1.51   | 3.77E-02 | CG32225-RA   | Fbano005225            | 317028            | 555.02   | 835.89   |
| 1630881_at | mb1                                        | ---                                                      | up   | 1.51   | 3.85E-02 | CG30881-RA   | Fbano033070            | 32761             | 1087.05  | 1638.79  |
| 1637039_at | tex                                        | Mind Bomb                                                | up   | 1.50   | 3.93E-02 | CG9615-RA    | Fbano037569            | 40963             | 82.99    | 124.84   |
| 1629935_at | CG7131                                     | ---                                                      | up   | 1.50   | 1.94E-02 | CG7131-RA    | Fbano033989            | 42117             | 59.81    | 89.96    |
| 1629396_at | CG34317 // CG37960                         | ---                                                      | up   | 1.50   | 1.95E-03 | CG34317-RA   | 0085246 // Fbano008524 | 43579 // 8742224  | 457.52   | 687.39   |
| 1634100_at | CG13855                                    | ---                                                      | up   | 1.50   | 7.29E-03 | CG13855-RA   | Fbano033968            | 42519             | 324.50   | 487.39   |
| 1629298_at | Arg5                                       | CG7940                                                   | up   | 1.50   | 2.13E-02 | CG7940-RA    | Fbano033876            | 42173             | 157.59   | 236.66   |
| 1631824_at | CG13824                                    | ---                                                      | up   | 1.50   | 2.92E-02 | CG13824-RA   | Fbano033409            | 41273             | 1132.10  | 1732.89  |
| 1628889_at | regucalcin                                 | regucalcin                                               | up   | 1.50   | 1.88E-02 | CG1803-RA    | Fbano030362            | 31765             | 261.95   | 391.09   |
| 1632699_at | Adh // Adhr                                | alcohol dehydrogenase // Adh-rel                         | up   | 1.50   | 2.09E-02 | CG32964-RA   | 000055 // Fbano000055  | 37187 // 3774232  | 290.05   | 375.16   |
| 1630081_at | 314291 // DmrcCG12983 // DmrcCG1141        | ---                                                      | up   | 1.50   | 3.12E-03 | CG14291-RA   | Fbano033070            | 32761             | 1087.05  | 1638.79  |
| 1634412_at | CG2135                                     | ---                                                      | up   | 1.50   | 3.38E-02 | CG2135-RA    | Fbano033874            | 43746             | 95.24    | 142.88   |
| 1624057_at | CG16713                                    | ---                                                      | down | 609.05 | 3.48E-03 | CG16713-RA   | Fbano031560            | 33511             | 6069.55  | 9.97     |
| 1633637_at | CG32188                                    | ---                                                      | down | 528.42 | 3.48E-03 | CG32188-RA   | Fbano033070            | 32761             | 1087.05  | 1638.79  |
| 1626088_at | CG2177                                     | ---                                                      | down | 132.10 | 6.75E-04 | CG2177-RA    | Fbano021777            | 43788             | 114.81   | 6.87     |
| 1633396_at | mRpl8                                      | Mth-like 8                                               | down | 106.03 | 7.20E-03 | CG137020     | Fbano029475            | 38013             | 351.09   | 3.31     |
| 1627151_at | Atk // AtkB                                | Atkin // atkin                                           | down | 92.93  | 6.92E-04 | CG12489-RA   | 0012483 // Fbano001248 | 36633 // 96537    | 303.87   | 388.88   |
| 1632919_at | Cacc                                       | Geopron                                                  | down | 57.10  | 4.43E-02 | CG1373-RA    | Fbano000279            | 13559             | 342.57   | 60.07    |
| 1629362_at | mRpl8                                      | Mth-like 8                                               | down | 56.94  | 2.60E-03 | CG32475-RA   | Fbano032475            | 38013             | 381.76   | 6.70     |
| 1632211_at | CG30091                                    | ---                                                      | down | 51.13  | 8.11E-03 | CG30091-RA   | Fbano033070            | 32761             | 1087.05  | 1638.79  |
| 1629565_at | Oa2                                        | Oasis                                                    | down | 34.69  | 1.74E-03 | CG1148-RA    | Fbano037410            | 40756             | 331.99   | 9.57     |
| 1629116_at | PGRP-SC2                                   | PGRP-SC2                                                 | down | 32.92  | 3.90E-02 | CG14745-RA   | Fbano034376            | 38862             | 4398.44  | 133.37   |
| 1637076_at | CG30096                                    | ---                                                      | down | 20.23  | 1.31E-02 | CG30096-RA   | Fbano030096            | 24646             | 766.84   | 253.37   |
| 1634633_at | ---                                        | ---                                                      | down | 19.57  | 1.30E-04 | Transposon54 | ---                    | ---               | 249.62   | ---      |
| 1629514_at | Ata                                        | atatin                                                   | down | 27.32  | 3.88E-02 | CG10146-RA   | Fbano012042            | 36636             | 7089.77  | 258.81   |
| 1631451_at | CG1688                                     | ---                                                      | down | 21.47  | 1.74E-02 | CG1688-RA    | Fbano033070            | 32761             | 1087.05  | 1638.79  |
| 1641414_at | Atc                                        | atatin                                                   | down | 21.30  | 2.24E-03 | CG44745-RA   | Fbano031276            | 34584             | 3244.41  | 1369.88  |
| 1631512_at | CG9377                                     | ---                                                      | down | 22.28  | 2.28E-03 | CG9377-RA    | Fbano033070            | 32761             | 1087.05  | 1638.79  |
| 1628526_at | Tef                                        | Turandot F                                               | down | 20.90  | 1.83E-02 | CG3169-RA    | Fbano004801            | 117461            | 1279.60  | 3.52     |
| 1629465_at | Lsp gamma                                  | Larval serum protein 1 gamma                             | down | 19.98  | 3.01E-03 | CG2821-RA    | Fbano032964            | 420115            | 280.15   | 423.80   |
| 1636887_at | CG40298                                    | ---                                                      | down | 17.54  | 2.19E-03 | CG40298-RA   | Fbano029828            | 335149            | 428.93   | 24.46    |
| 1634310_at | Tprc4                                      | Tprc4                                                    | down | 17.21  | 2.99E-03 | CG12408-RA   | Fbano033027            | 35498             | 231.42   | 134.45   |
| 1624916_at | ---                                        | ---                                                      | down | 15.94  | 1.04E-03 | Transposon17 | ---                    | ---               | 465.20   | ---      |
| 1638235_at | DpB                                        | dipiterian-like protein                                  | down | 14.24  | 3.10E-03 | CG10794-RA   | Fbano034407            | 37184             | 23551.01 | 1654.31  |
| 1633545_at | PGRP-SD                                    | PGRP-SD                                                  | down | 14.00  | 3.26E-02 | CG7496-RA    | Fbano033808            | 38858             | 497.253  | 355.13   |
| 1626517_at | Cec3                                       | Geopron B                                                | down | 13.02  | 1.03E-03 | CG19120-RA   | Fbano                  |                   |          |          |

|              |                        |                                      |      |      |          |                    |                    |                   |          |          |
|--------------|------------------------|--------------------------------------|------|------|----------|--------------------|--------------------|-------------------|----------|----------|
| 1639424_at   | CG5910                 | ---                                  | down | 3.67 | 1.81E-02 | CG6910-RA          | Fbgn030262         | 39391             | 1670.66  | 455.47   |
| 1623852_at   | CG10407                | ---                                  | down | 3.66 | 2.29E-02 | CG10407-RA         | Fbgn030398         | 12680             | 1291.43  | 330.93   |
| 1623770_at   | CG1673                 | ---                                  | down | 3.66 | 1.58E-02 | CG1673-RA          | Fbgn030482         | 32207             | 37.76    | 1021.13  |
| 1639374_s_at | Amyr4 // Amy-p         | Amylase // Amylase                   | down | 3.66 | 3.35E-02 | CG18730-RA         | 0000078 // Fbgn000 | 36932 // 47764    | 1461.98  | 399.17   |
| 1639328_s_at | CG5778                 | ---                                  | down | 3.66 | 3.00E-03 | CG5778-RA          | Fbgn030390         | 42988             | 1008.19  | 552.95   |
| 1631721_s_at | CG15433                | CG8789                               | down | 3.62 | 5.71E-04 | CG8789-RA          | Fbgn030463         | 40143             | 241.98   | 398.69   |
| 1631521_s_at | CG33469                | ---                                  | down | 3.62 | 8.09E-03 | CG33469-RA         | Fbgn030469         | 2789332           | 57.38    | 1.55     |
| 1627488_s_at | CG10433                | ---                                  | down | 3.61 | 2.92E-03 | CG10433-RA         | Fbgn030466         | 37458             | 87.55    | 242.61   |
| 1629884_at   | PGRP-SA                | semmelweis                           | down | 3.60 | 4.03E-02 | CG17039-RA         | Fbgn030530         | 2020310           | 568.22   | 161.89   |
| 1638300_at   | Dot                    | Dorothy                              | down | 3.57 | 2.36E-03 | CG2788-RA          | Fbgn030563         | 44058             | 276.82   | 77.47    |
| 1640144_at   | CG18067                | ---                                  | down | 3.54 | 1.53E-03 | CG18067-RA         | Fbgn0304512        | 37314             | 37327.24 | 10546.43 |
| 1640553_at   | CG15083                | ---                                  | down | 3.52 | 3.38E-02 | CG15083-RA         | CG15083-RA         | 37077             | 60.42    | 172.9    |
| 1635188_at   | CG6675                 | ---                                  | down | 3.53 | 2.13E-02 | CG6675-RA          | Fbgn0302973        | 35439             | 2292.72  | 650.21   |
| 1639894_s_at | Arct1 // CG10102       | CG12505 // ---                       | down | 3.52 | 8.59E-04 | CG10102-RA         | 0039126 // Fbgn000 | 36595 // 36596    | 53.74    | 152.36   |
| 1639332_s_at | CG32626                | ---                                  | down | 3.52 | 2.05E-02 | CG32626-RA         | Fbgn0304934        | 49907             | 32.75    | 93.89    |
| 1632392_s_at | Slob                   | giant slob                           | down | 3.44 | 1.76E-03 | CG6772-RA          | Fbgn0214900        | 34039             | 2604.78  | 756.38   |
| 1624836_at   | CG13195 // DsecCG13195 | ---                                  | down | 3.44 | 4.12E-03 | CG13195-RA         | 0031937 // Fbgn028 | 34048             | 2217.14  | 644.76   |
| 1627271_s_at | CG18422 // CG7655      | ---                                  | down | 3.39 | 5.69E-04 | CG18422-RA         | 0034511 // Fbgn028 | 37373 // 42128    | 2248.84  | 6599.45  |
| 1639896_at   | ---                    | ---                                  | down | 3.39 | 4.19E-02 | HDC10707           | ---                | ---               | 182.39   | 53.87    |
| 1624849_at   | Prosap                 | Prosap                               | down | 3.37 | 6.18E-05 | CG30483-RA         | Fbgn0304752        | 50225             | 2149.08  | 637.10   |
| 1625997_at   | Cyp61                  | Cyp61-like                           | down | 3.37 | 1.14E-03 | CG8455-RA          | Fbgn0204545        | 36316             | 343.19   | 1019.30  |
| 1632964_at   | pink                   | CG15678                              | down | 3.36 | 1.87E-02 | CG15678-RA         | Fbgn0304647        | 37468             | 455.21   | 135.42   |
| 1634296_s_at | CG11566 // sta1        | ---                                  | down | 3.33 | 3.36E-02 | CG32514-RA         | 0031159 // Fbgn000 | 318064 // 3772393 | 187.18   | 56.16    |
| 1630740_at   | CG11052                | ---                                  | down | 3.33 | 2.97E-03 | CG11052-RA         | Fbgn0304934        | 49907             | 224.89   | 67.88    |
| 1631627_s_at | CG5335 // Fbp1         | --- // Protein-1                     | down | 3.28 | 2.63E-03 | CG5335-RA          | 0000639 // Fbgn000 | 37140 // 39566    | 47.72    | 144.88   |
| 1640757_at   | CG33462                | ---                                  | down | 3.27 | 2.65E-03 | CG30086-RA         | Fbgn0303462        | 276841            | 127.24   | 38.86    |
| 1631370_at   | CG39028                | ---                                  | down | 3.27 | 8.61E-04 | CG39028-RA         | Fbgn0303026        | 246390            | 1974.11  | 604.51   |
| 1629013_at   | CG11438                | ---                                  | down | 3.25 | 9.97E-04 | CG11438-RA         | Fbgn0205123        | 41338             | 285.81   | 89.01    |
| 1639866_at   | ---                    | ---                                  | down | 3.24 | 3.67E-02 | S.CG1020717        | ---                | ---               | 78.14    | 24.14    |
| 1637312_at   | YellowF                | yellow f                             | down | 3.23 | 2.71E-02 | CG16280-RA         | Fbgn0201710        | 11595             | 330.80   | 93.20    |
| 1639877_at   | CG4500 // DsecCG4500   | ---                                  | down | 3.23 | 2.03E-02 | CG4500-RA          | 0028519 // Fbgn028 | 34822             | 283.47   | 87.75    |
| 1640540_at   | CG30273                | ---                                  | down | 3.23 | 3.10E-02 | CG30273-RA         | Fbgn0302773        | 248520            | 405.27   | 125.54   |
| 1630130_at   | tepl                   | thiester containing protein II       | down | 3.20 | 2.14E-02 | CG70768-RA         | Fbgn0304934        | 49907             | 168.09   | 49.23    |
| 1642620_at   | glakt                  | glakt                                | down | 3.20 | 4.45E-03 | CG8825-RA          | Fbgn0208173        | 33530             | 245.14   | 76.99    |
| 1640778_at   | ---                    | ---                                  | down | 3.20 | 6.81E-03 | LP09838            | ---                | ---               | 438.22   | 137.10   |
| 1631703_at   | ae63                   | Complementation group D              | down | 3.18 | 1.90E-03 | CG16288-RA         | Fbgn0000023        | 43969             | 37.85    | 117.62   |
| 1631215_at   | CG33132                | ---                                  | down | 3.18 | 8.48E-03 | CG33132-RA         | CG33132-RA         | 31737             | 174.87   | 51.45    |
| 1627652_at   | CG42492                | CG11473                              | down | 3.17 | 1.05E-04 | CG17781-RA         | Fbgn0209994        | 8674956           | 169.28   | 53.48    |
| 1630511_at   | CG13841                | ---                                  | down | 3.14 | 5.60E-04 | CG13841-RA         | Fbgn0303229        | 42969             | 76.26    | 243.71   |
| 1639895_at   | CG31778                | ---                                  | down | 3.14 | 0.08E-04 | CG31778-RA         | CG31778-RA         | 23618             | 124.39   | 42.93    |
| 1631082_at   | B52                    | Serine/arginine rich protein 55      | down | 3.13 | 1.37E-02 | CG10851-RF         | Fbgn0004457        | 41670             | 103.31   | 32.98    |
| 1632430_at   | tsf1                   | Transferin 1                         | down | 3.12 | 6.59E-03 | CG8188-RA          | Fbgn0202355        | 32821             | 19803.95 | 6348.19  |
| 1639520_at   | nmrod c1               | nmrod c1                             | down | 3.11 | 8.89E-03 | CG3844-RA          | Fbgn0303692        | 324915            | 395.89   | 113.00   |
| 1634690_at   | turn                   | lumbleweed                           | down | 3.07 | 3.72E-02 | CG13345-RA         | Fbgn0083566        | 36538             | 157.73   | 51.40    |
| 1631760_at   | CG7798                 | ---                                  | down | 3.04 | 2.86E-02 | CG7798-RA          | Fbgn0303415        | 39573             | 106.32   | 34.92    |
| 1632921_at   | CG30050                | ---                                  | down | 3.03 | 1.11E-03 | CG19314-RA         | Fbgn0303020        | 428417            | 270.39   | 82.80    |
| 1640377_s_at | Rais                   | anon-fast-evolving-1H4               | down | 3.03 | 6.18E-03 | CG2848-RF          | Fbgn0015296        | 31332             | 896.16   | 296.19   |
| 1639442_s_at | tsf1                   | Transferin 1                         | down | 3.01 | 3.73E-02 | CG8188-RB          | Fbgn0202355        | 32821             | 1697.06  | 563.36   |
| 1629492_s_at | Sup2                   | Suppressor of protein 2              | down | 3.01 | 2.26E-04 | CG2801-RB          | Fbgn0119681        | 147833            | 518.88   | 151.88   |
| 1630255_at   | CG16176                | ---                                  | down | 3.00 | 5.83E-06 | CG16176-RA         | Fbgn0051676        | 35351             | 1496.48  | 499.59   |
| 1638302_s_at | CG1090                 | ---                                  | down | 3.00 | 3.33E-02 | CG1090-RA          | Fbgn0301238        | 40551             | 577.94   | 162.96   |
| 1639943_at   | CG15388                | ---                                  | down | 2.98 | 2.77E-02 | CG15388-RA         | Fbgn0303597        | 36540             | 193.57   | 57.00    |
| 1635749_at   | CG15322                | ---                                  | down | 2.94 | 3.58E-02 | CG15322-RA         | Fbgn0301088        | 33012             | 52.30    | 177.79   |
| 1631468_s_at | tim                    | TIMELESS                             | down | 2.92 | 4.17E-03 | CG3234-RC          | Fbgn0014386        | 13696             | 126.90   | 43.41    |
| 1631515_at   | Gad645                 | Gad645                               | down | 2.91 | 8.48E-03 | CG10386-RA         | Fbgn0303646        | 42946             | 273.86   | 82.80    |
| 1630825_at   | CG5798                 | ---                                  | down | 2.91 | 1.04E-03 | CG5798-RA          | Fbgn0303882        | 42509             | 2383.73  | 820.27   |
| 1631762_at   | msta                   | msta                                 | down | 2.90 | 9.97E-03 | CG32900-RA         | Fbgn0303842        | 31200             | 4524.56  | 1650.14  |
| 1627737_at   | CG13908                | ---                                  | down | 2.89 | 3.72E-02 | CG13908-RA         | CG13908-RA         | 182               | 130.10   | 30.88    |
| 1640775_s_at | Nmdmc                  | NAD-dependent methyltransferase      | down | 2.88 | 3.08E-05 | CG18498-RB         | Fbgn0010222        | 47895             | 3247.72  | 1125.74  |
| 1632623_at   | CG2217                 | ---                                  | down | 2.87 | 6.73E-03 | CG2217-RA          | Fbgn0207544        | 43607             | 3850.12  | 1343.27  |
| 1630811_at   | ---                    | ---                                  | down | 2.86 | 1.51E-02 | RC24681            | ---                | ---               | 162.40   | 48.20    |
| 1630524_s_at | lrs                    | lrs                                  | down | 2.84 | 2.68E-03 | CG4715-RA          | Fbgn0301305        | 33290             | 1391.64  | 489.89   |
| 1630239_at   | CG42289                | ---                                  | down | 2.84 | 2.60E-02 | LP09664            | ---                | ---               | 1249.63  | 440.32   |
| 1631801_at   | CG14449                | ---                                  | down | 2.83 | 3.50E-03 | CG14449-RA         | CG14449-RA         | 39319             | 3659.58  | 1291.63  |
| 1630825_at   | Rel                    | relsh                                | down | 2.81 | 3.11E-02 | CG11992-RA         | Fbgn0014018        | 41087             | 4245.26  | 1511.87  |
| 1627376_at   | CG12424                | ---                                  | down | 2.80 | 2.80E-02 | CG12424-RC         | Fbgn0303847        | 28678             | 924.68   | 330.45   |
| 1641857_s_at | CG6530 // RSG7         | --- // Regulator of G-protein signal | down | 2.79 | 3.73E-02 | 0024941 // Fbgn000 | 32678 // 35049     | 4897              | 539.23   | 193.36   |
| 1629478_s_at | Appl1                  | APP-like protein interacting protein | down | 2.78 | 3.38E-03 | CG1200-RA          | Fbgn0042811        | 53472             | 1520.00  | 545.99   |
| 1641722_at   | CG13043                | ---                                  | down | 2.78 | 3.91E-03 | CG13043-RA         | Fbgn0303478        | 30726             | 307.26   | 89.20    |
| 1627436_s_at | Pdp1                   | PAR-domain protein 1                 | down | 2.78 | 3.91E-03 | CG17888-RF         | Fbgn0186994        | 45588             | 4585.46  | 1650.91  |
| 1630088_at   | CG16743                | ---                                  | down | 2.77 | 1.23E-03 | CG16743-RA         | Fbgn0303222        | 34517             | 1758.78  | 634.59   |
| 1630760_at   | CG13618                | ---                                  | down | 2.77 | 2.21E-03 | CG13618-RA         | Fbgn0303555        | 32974             | 129.24   | 39.24    |
| 1629569_at   | Fbx4                   | CG1839                               | down | 2.75 | 9.93E-04 | CG1839-RA          | Fbgn0303555        | 32974             | 1549.49  | 582.85   |
| 1641382_at   | Pmm2                   | Pmm2                                 | down | 2.75 | 4.57E-03 | CG8188-RA          | Fbgn0011690        | 39705             | 122.42   | 44.56    |
| 1633322_at   | CG16729                | ---                                  | down | 2.74 | 3.72E-02 | CG16729-RA         | CG16729-RA         | 182               | 130.10   | 30.88    |
| 1639845_at   | CG9662                 | ---                                  | down | 2.74 | 1.70E-04 | CG9662-RA          | Fbgn0015296        | 33554             | 314.34   | 114.73   |
| 1639836_s_at | CG12512                | ---                                  | down | 2.70 | 1.50E-02 | CG12512-RA         | Fbgn0301238        | 33768             | 715.59   | 264.92   |
| 1630733_at   | CG32344                | ---                                  | down | 2.68 | 3.88E-02 | CG32344-RA         | Fbgn0301704        | 325208            | 193.15   | 57.00    |
| 1631749_at   | ---                    | ---                                  | down | 2.68 | 4.70E-02 | HDC1771B           | ---                | ---               | 46.88    | 17.44    |
| 1639851_at   | Uban                   | CG14224                              | down | 2.67 | 7.79E-03 | CG14224-RA         | Fbgn0301057        | 32977             | 1385.31  | 518.00   |
| 1631515_at   | hnc2f                  | CG2614                               | down | 2.67 | 1.98E-04 | CG2614-RA          | Fbgn0303154        | 42944             | 429.44   | 129.44   |
| 1631392_at   | CG11089                | ---                                  | down | 2.64 | 3.78E-04 | CG11089-RA         | Fbgn0303241        | 42973             | 1389.52  | 519.80   |
| 1634188_s_at | tim                    | TIMELESS                             | down | 2.63 | 8.63E-04 | CG3234-RC          | Fbgn0014386        | 13696             | 5019.62  | 1908.52  |
| 1629598_at   | CG18704                | ---                                  | down | 2.60 | 1.08E-02 | CG18704-RA         | Fbgn0303646        | 42946             | 1248.68  | 388.83   |
| 1632723_s_at | kek5                   | kekkon-like                          | down | 2.60 | 1.38E-04 | CG12199-RC         | Fbgn0301016        | 32930             | 583.43   | 223.12   |
| 1623355_at   | v                      | vermillion                           | down | 2.60 | 2.45E-03 | CG2155-RA          | Fbgn0013865        | 32026             | 1442.52  | 554.87   |
| 1629590_at   | CG8144                 | ---                                  | down | 2.60 | 1.14E-02 | CG8144-RA          | Fbgn0304074        | 37027             | 376.27   | 144.87   |
| 1636149_at   | Spn2B                  | Dm-serpin-2B0                        | down | 2.58 | 1.81E-02 | CG7185-RA          | Fbgn0181973        | 34001             | 2046.05  | 758.05   |
| 1630619_at   | Spn1                   | serpin 1                             | down | 2.58 | 5.17E-03 | CG9456-RA          | Fbgn0209888        | 49808             | 19445.51 | 752.85   |
| 1629395_at   | Cyp4e3                 | Cytochrome P450-4e3                  | down | 2.58 | 6.64E-03 | CG11054-RA         | Fbgn0015036        | 34241             | 310.62   | 146.37   |
| 162837_s_at  | CG18563                | ---                                  | down | 2.58 | 2.34E-02 | CG18563-RA         | Fbgn0185570        | 28446             | 192.61   | 61.61    |
| 1629469_s_at | CG10960                | ---                                  | down | 2.58 | 1.67E-03 | CG10960-RC         | Fbgn0303616        | 38458             | 4987.95  | 1936.77  |
| 1636071_s_at | Cp80                   | cap binding protein 80               | down | 2.57 | 1.98E-02 | CG7035-RA          | Fbgn0202942        | 44092             | 367.30   | 138.89   |
| 1627691_at   | pgant4                 | polypeptide GalNAc transferase 4     | down | 2.56 | 5.44E-04 | HDC10707           | Fbgn0051956        | 26110             | 49.19    | 19.49    |
| 1628611_at   | ---                    | ---                                  | down | 2.55 | 3.54E-02 | S.CG201001         | ---                | ---               | 34.88    | 13.57    |
| 1633493_at   | ---                    | ---                                  | down | 2.55 | 3.94E-02 | S.CG03189          | ---                | ---               | 39.27    | 15.02    |
| 1628492_at   | Aprt                   | Adenine phosphoribosyltransferase    | down | 2.55 | 5.57E-04 | CG18115-RA         | Fbgn0010109        | 48224             | 864.01   | 338.42   |
| 1631962_at   | Mmd                    | Metallothionein D                    | down | 2.55 | 2.93E-02 | CG33192-RA         | Fbgn0303192        | 32670             | 295.08   | 115.71   |
| 1640752_at   | bmm                    | CG30296                              | down | 2.55 | 8.48E-03 | CG30296-RA         | Fbgn0303692        | 324915            | 42946    | 168.82   |
| 1638552_at   | period                 | period                               | down | 2.54 | 4.82E-02 | CG2647-RA          | Fbgn0303068        | 31251             | 492.82   | 194.20   |
| 1635507_at   | CG30031 // CG4269      | ---                                  | down | 2.54 | 2.27E-02 | CG4269-RA          | 0034741 // Fbgn000 | 246440 // 37578   | 984.34   | 388.03   |
| 1634835_at   | CG14642                | ---                                  | down | 2.54 | 1.70E-02 | CG14642-RA         | CG14642-RA         | 46033             | 460.33   | 146.03   |

|              |                       |                                   |      |      |          |             |                   |                   |         |          |
|--------------|-----------------------|-----------------------------------|------|------|----------|-------------|-------------------|-------------------|---------|----------|
| 1628986_a    | ap210                 | ap210                             | down | 2.13 | 1.70E-02 | CG7897-RA   | Fb000033030       | 35512             | 603.71  | 283.29   |
| 1635558_s_at | CG1724 // seq         | --- // seq                        | down | 2.12 | 2.09E-03 | CG2345-RA   | 002891 // Fgpn00  | 246862 // 3772396 | 1712.72 | 272.83   |
| 1636762_s_at | CG1346                | supercooling factor               | down | 2.12 | 2.31E-02 | CG9148-RA   | Fb00002685        | ---               | 1579.48 | 744.48   |
| 1625856_s    | dm                    | diminutive                        | down | 2.12 | 1.89E-04 | CG10798-RA  | Fb00000472        | 31310             | 1899.89 | 897.35   |
| 1635191_at   | Tap42E                | tetraspanin 42E                   | down | 2.11 | 1.81E-03 | CG12946-RA  | Fb00002607        | 35613             | 1169.17 | 552.85   |
| 1638676_s    | CG10690               | ---                               | down | 2.11 | 1.81E-03 | CG12946-RA  | Fb00002607        | 35613             | 1169.17 | 552.85   |
| 1627007_a    | CG4306                | ---                               | down | 2.11 | 1.82E-02 | CG4306-RA   | Fb00003787        | 31710             | 750.41  | 356.22   |
| 1632960_at   | CG3802                | ---                               | down | 2.10 | 5.99E-03 | CG3902-RA   | Fb00003824        | 40369             | 4562.31 | 2188.92  |
| 1634217_at   | mem3                  | lethal (2) 34Fa                   | down | 2.10 | 1.43E-02 | CG18893-RA  | Fb00003941        | 33400             | 1872.72 | 724.92   |
| 1625954_a    | CG2681                | ---                               | down | 2.10 | 2.86E-02 | CG2681-RA   | Fb00004997        | 31288             | 307.09  | 146.35   |
| 1636273_s    | vr                    | vrille                            | down | 2.10 | 2.14E-04 | CG14029-RC  | Fb00001876        | 33759             | 2498.53 | 1186.28  |
| 1631040_at   | sewah                 | seesaw                            | down | 2.10 | 1.38E-03 | CG10623-RC  | Fb00001846        | 31819             | 639.86  | 305.16   |
| 1623459_at   | Spn4                  | neuroserpin                       | down | 2.09 | 2.69E-02 | CG9453-RC   | Fb00002805        | 48905             | 1181.48 | 564.45   |
| 1635407_at   | scd                   | golliath                          | down | 2.09 | 2.07E-03 | CG2678-RC   | Fb00004919        | 38005             | 3173.87 | 1776.02  |
| 1637422_at   | CG5246                | ---                               | down | 2.09 | 2.11E-03 | CG5246-RA   | Fb00003424        | 39433             | 1355.64 | 635.24   |
| 1627915_a    | gapdh2                | G3-P dehydrogenase                | down | 2.08 | 1.12E-02 | CG8893-RA   | Fb00001092        | 32545             | 1832.43 | 13795.82 |
| 1633254_at   | CG7787                | ---                               | down | 2.08 | 5.74E-03 | CG7787-RA   | Fb00002020        | 34142             | 559.74  | 268.81   |
| 1627191_a    | ena                   | enabled                           | down | 2.07 | 6.17E-03 | CG11124E-RC | Fb00001576        | 37201             | 174.26  | 333.88   |
| 1628572_s    | stos                  | suppressor (rdg) 59               | down | 2.06 | 5.51E-03 | CG31006-RC  | Fb00008670        | 43683             | 2482.12 | 1203.33  |
| 1626210_at   | CG10191               | ---                               | down | 2.06 | 1.32E-02 | CG10191-RA  | Fb00003354        | 39502             | 70.59   | 34.26    |
| 1632437_at   | CG1346                | ---                               | down | 2.06 | 2.23E-02 | CG1346-RA   | Fb00003156        | 37482             | 639.86  | 305.16   |
| 1630469_at   | CG15247               | ---                               | down | 2.06 | 3.31E-02 | CG15247-RA  | Fb00003154        | 31919             | 113.82  | 53.32    |
| 1626416_a    | l2ef                  | lethal (2) essential for life     | down | 2.05 | 1.47E-05 | CG4533-RC   | Fb00001296        | 37744             | 6398.84 | 3116.64  |
| 1628947_a    | CG1167                | ---                               | down | 2.05 | 4.16E-02 | CG40140-RA  | Fb00003941        | 33400             | 174.26  | 333.88   |
| 1641071_at   | CG5343                | Inclrin-like                      | down | 2.05 | 1.70E-03 | CG5343-RA   | Fb00004502        | 33544             | 2595.78 | 12662.54 |
| 1631534_at   | efl                   | diet-wingless                     | down | 2.04 | 1.01E-02 | CG8338-RA   | Fb00002051        | 38736             | 214.79  | 105.13   |
| 1638974_a    | dp                    | Daily-lee                         | down | 2.04 | 3.05E-04 | CG32146E-RA | Fb00001604        | 35586             | 1425.73 | 686.72   |
| 1640379_s    | CG34424               | ---                               | down | 2.04 | 2.53E-02 | CG11079-RA  | Fb00002551        | 37699             | 1245.78 | 611.26   |
| 1637491_s    | CG3835                | ---                               | down | 2.04 | 8.99E-03 | CG3835-RC   | Fb00002307        | 31184             | 2962.31 | 1453.94  |
| 1635954_s    | CG3803                | ---                               | down | 2.02 | 2.74E-02 | CG3803-RC   | Fb00002308        | 31289             | 2962.31 | 1453.94  |
| 1624013_s    | CG1                   | Circadianly Regulated Gene        | down | 2.01 | 1.00E-02 | CG32788-RC  | Fb00001738        | 43900             | 229.34  | 113.85   |
| 1626888_at   | CG9426                | ---                               | down | 2.01 | 6.74E-03 | CG9426-RC   | Fb00003285        | 34713             | 866.46  | 430.26   |
| 1631228_s    | h4L2                  | secretory Phospholipase A2        | down | 2.01 | 1.95E-02 | CG11102-RA  | Fb00002426        | 34710             | 917.74  | 458.69   |
| 1634184_a    | CG1167                | ---                               | down | 2.01 | 4.16E-02 | CG40405-RC  | Fb00003941        | 33400             | 174.26  | 333.88   |
| 1642026_at   | CG4660                | ---                               | down | 2.00 | 2.23E-03 | CG4660-RA   | Fb00002839        | 31542             | 1177.40 | 587.34   |
| 1631712_at   | CG10424               | ---                               | down | 2.00 | 2.91E-02 | CG10424-RA  | Fb00003848        | 40369             | 376.50  | 188.80   |
| 1633963_s    | nCrataeha-30D         | Dalphe                            | down | 2.00 | 1.84E-03 | CG4353-RA   | Fb00002434        | 34934             | 1287.93 | 632.76   |
| 1632100_at   | sina                  | anon-fast-evolving-2H7            | down | 2.00 | 8.57E-03 | CG9949-RA   | Fb00003410        | 38884             | 1089.75 | 546.16   |
| 1634436_at   | Asi-C                 | trostatin-C                       | down | 1.99 | 1.53E-03 | CG14919-RA  | Fb00003236        | 34537             | 3697.62 | 1854.87  |
| 1635191_at   | CG7350                | ---                               | down | 1.99 | 3.01E-03 | CG7350-RA   | Fb00003236        | 34537             | 3697.62 | 1854.87  |
| 1626213_s    | CG11899 // DsmCG21426 | --- // CG11899                    | down | 1.99 | 2.91E-03 | CG11899-RA  | 0014427 // Fgpn00 | 46391             | 3229.48 | 1644.50  |
| 1640905_at   | CG32223 // DsmCG32252 | --- // CG32223                    | down | 1.99 | 1.53E-02 | CG32223-RA  | 0052522 // Fgpn00 | 318071            | 1951.42 | 964.50   |
| 1638996_at   | CG14715               | ---                               | down | 1.99 | 3.01E-03 | CG14715-RA  | Fb00003236        | 34537             | 3697.62 | 1854.87  |
| 1640590_at   | CG32195               | ---                               | down | 1.99 | 2.12E-02 | CG32195-RA  | Fb00002196        | 31707             | 307.01  | 156.57   |
| 1628173_s    | CG17189               | ---                               | down | 1.99 | 2.66E-02 | CG17189-RA  | Fb00003485        | 43263             | 1003.82 | 512.21   |
| 1624055_at   | Rsp2                  | anon-fast-evolving-1B9            | down | 1.99 | 8.84E-03 | CG4420-RA   | Fb00002434        | 34934             | 1287.93 | 632.76   |
| 1627752_s    | SK                    | small conductance calcium-activat | down | 1.99 | 6.37E-04 | CG10706-RA  | Fb00002971        | 31456             | 1372.30 | 701.94   |
| 1634702_at   | CG7227                | ---                               | down | 1.99 | 2.96E-02 | CG7227-RA   | Fb00003170        | 34088             | 446.96  | 229.23   |
| 1641343_at   | Cr7                   | corazonin                         | down | 1.99 | 3.75E-03 | CG33072-RA  | Fb00003170        | 34088             | 446.96  | 229.23   |
| 1636174_at   | GatD9                 | Glutathione S transferase D9      | down | 1.99 | 6.29E-03 | CG10091-RA  | Fb00003020        | 31502             | 957.96  | 481.50   |
| 1631110_at   | CG10257               | ---                               | down | 1.99 | 4.89E-03 | CG10257-RA  | Fb00003385        | 36671             | 654.35  | 335.72   |
| 1631982_at   | CG18263               | ---                               | down | 1.99 | 3.01E-04 | CG18263-RA  | Fb00003385        | 36671             | 654.35  | 335.72   |
| 1625655_s    | CG14253               | ---                               | down | 1.99 | 1.30E-03 | CG14253-RC  | Fb00003467        | 43243             | 326.67  | 167.72   |
| 1634382_at   | CG51675               | ---                               | down | 1.99 | 6.29E-03 | CG51675-RA  | Fb00001675        | 31879             | 256.48  | 131.44   |
| 1623551_at   | CG4980                | ---                               | down | 1.99 | 4.74E-02 | CG4980-RA   | Fb00003458        | 43263             | 1287.93 | 632.76   |
| 1640458_at   | CG11211               | ---                               | down | 1.99 | 8.52E-03 | CG11211-RA  | Fb00003367        | 35545             | 6013.34 | 3095.80  |
| 1638281_at   | CG7448                | ---                               | down | 1.99 | 4.74E-02 | S_C3L020796 | Fb00003743        | 40440             | 91.52   | 47.20    |
| 1625151_at   | CG9826                | ---                               | down | 1.99 | 4.74E-02 | CG9826-RA   | Fb00003743        | 40440             | 91.52   | 47.20    |
| 1634041_at   | CG31548               | ---                               | down | 1.99 | 3.24E-03 | CG31548-RA  | Fb00005148        | 318794            | 2001.81 | 1037.03  |
| 1624020_at   | mod(mdg4)             | Modifier67 2                      | down | 1.99 | 5.59E-03 | CG3491-RO   | Fb00001781        | 49228             | 239.09  | 122.47   |
| 1624365_s    | CG31102               | ---                               | down | 1.99 | 1.01E-02 | CG31102-RA  | Fb00001781        | 49228             | 239.09  | 122.47   |
| 1632988_at   | CG43365               | ---                               | down | 1.99 | 2.89E-02 | CG43365-RA  | Fb00002971        | 31456             | 571.47  | 286.17   |
| 1633863_at   | ---                   | ---                               | down | 1.99 | 2.47E-02 | S_C3R003569 | ---               | ---               | 42.41   | 22.23    |
| 1638960_at   | CG11395               | ---                               | down | 1.99 | 1.87E-03 | CG11395-RA  | Fb00003420        | 36937             | 3954.71 | 2072.41  |
| 1631772_s    | MTA1-like             | MTA1-like                         | down | 1.99 | 3.67E-03 | CG24474-RA  | Fb00002434        | 34934             | 157.78  | 76.81    |
| 1629249_at   | peb                   | hindsight                         | down | 1.99 | 1.27E-03 | CG12212-RA  | Fb00003053        | 31941             | 687.57  | 357.44   |
| 1627837_at   | CG5627                | ---                               | down | 1.99 | 1.54E-02 | CG5627-RA   | Fb00003654        | 43376             | 432.17  | 226.86   |
| 1638996_at   | scs                   | scabrous                          | down | 1.99 | 1.54E-02 | CG17979-RC  | Fb00003654        | 43376             | 432.17  | 226.86   |
| 1629222_at   | Ahy13                 | AdoHyase                          | down | 1.99 | 1.75E-03 | CG11654-RA  | Fb00001485        | 33561             | 175.84  | 91.90    |
| 1629240_at   | M894Dc                | Male-specific RNA 84Dc            | down | 1.99 | 3.21E-02 | CG17945-RA  | Fb00004174        | 40867             | 65.12   | 34.22    |
| 1631178_at   | CG13663               | ---                               | down | 1.99 | 1.76E-02 | CG13663-RA  | Fb00001121        | 40867             | 65.12   | 34.22    |
| 1631722_at   | ---                   | ---                               | down | 1.99 | 1.28E-02 | GM02743     | ---               | ---               | 507.92  | 287.51   |
| 1629745_at   | CG31643               | ---                               | down | 1.99 | 1.62E-02 | CG31643-RA  | Fb00005163        | 31887             | 184.60  | 97.35    |
| 1629394_at   | CG12182               | ---                               | down | 1.99 | 8.74E-03 | CG12182-RA  | Fb00005163        | 31887             | 184.60  | 97.35    |
| 1633558_s    | CG14997               | Suppressor of Under-Replication   | down | 1.99 | 7.57E-03 | CG14997-RC  | Fb00003515        | 38516             | 806.55  | 427.74   |
| 1628451_at   | SuUR                  | Suppressor of Under-Replication   | down | 1.99 | 3.39E-02 | CG7866-RA   | Fb00002355        | 45739             | 236.56  | 122.40   |
| 1629717_at   | Cyp72a5               | Cyp72a5                           | down | 1.99 | 3.75E-02 | CG11821-RA  | Fb00003385        | 36671             | 654.35  | 335.72   |
| 1633362_at   | CG13654               | ---                               | down | 1.99 | 3.38E-02 | CG13654-RA  | Fb00003290        | 43028             | 254.59  | 135.60   |
| 1631760_at   | Edem1                 | Edem1                             | down | 1.99 | 1.46E-02 | CG3816-RC   | Fb00002311        | 31154             | 1003.08 | 534.36   |
| 1627465_at   | Men4                  | NF-YC-like                        | down | 1.99 | 8.75E-03 | CG11360-RA  | Fb00003385        | 36671             | 654.35  | 335.72   |
| 1640479_at   | CG31777               | ---                               | down | 1.99 | 1.70E-02 | CG31777-RA  | Fb00002311        | 31154             | 1003.08 | 534.36   |
| 1625819_at   | sno                   | Strawberry Notch                  | down | 1.99 | 2.96E-02 | CG1903-RC   | Fb00005410        | 32273             | 2400.06 | 1287.50  |
| 1624911_at   | Cyp28c2               | Cyp28c2                           | down | 1.99 | 1.75E-02 | CG1903-RC   | Fb00005410        | 32273             | 2400.06 | 1287.50  |
| 1640237_at   | CG2023                | ---                               | down | 1.99 | 1.10E-03 | CG2023-RA   | Fb00003912        | 32814             | 393.99  | 211.80   |
| 1624440_at   | ---                   | ---                               | down | 1.99 | 3.89E-02 | AM01482     | ---               | ---               | 377.60  | 203.73   |
| 1632275_at   | Asi                   | trostatin-A4                      | down | 1.99 | 3.08E-03 | CG12632-RA  | Fb00002434        | 34934             | 1093.82 | 512.21   |
| 1624010_at   | CG9062                | ---                               | down | 1.99 | 1.04E-02 | CG9062-RA   | Fb00003807        | 39199             | 175.75  | 95.53    |
| 1637154_at   | CG7470                | glutamate 5-kinase                | down | 1.99 | 3.74E-02 | CG7470-RA   | Fb00003746        | 40440             | 3778.82 | 2045.46  |
| 1632626_s    | CG18412               | ---                               | down | 1.99 | 5.74E-04 | CG18412-RA  | Fb00003746        | 40440             | 3778.82 | 2045.46  |
| 1632466_at   | CG5598                | ---                               | down | 1.99 | 2.15E-02 | CG5598-RA   | Fb00005776        | 43330             | 3090.70 | 1677.90  |
| 1631650_s    | CG2056                | ---                               | down | 1.99 | 4.19E-02 | CG2056-RC   | Fb00003051        | 31777             | 239.92  | 130.31   |
| 1631300_s    | Kip68A                | Kinesin-like protein at 98A       | down | 1.99 | 1.74E-02 | CG10594-RA  |                   |                   |         |          |
