# Supplementary material for: TDP-43 prevents retrotransposon activation in the Drosophila motor system through regulation of Dicer-2 activity
Source: PubMed Central journal article supplement (PMC7334854; doi:10.1186/s12915-020-00816-1), 2020-07-03
Supplement: 12915_2020_816_MOESM6_ESM.pdf [file 12915_2020_816_MOESM6_ESM.pdf]

Figure 1-Individual Data Values

| <b>b</b>          |            | qRT-PCR - Adult brains                |                                        |  |
|-------------------|------------|---------------------------------------|----------------------------------------|--|
| <b>accord</b>     |            |                                       |                                        |  |
|                   | $w^{1118}$ | $tbph^{\Delta 23/\Delta 23}.elav>GFP$ | $tbph^{\Delta 23/\Delta 23}.elav>TBPH$ |  |
| exp1              | 1.00       | 4.13                                  | 1.10                                   |  |
| exp2              | 1.00       | 3.85                                  | 0.95                                   |  |
| exp3              | 1.00       | 4.05                                  | 1.05                                   |  |
| average           | 1.00       | 4.01                                  | 1.03                                   |  |
| <b>gypsy</b>      |            |                                       |                                        |  |
|                   | $w^{1118}$ | $tbph^{\Delta 23/\Delta 23}.elav>GFP$ | $tbph^{\Delta 23/\Delta 23}.elav>TBPH$ |  |
| exp1              | 1.00       | 2.80                                  | 0.86                                   |  |
| exp2              | 1.00       | 1.65                                  | 1.82                                   |  |
| exp3              | 1.00       | 2.10                                  | 0.90                                   |  |
| average           | 1.00       | 2.18                                  | 1.19                                   |  |
| normalized values |            |                                       |                                        |  |

| <b>c</b>          |  | WB - Adult brains |        |        |        |
|-------------------|--|-------------------|--------|--------|--------|
| <b>anti-ENV</b>   |  |                   |        |        |        |
|                   |  | lane 1            | lane 2 | lane 3 | lane 4 |
| exp1              |  | 21                | 100    | 162    | 61     |
| exp2              |  | 26                | 100    | 166    | 49     |
| average           |  | 23.5              | 100    | 164    | 55     |
| normalized values |  |                   |        |        |        |

**Figure 3-Individual Data Values**

| <b>a</b> RNA silencing machinery is impaired in TBPH mutants |        |        |        |        |
|--------------------------------------------------------------|--------|--------|--------|--------|
|                                                              | lane 1 | lane 2 | lane 3 | lane 4 |
| exp1                                                         | 100    | 44     | 99     | 87     |
| exp2                                                         | 100    | 26     | 93     | 45     |
| mean                                                         | 100    | 35     | 96     | 66     |

normalized values

| <b>b</b> Dcr-2 levels in TBPH mutant |                   |                         |
|--------------------------------------|-------------------|-------------------------|
|                                      | w <sup>1118</sup> | tbph <sup>Δ23/Δ23</sup> |
| exp1                                 | 100               | 44                      |
| exp2                                 | 100               | 79                      |
| exp3                                 | 100               | 48                      |
| mean                                 | 100               | 57                      |

normalized values

| <b>c</b> Dcr-2 is reduced in TBPH mutant |                   |                         |
|------------------------------------------|-------------------|-------------------------|
|                                          | w <sup>1118</sup> | tbph <sup>Δ23/Δ23</sup> |
| exp1                                     | 100               | 57                      |
| exp2                                     | 100               | 64                      |
| exp3                                     | 100               | 64                      |
| exp4                                     | 100               | 52                      |
| mean                                     | 100               | 59                      |

normalized values

| <b>d</b> SH-SY5Y (human neuroblastoma) |        |        |
|----------------------------------------|--------|--------|
| Dicer                                  | lane 1 | lane 2 |
| exp1                                   | 100    | 80     |
| exp2                                   | 100    | 47     |
| exp3                                   | 100    | 48     |
| mean                                   | 100    | 58     |
| TDP-43                                 | lane 1 | lane 2 |
| exp1                                   | 100    | 32     |
| exp2                                   | 100    | 54     |
| exp3                                   | 100    | 12     |
| mean                                   | 100    | 33     |

normalized values

| <b>e</b> Co-IP - Adult heads |                     |                              |
|------------------------------|---------------------|------------------------------|
|                              | <i>Protein-mRNA</i> |                              |
| dicer-2                      | Elav>TBPH           | Elav>TBPH-RBD <sup>mut</sup> |
| exp1                         | 4.6                 | 1                            |
| exp2                         | 3                   | 1                            |
| mean                         | 3.8                 | 1                            |
| syntaxin                     | Elav>TBPH           | Elav>TBPH-RBD <sup>mut</sup> |
| exp1                         | 8.1                 | 1                            |
| exp2                         | 2.7                 | 1                            |
| mean                         | 5.4                 | 1                            |
| rpl11                        | Elav>TBPH           | Elav>TBPH-RBD <sup>mut</sup> |
| exp1                         | 1.4                 | 1                            |
| exp2                         | 1.5                 | 1                            |
| mean                         | 1.45                | 1                            |

normalized values
